# Supplementary material for: Synthesis of aromatic glycoconjugates. Building blocks for the construction of combinatorial glycopeptide libraries
Source: PubMed Central journal article supplement (PMC4222372; doi:10.3762/bjoc.10.256), 2014-10-22

# Supporting Information

for

## **Synthesis of aromatic glycoconjugates. Building blocks for the construction of combinatorial glycopeptide libraries**

Markus Nörrlinger, Thomas Ziegler\*

Address: Institute of Organic Chemistry, University of Tuebingen, Auf der Morgenstelle 18, 72076 Tuebingen, Germany

Email: Thomas Ziegler - [thomas.ziegler@uni-tuebingen.de](mailto:thomas.ziegler@uni-tuebingen.de)

\* Corresponding author

### **NMR Spectra**

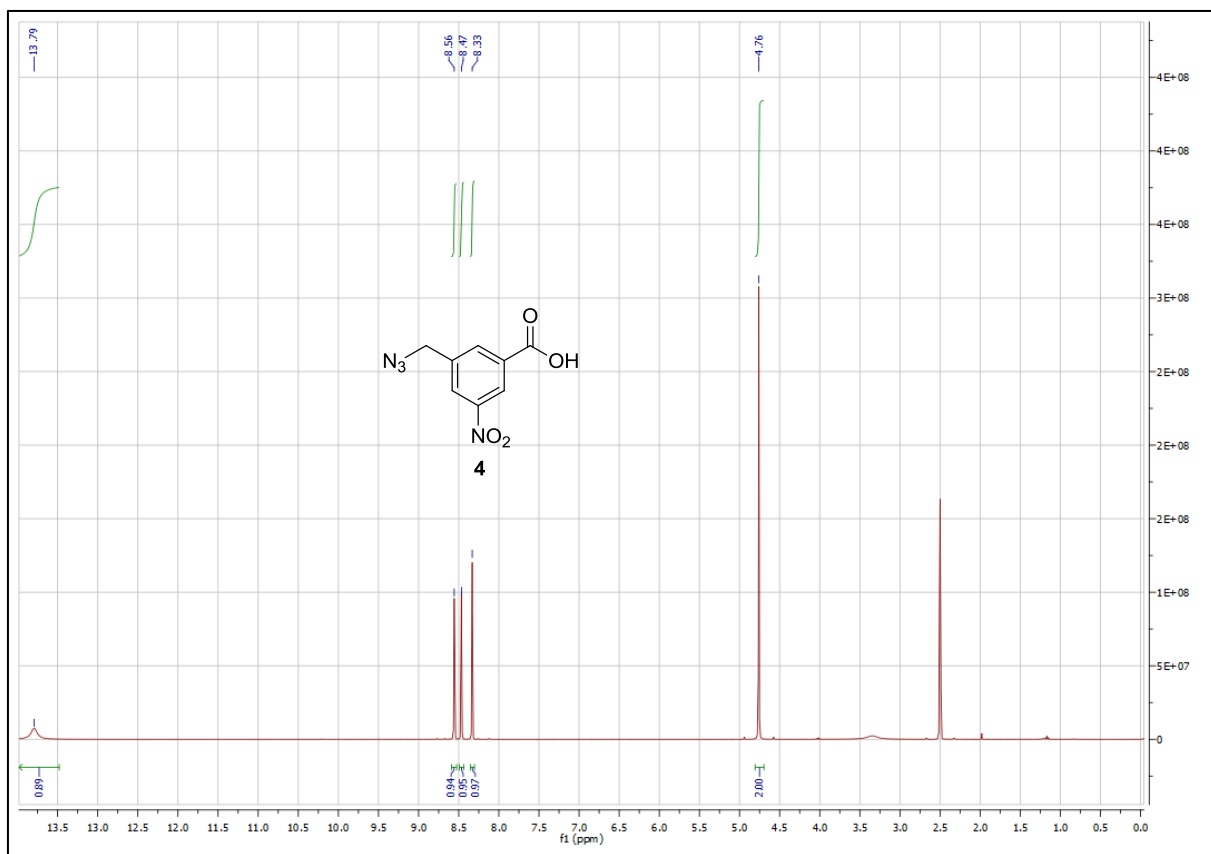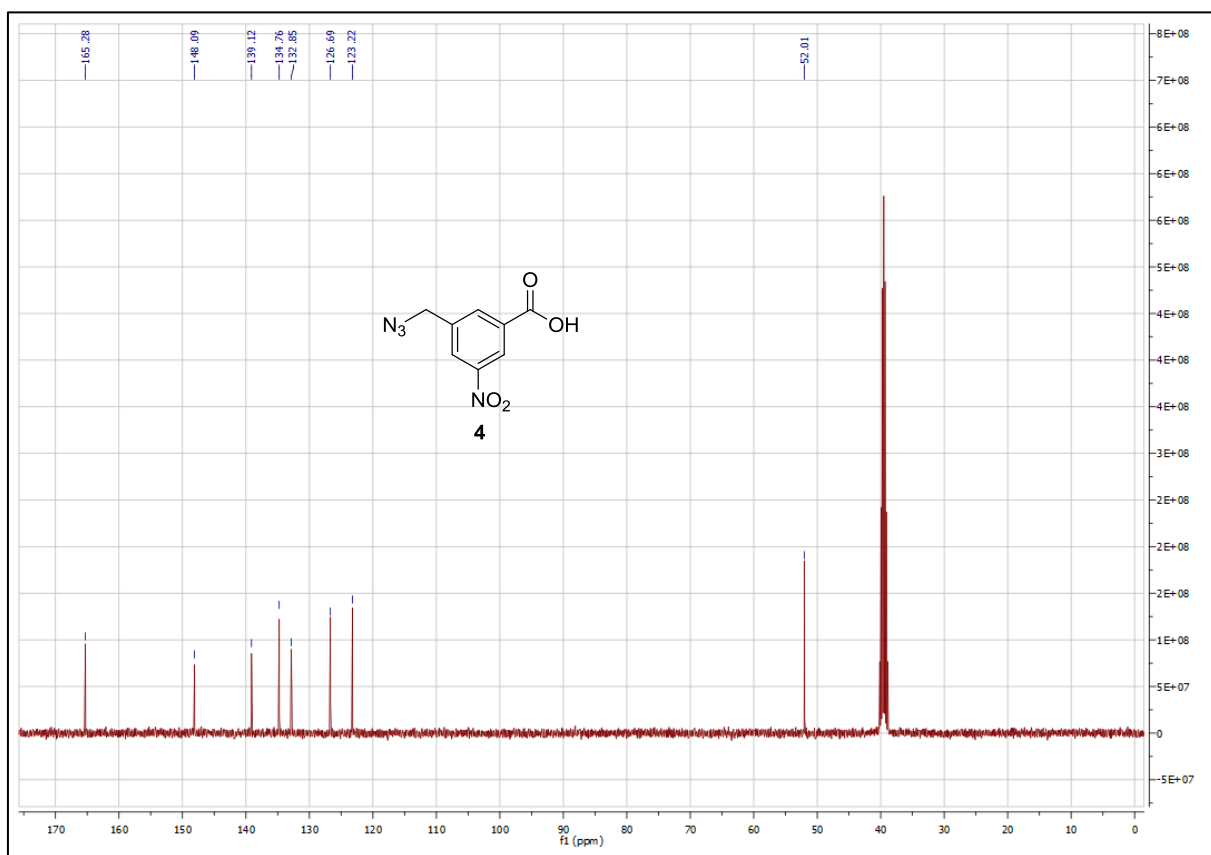

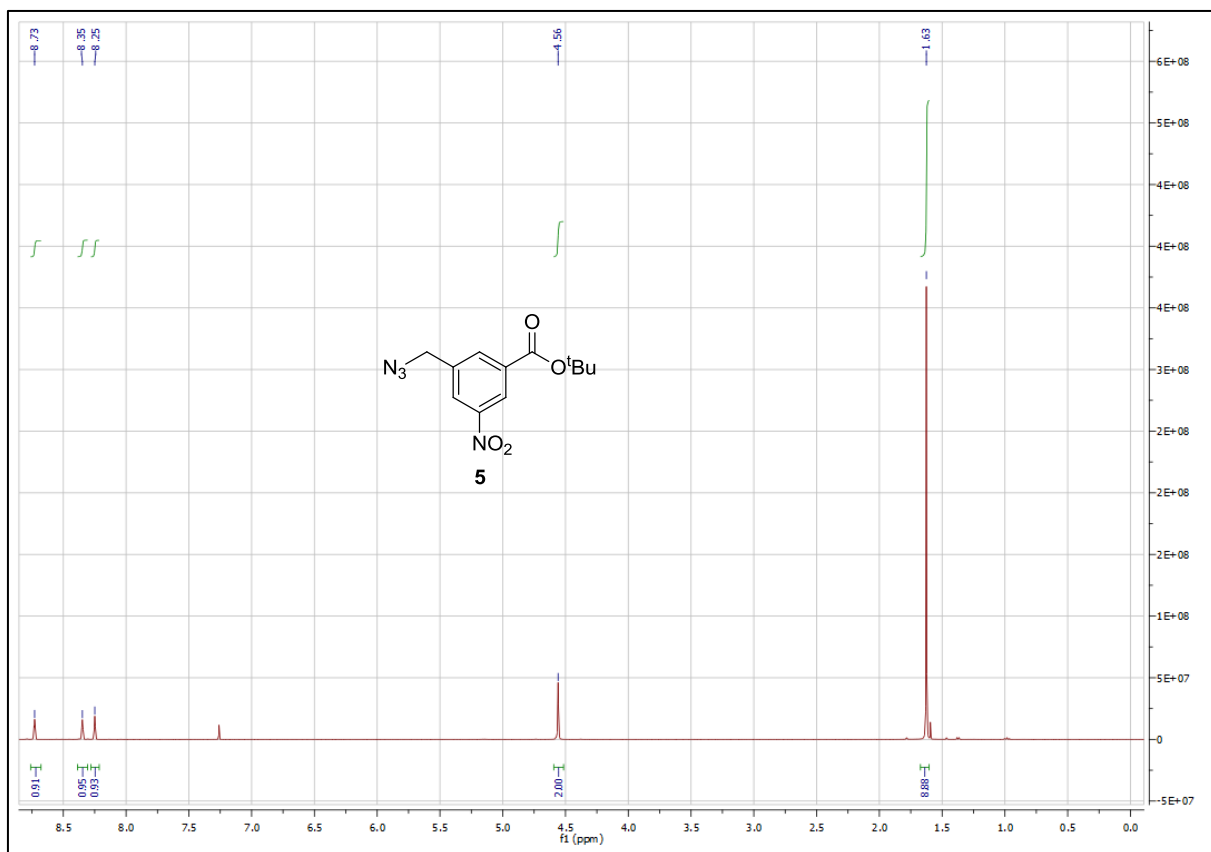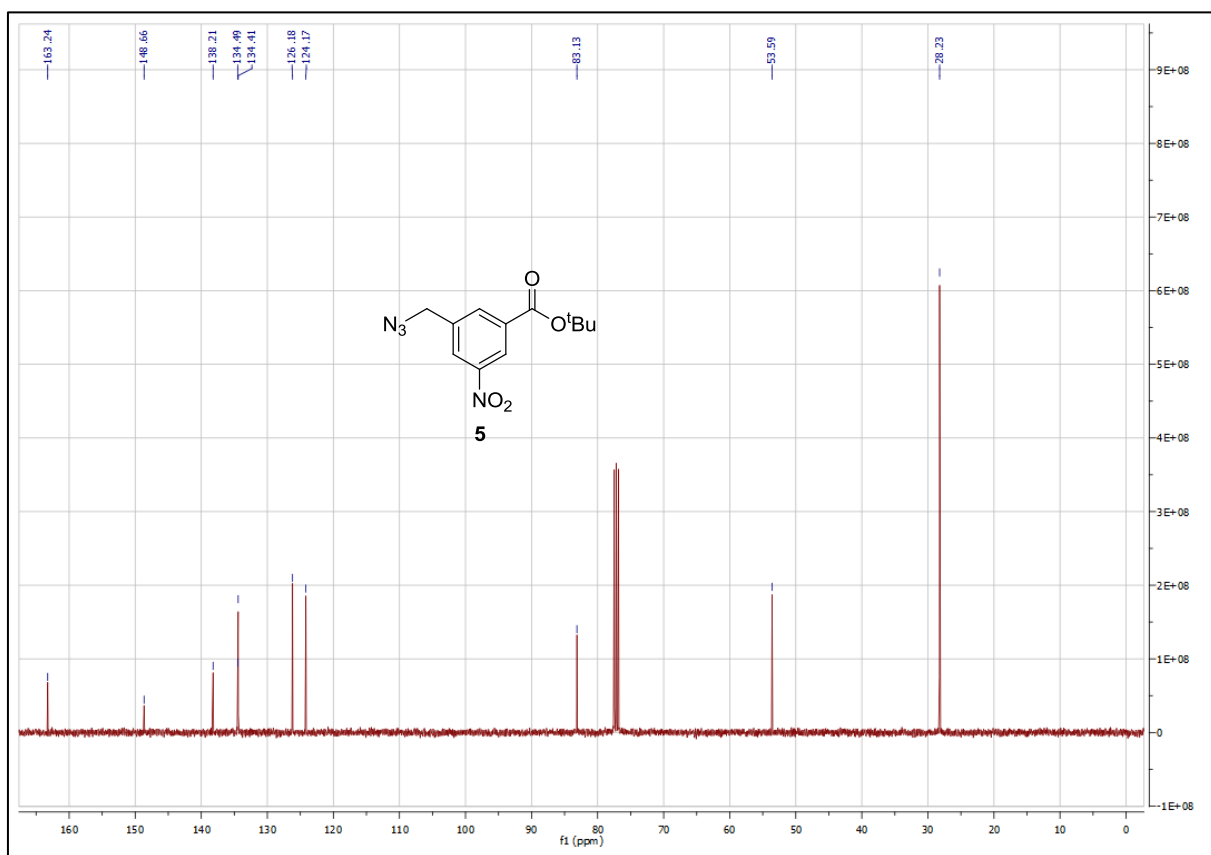

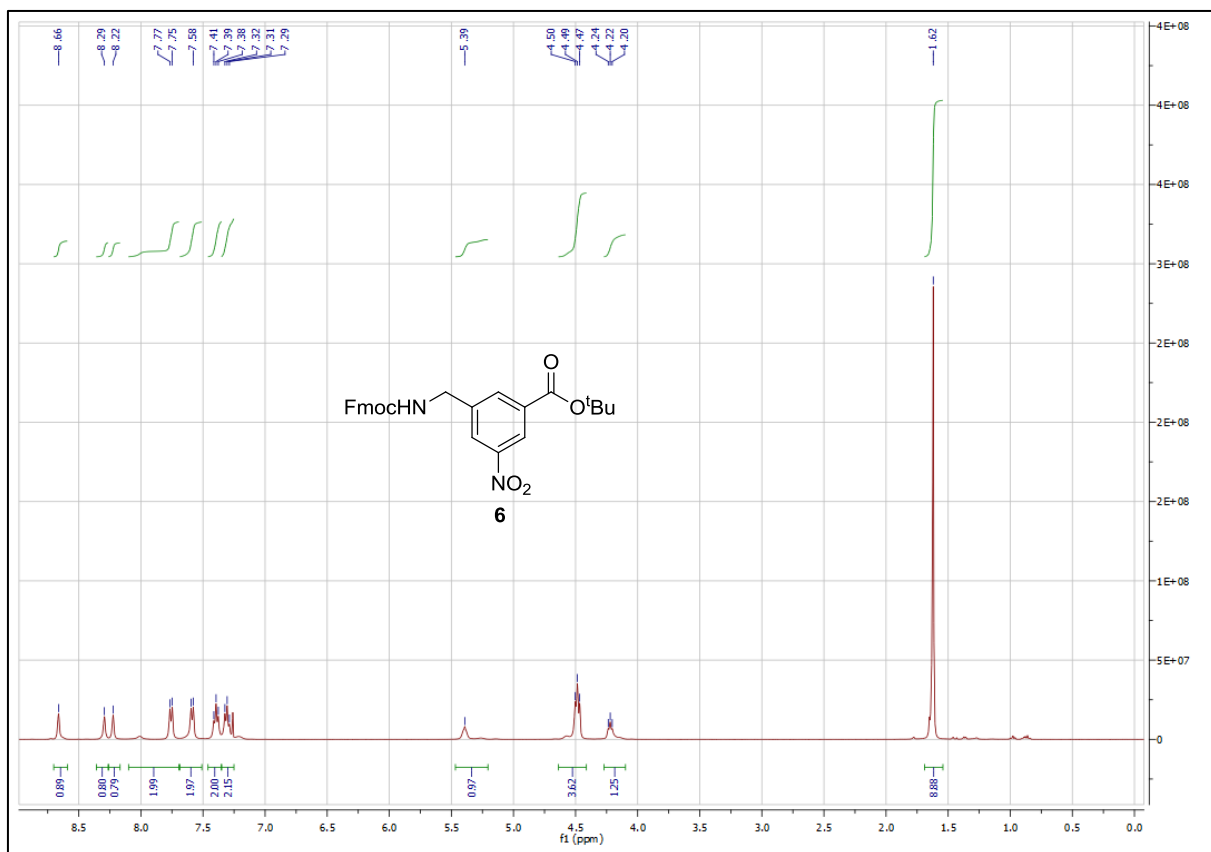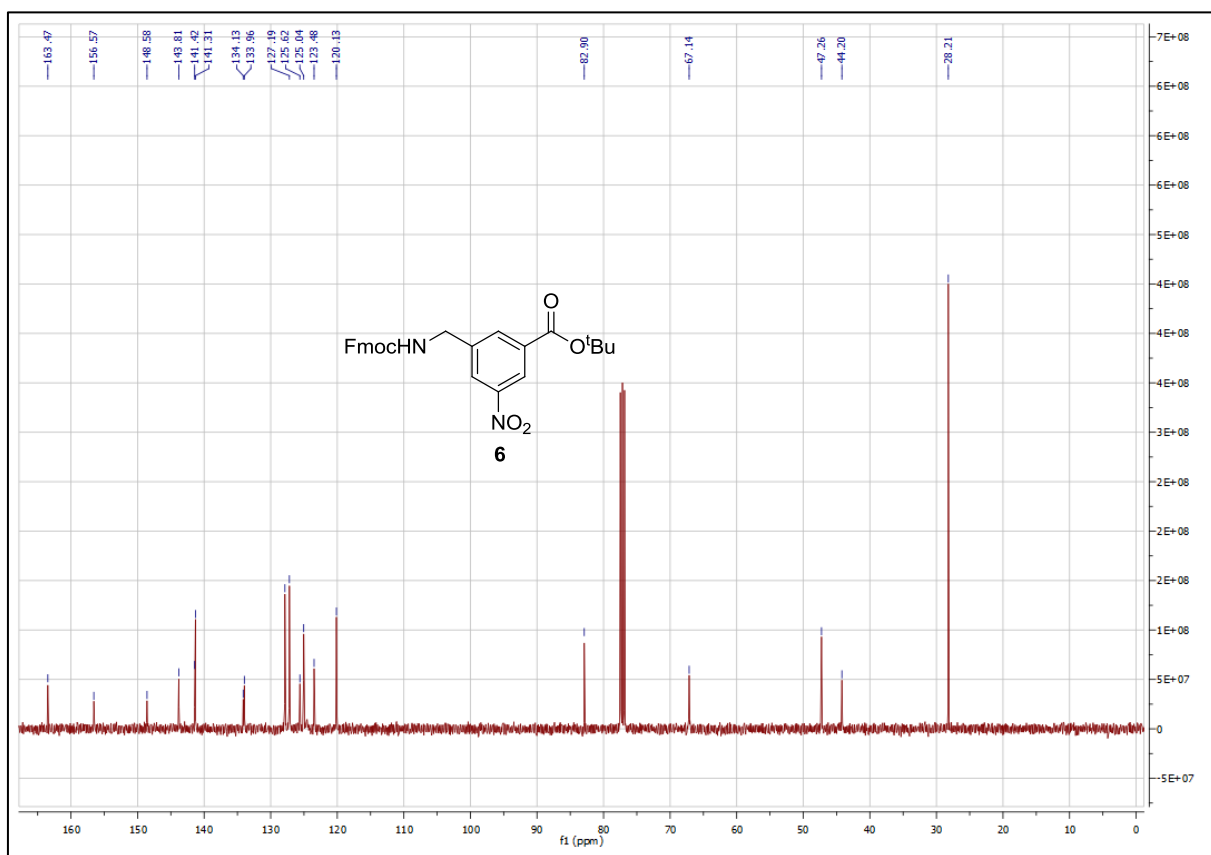

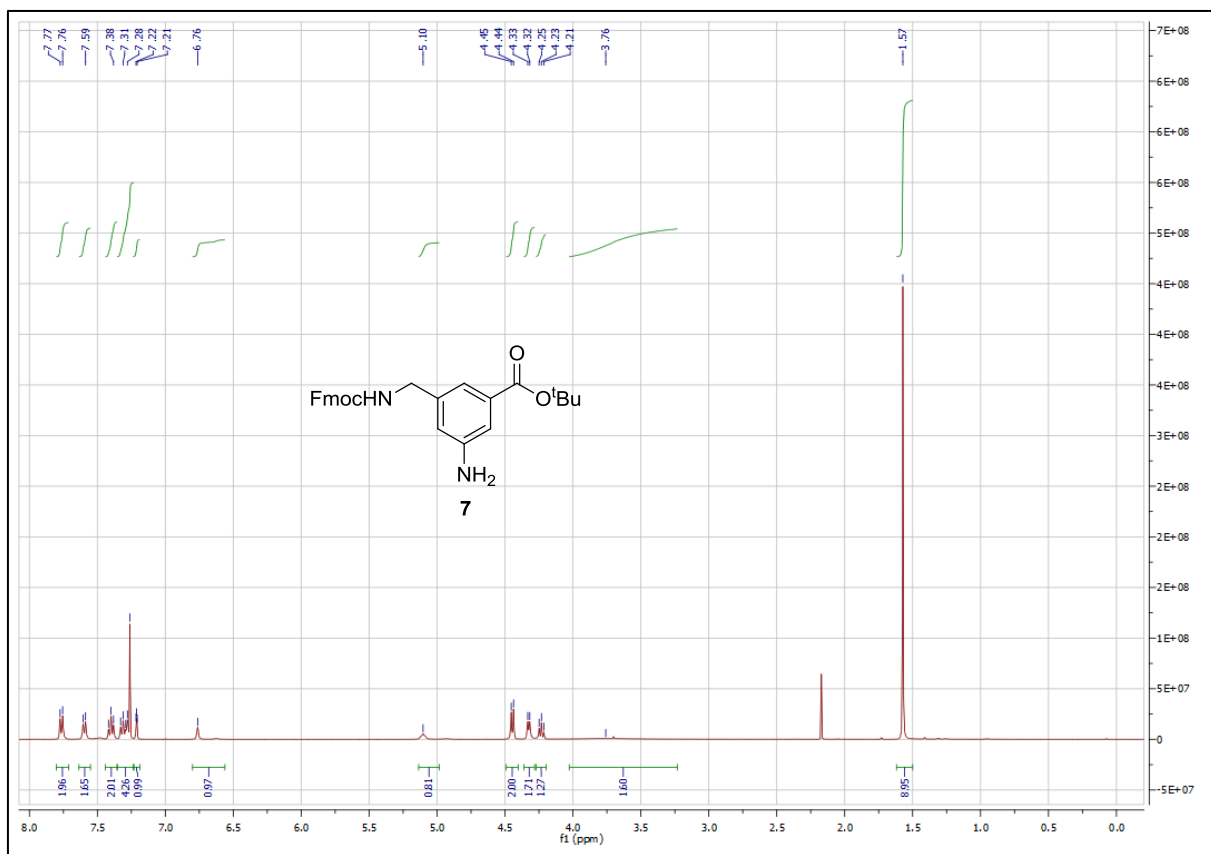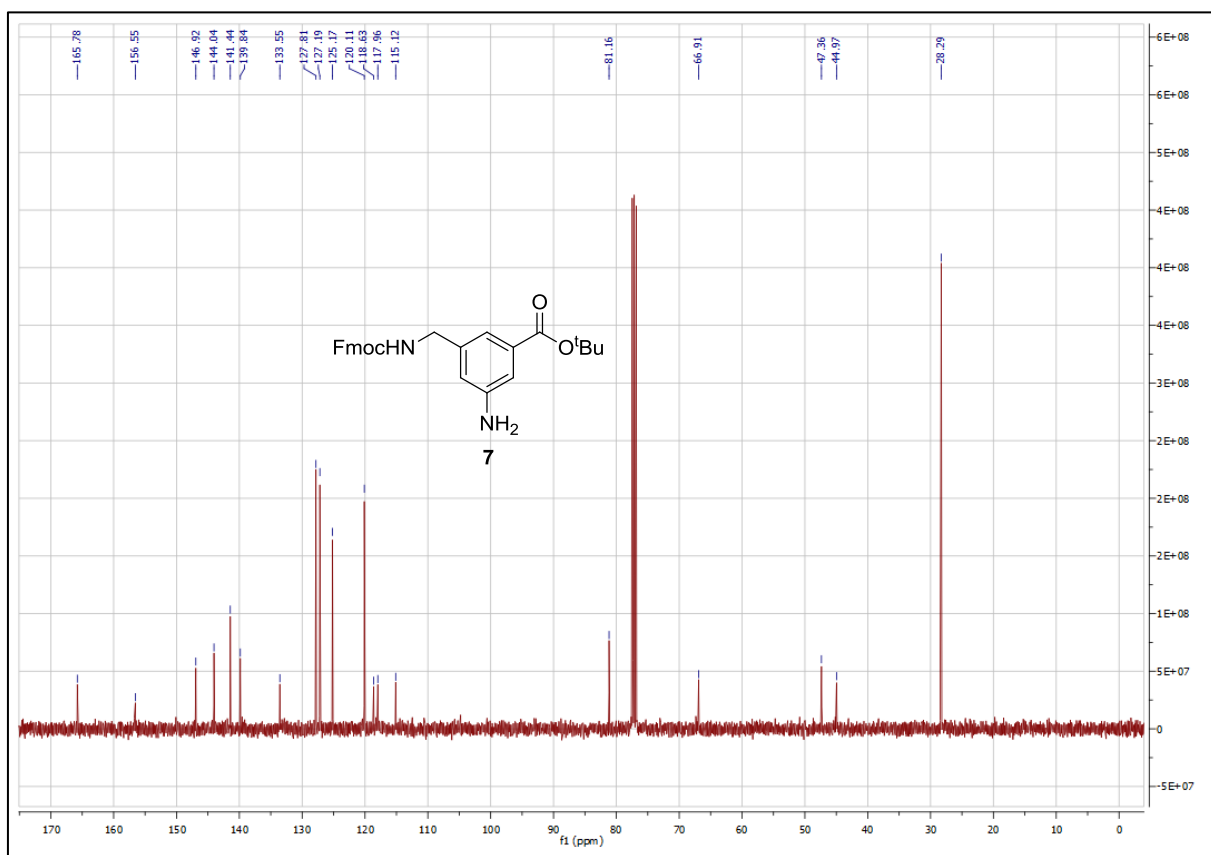

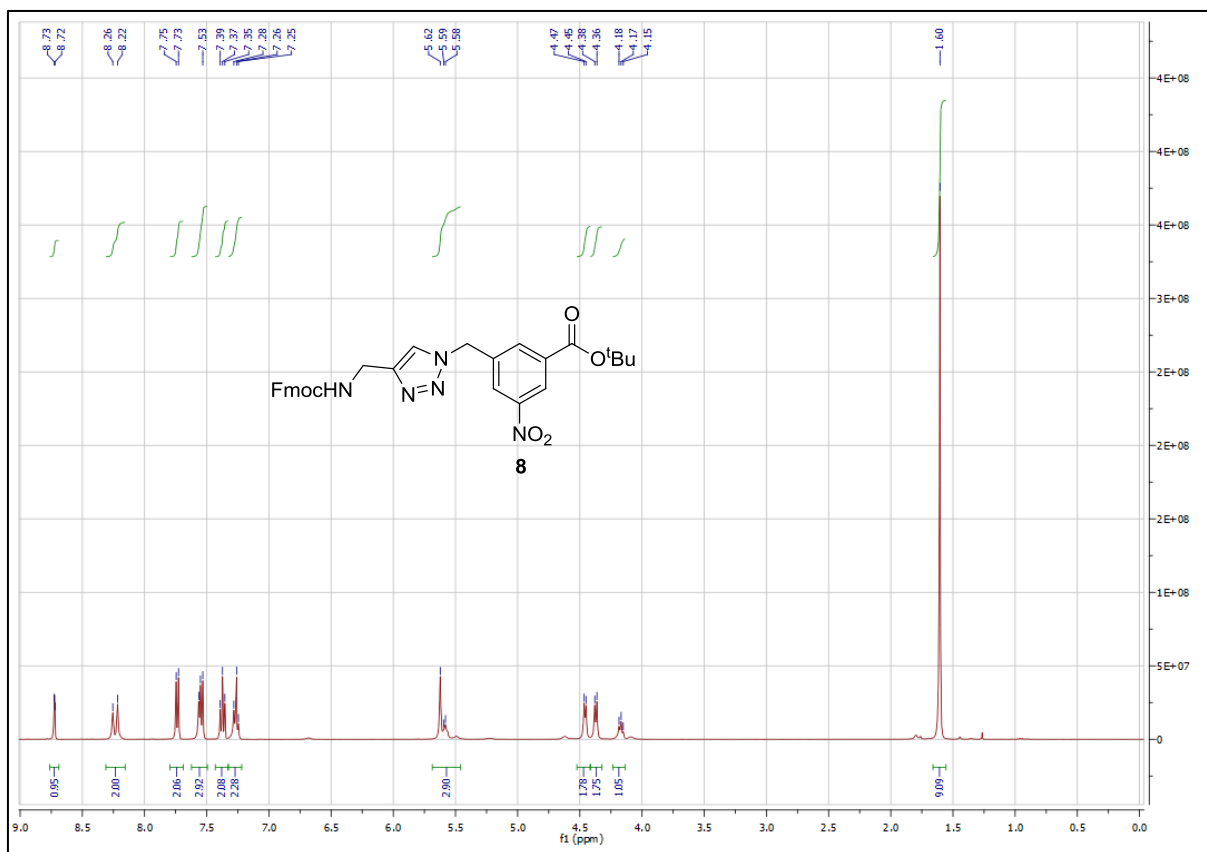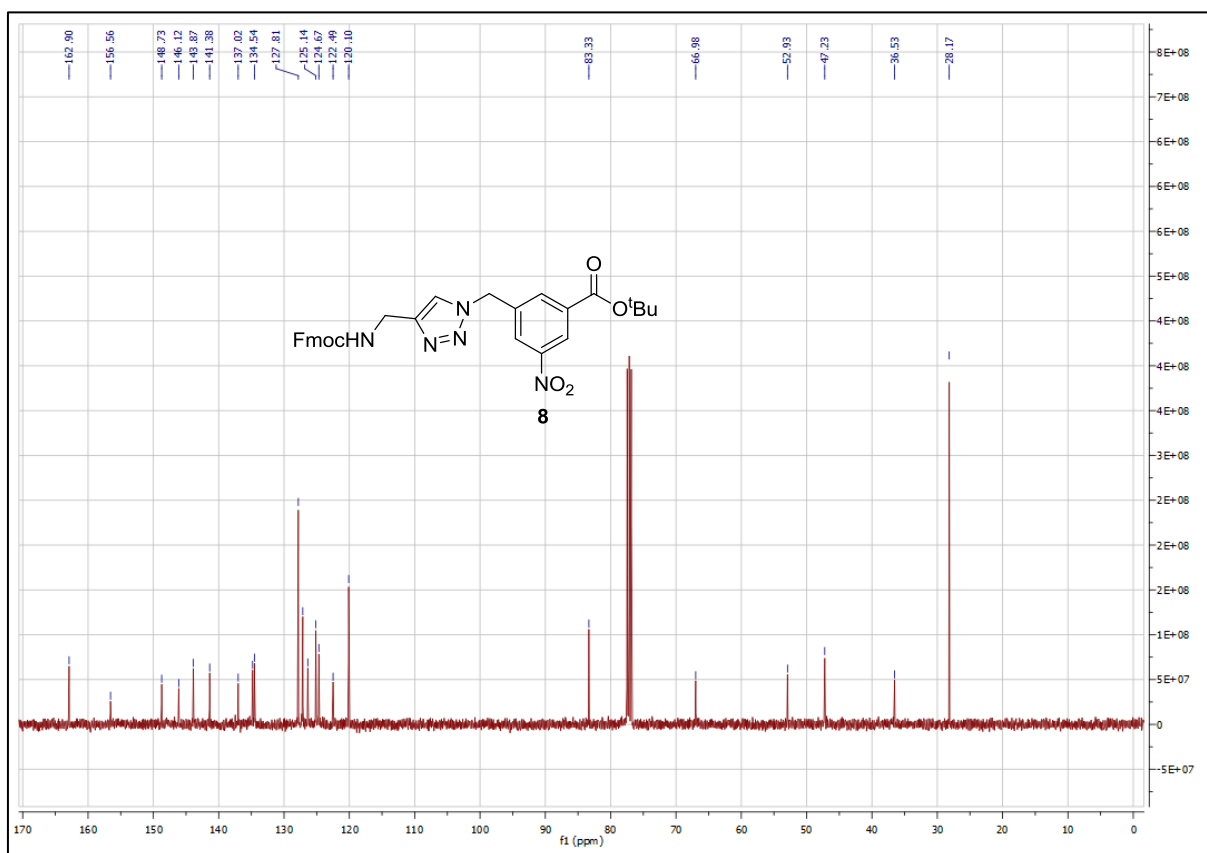

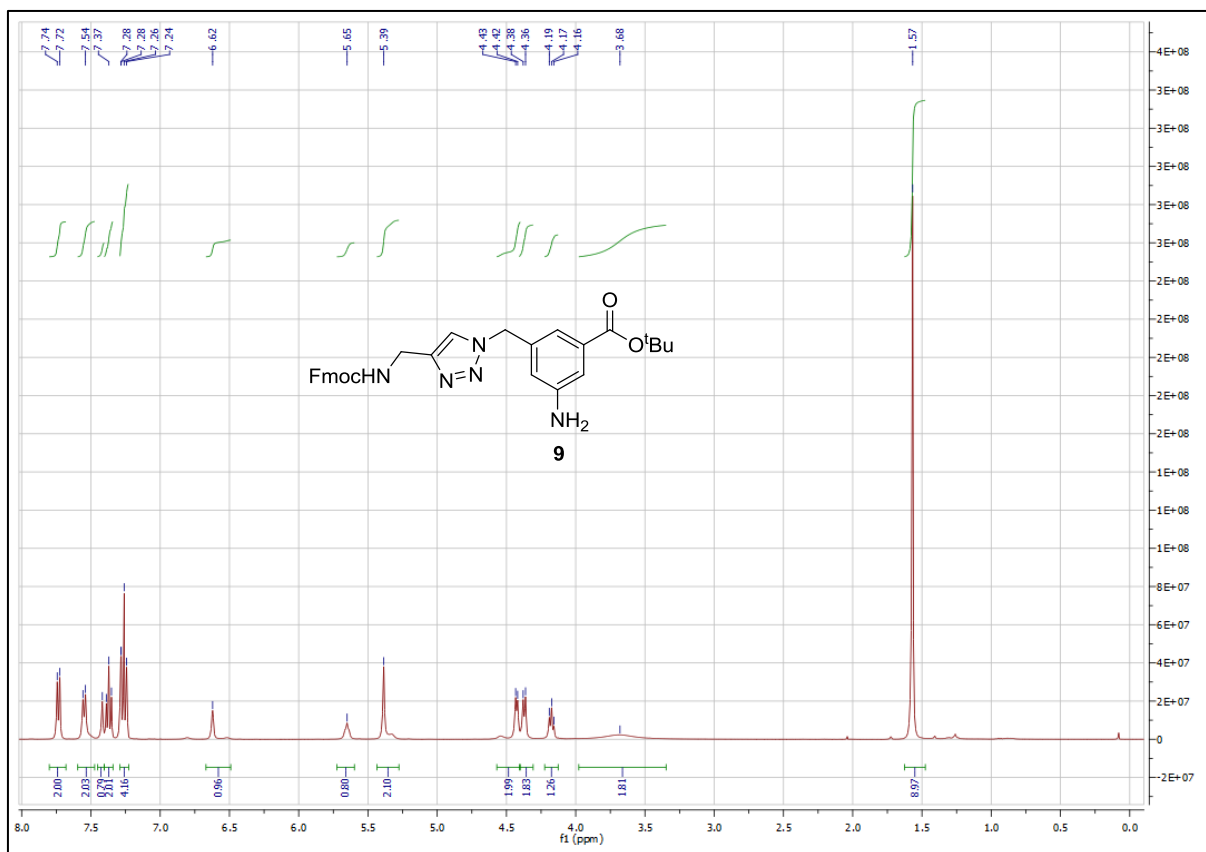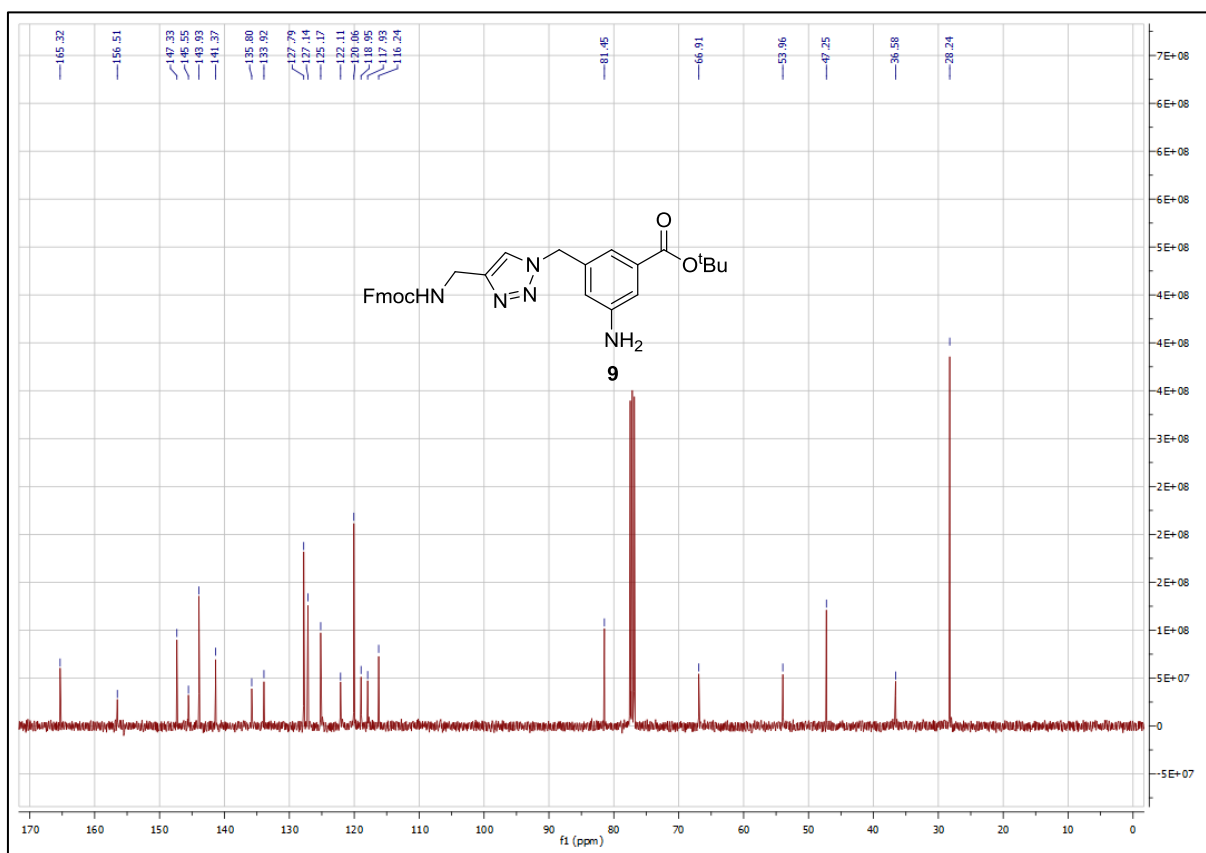

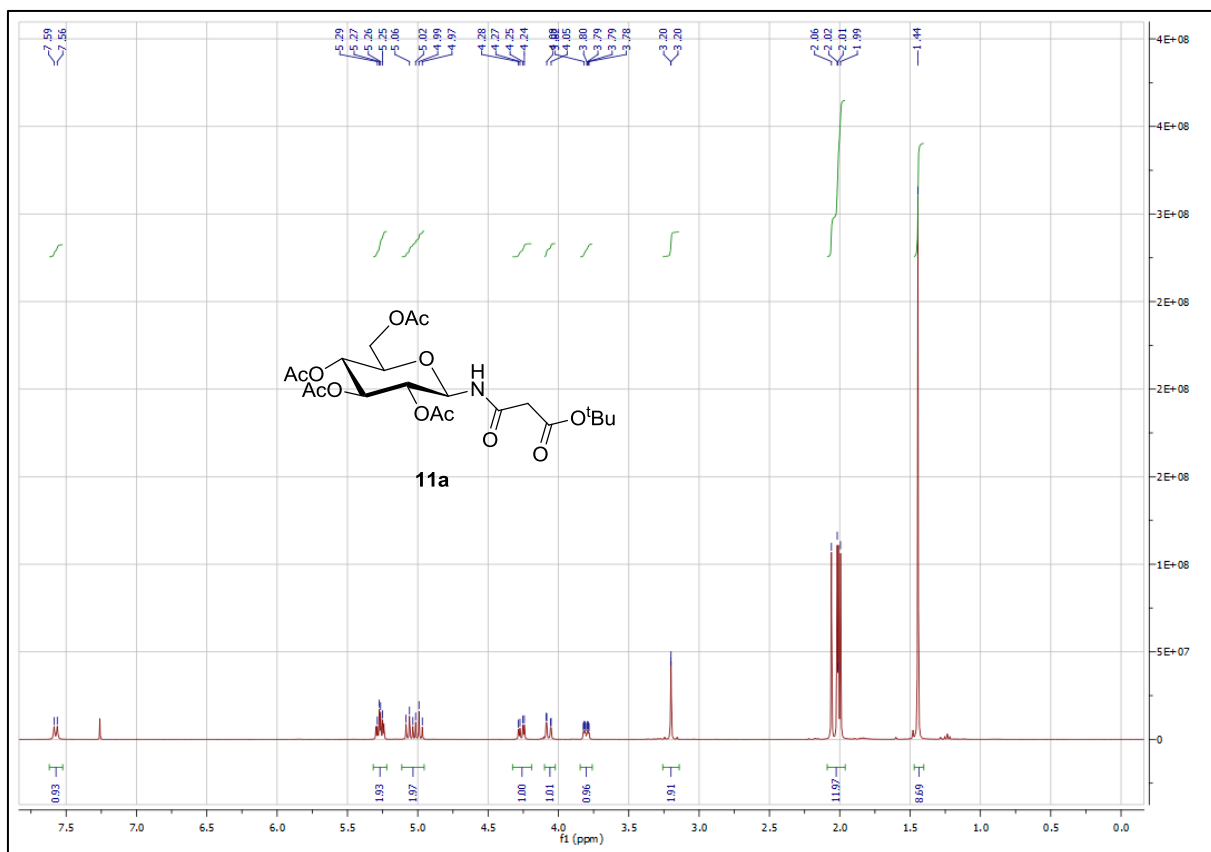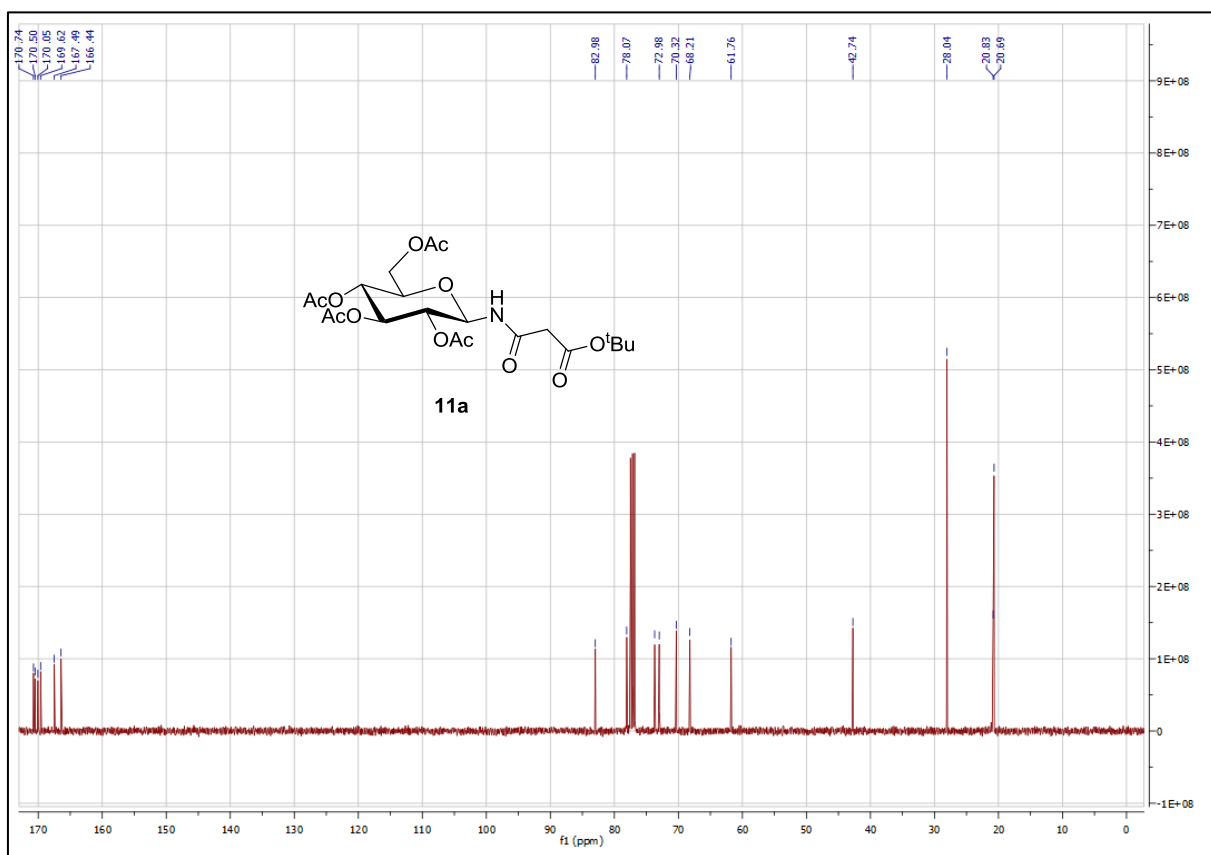



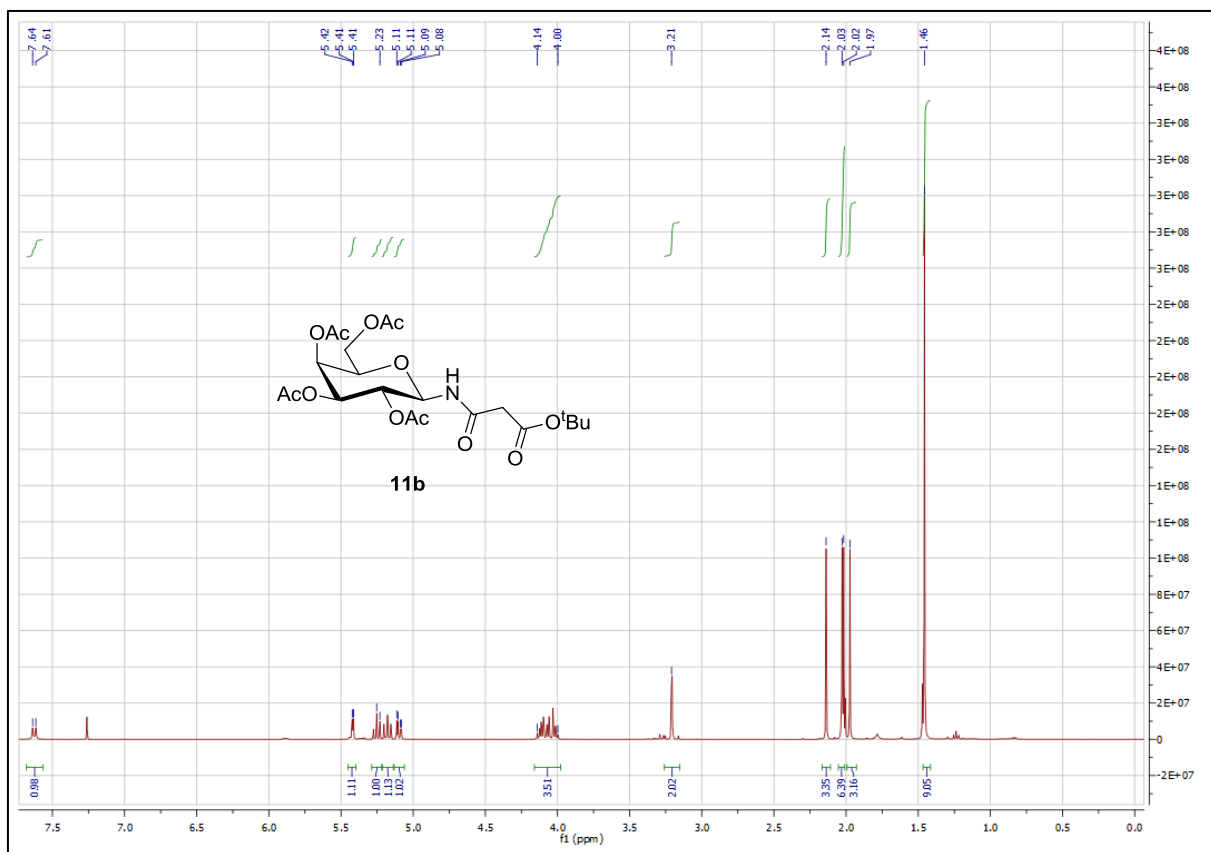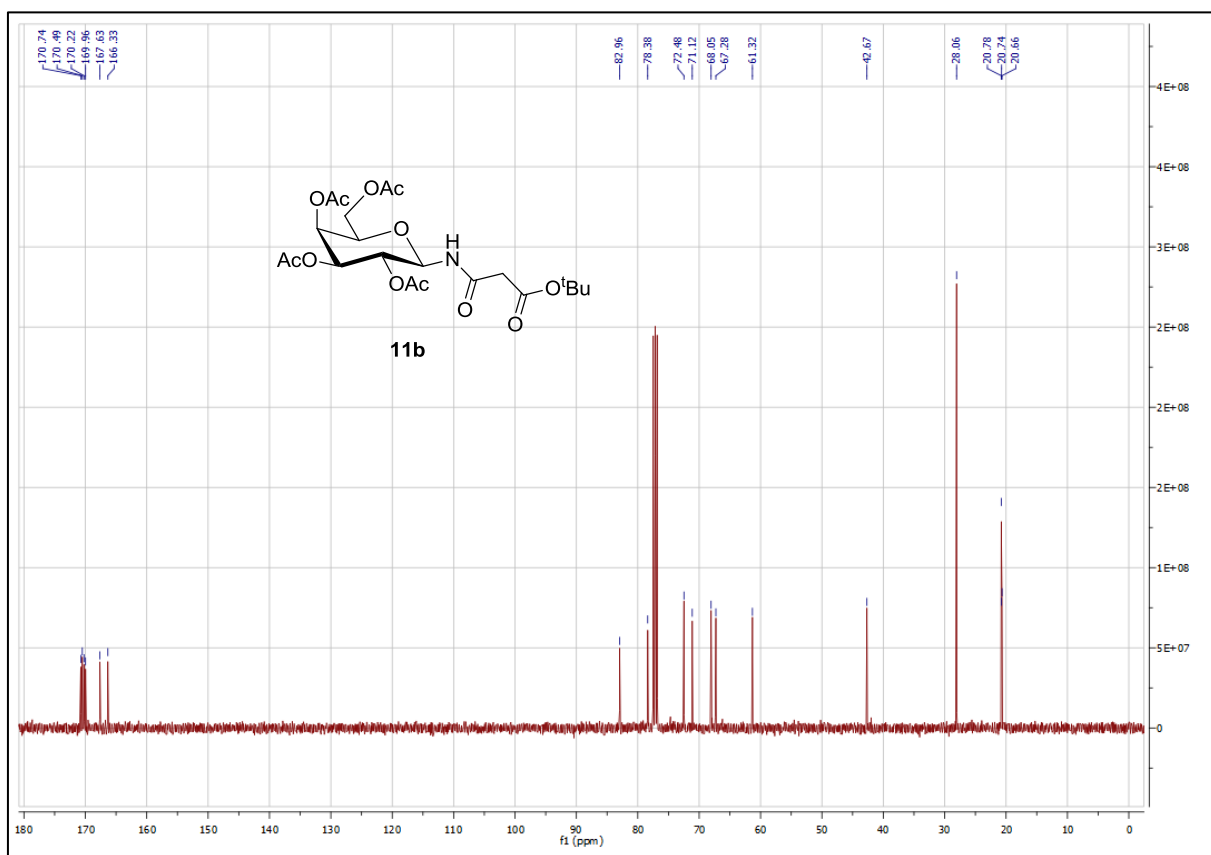

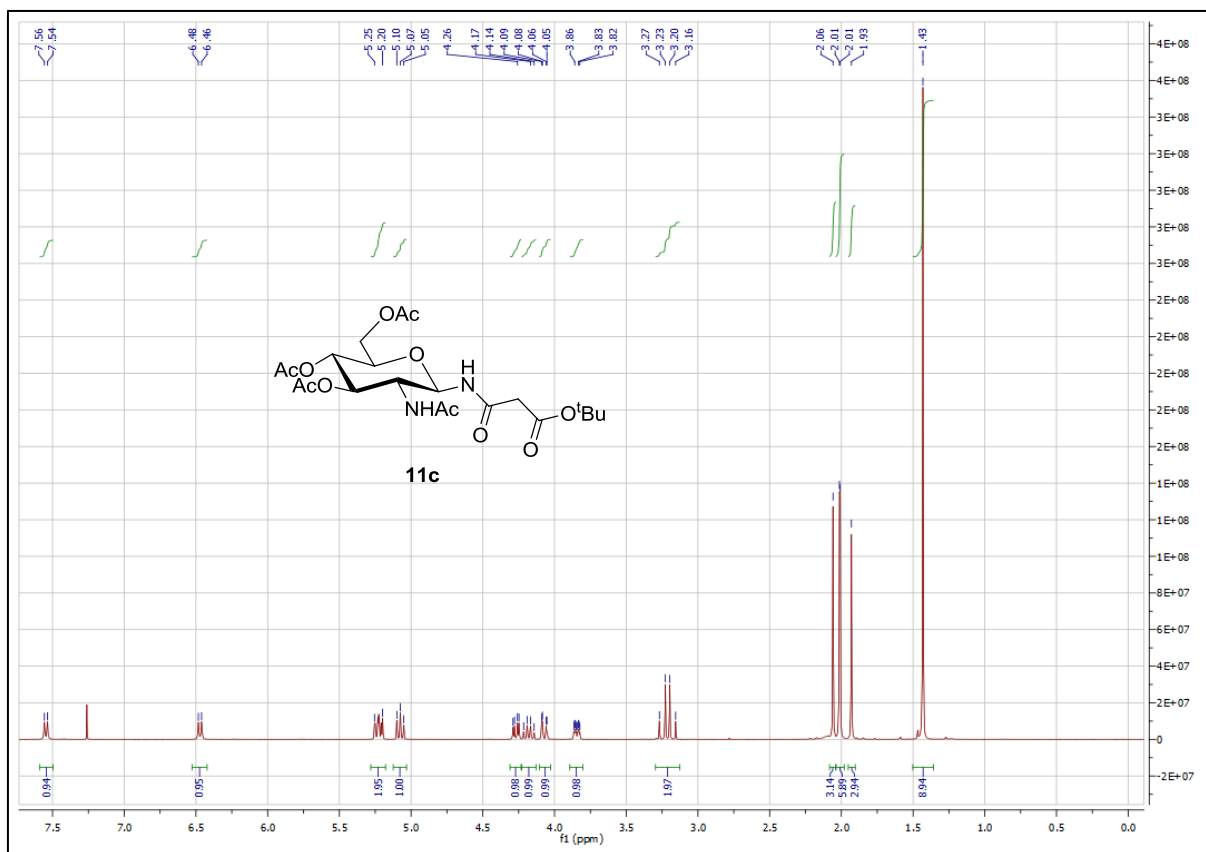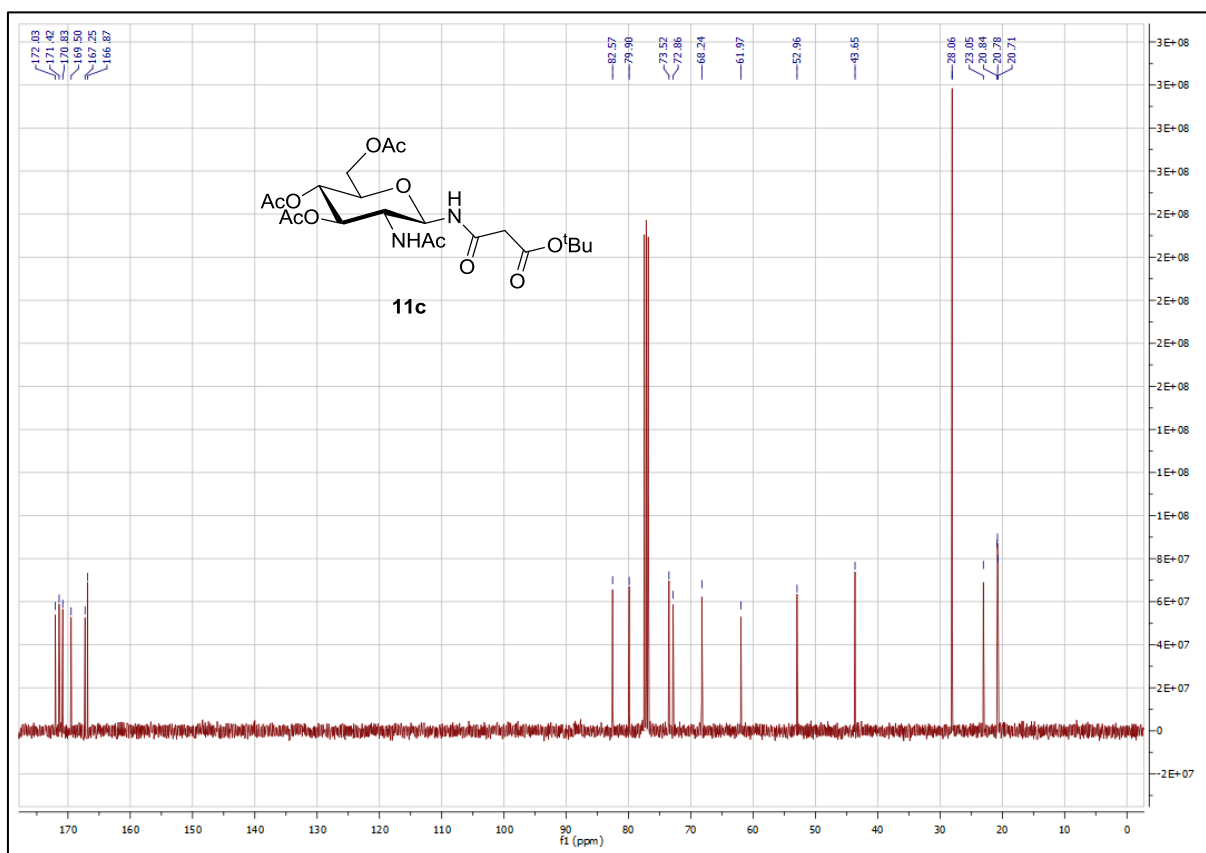

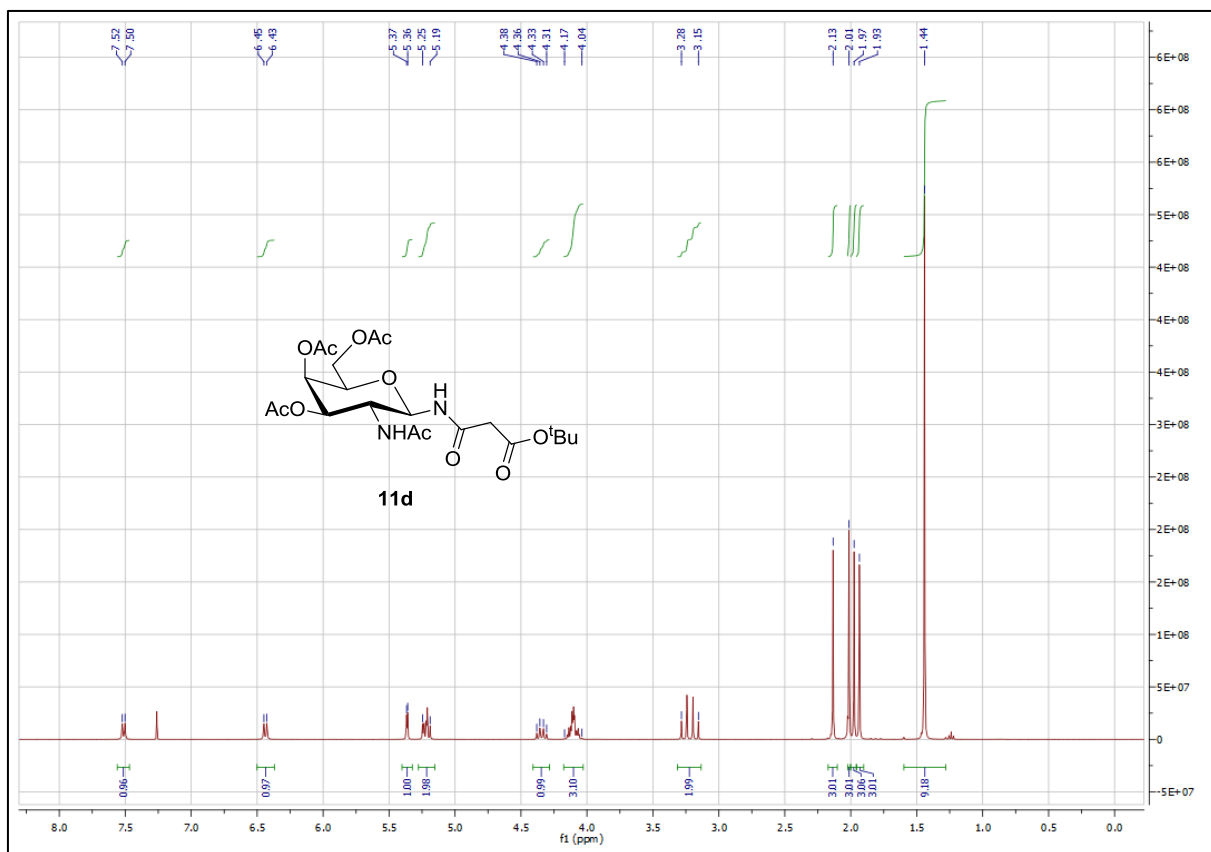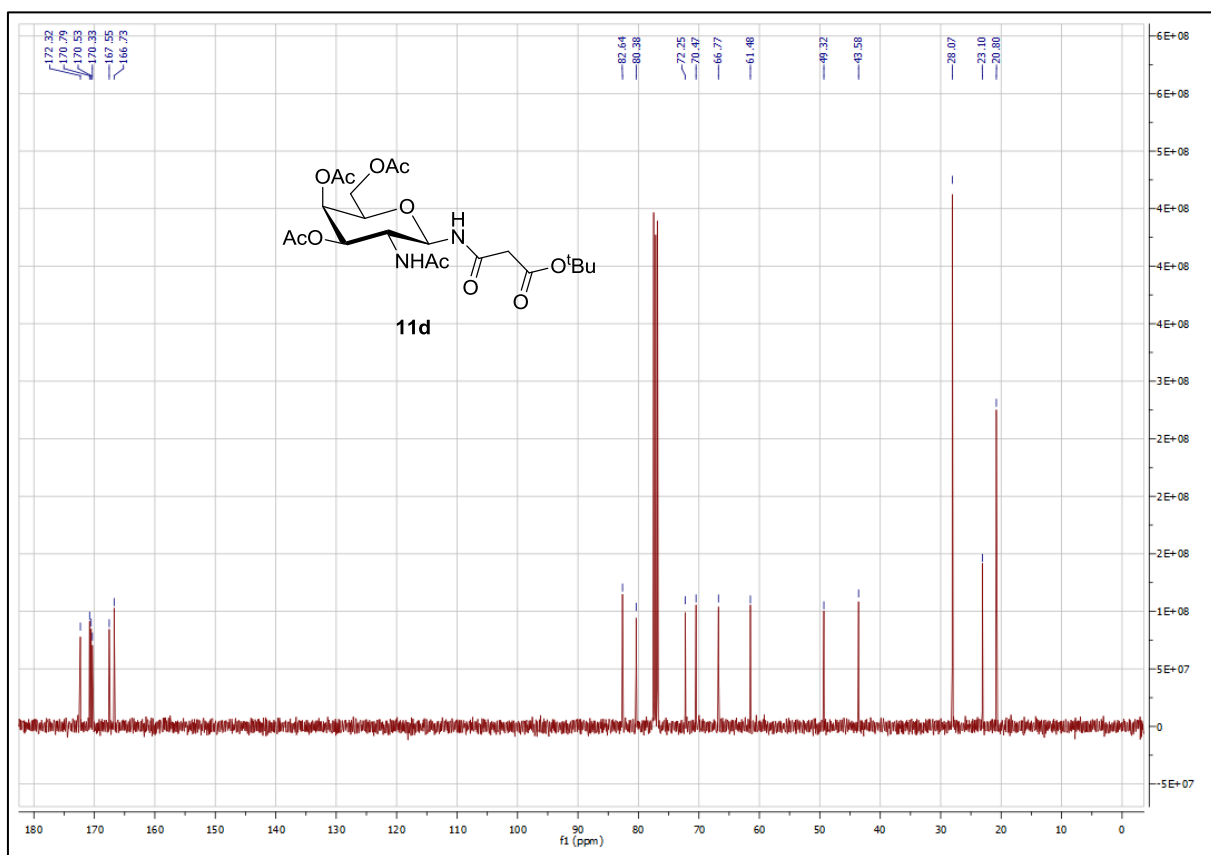

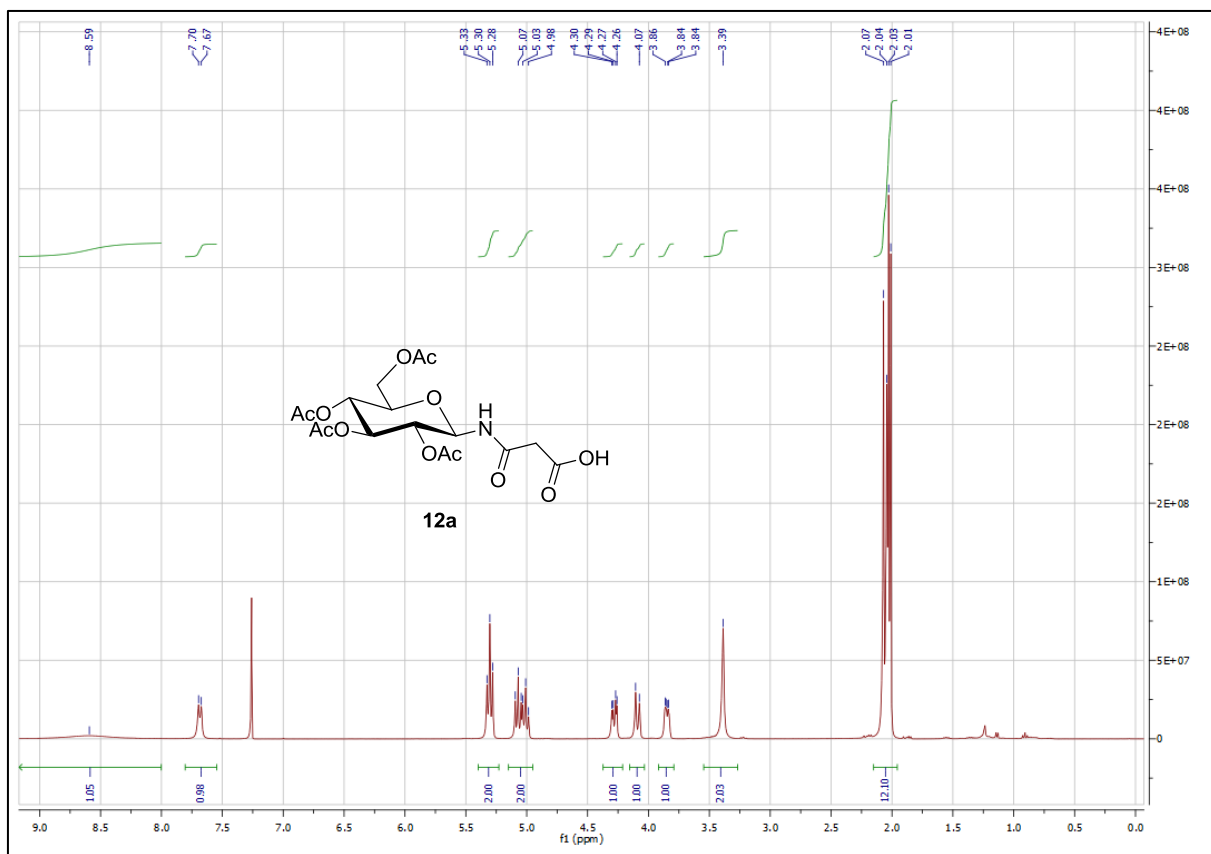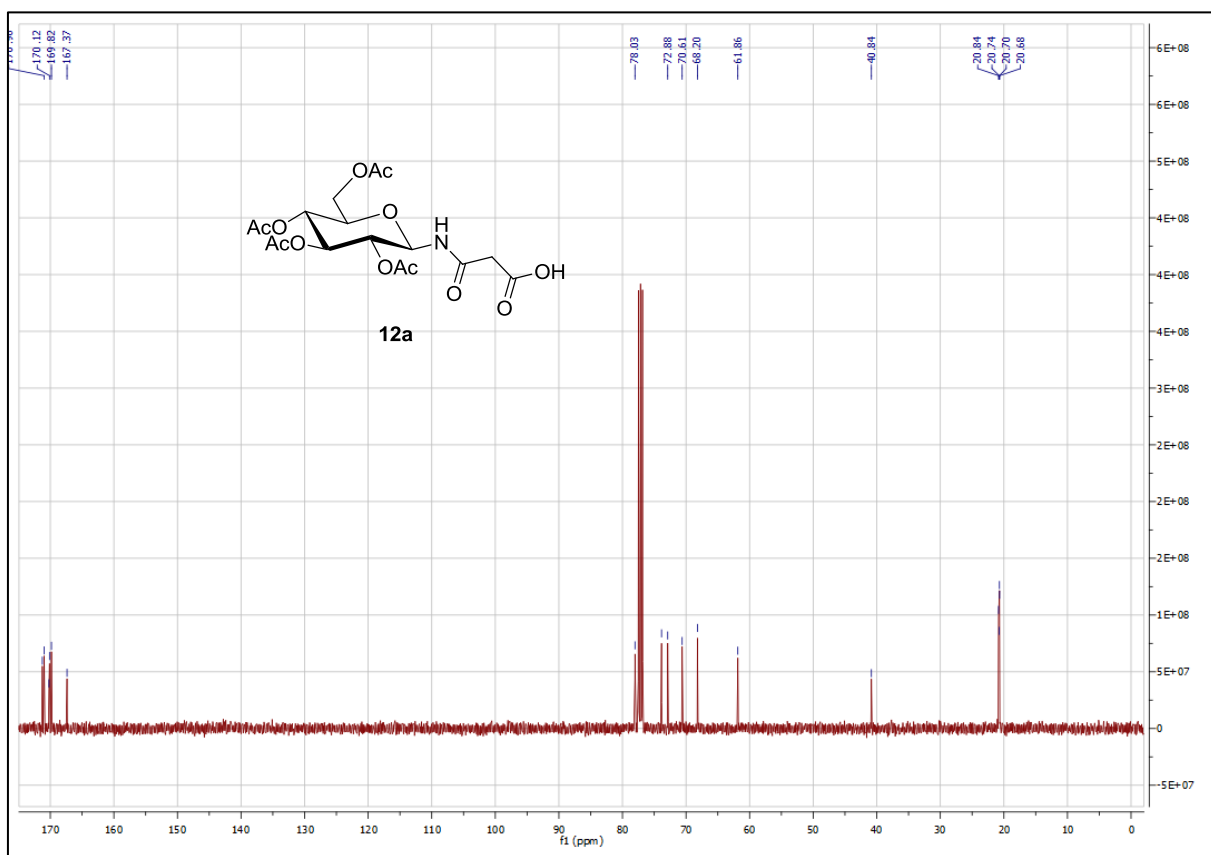

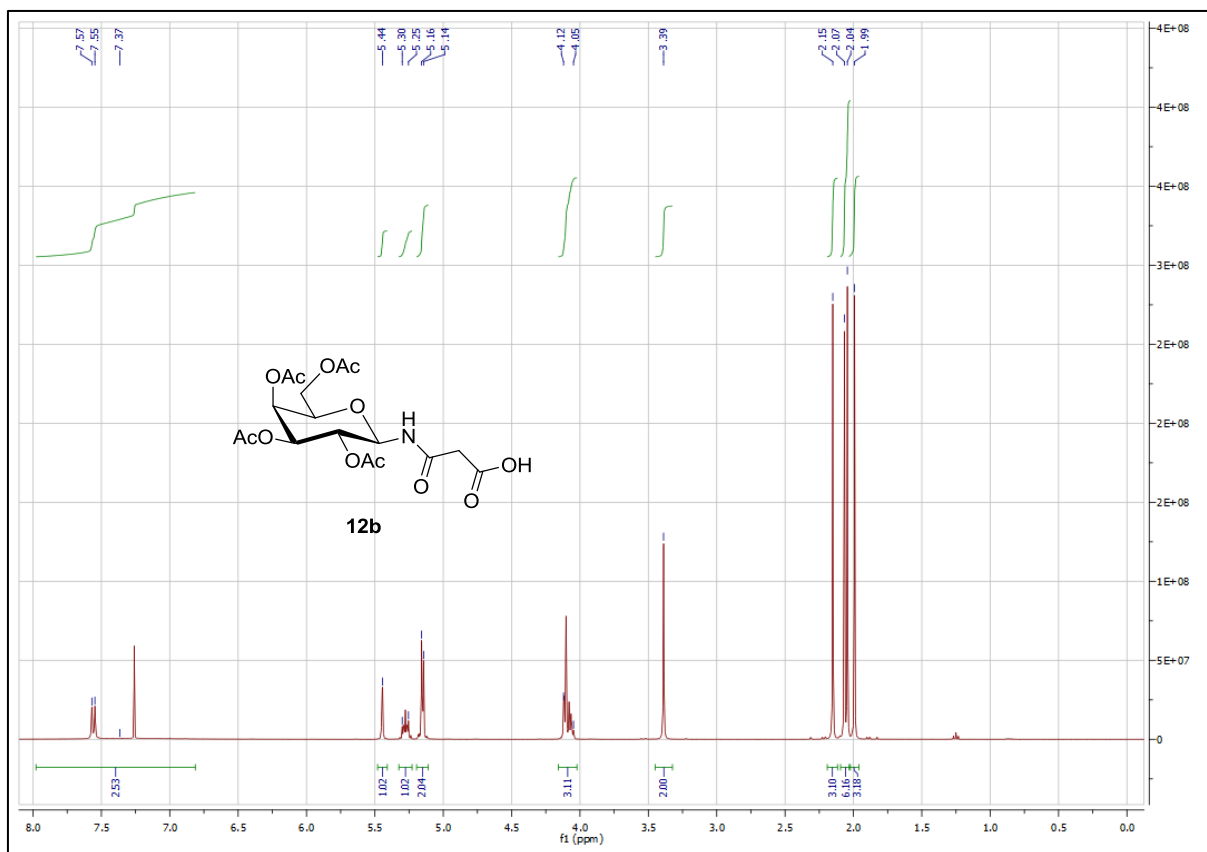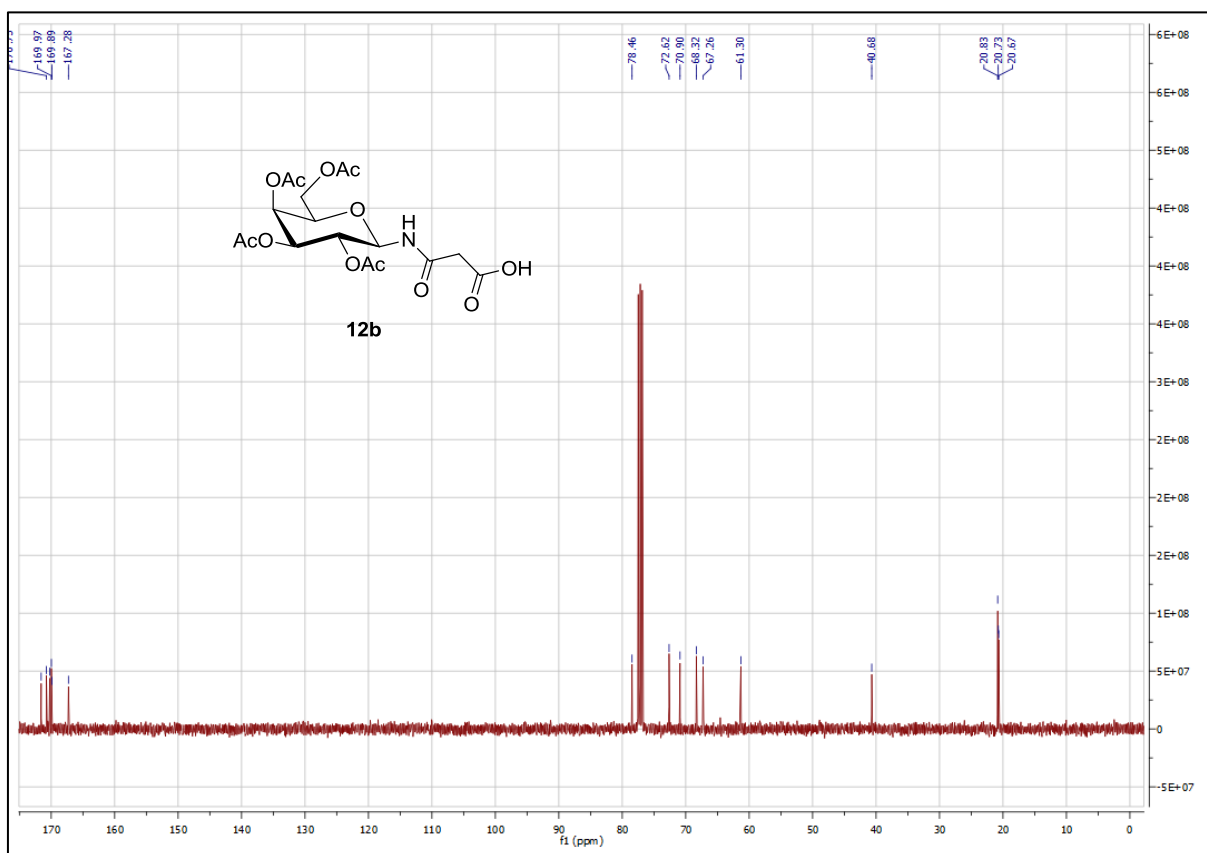

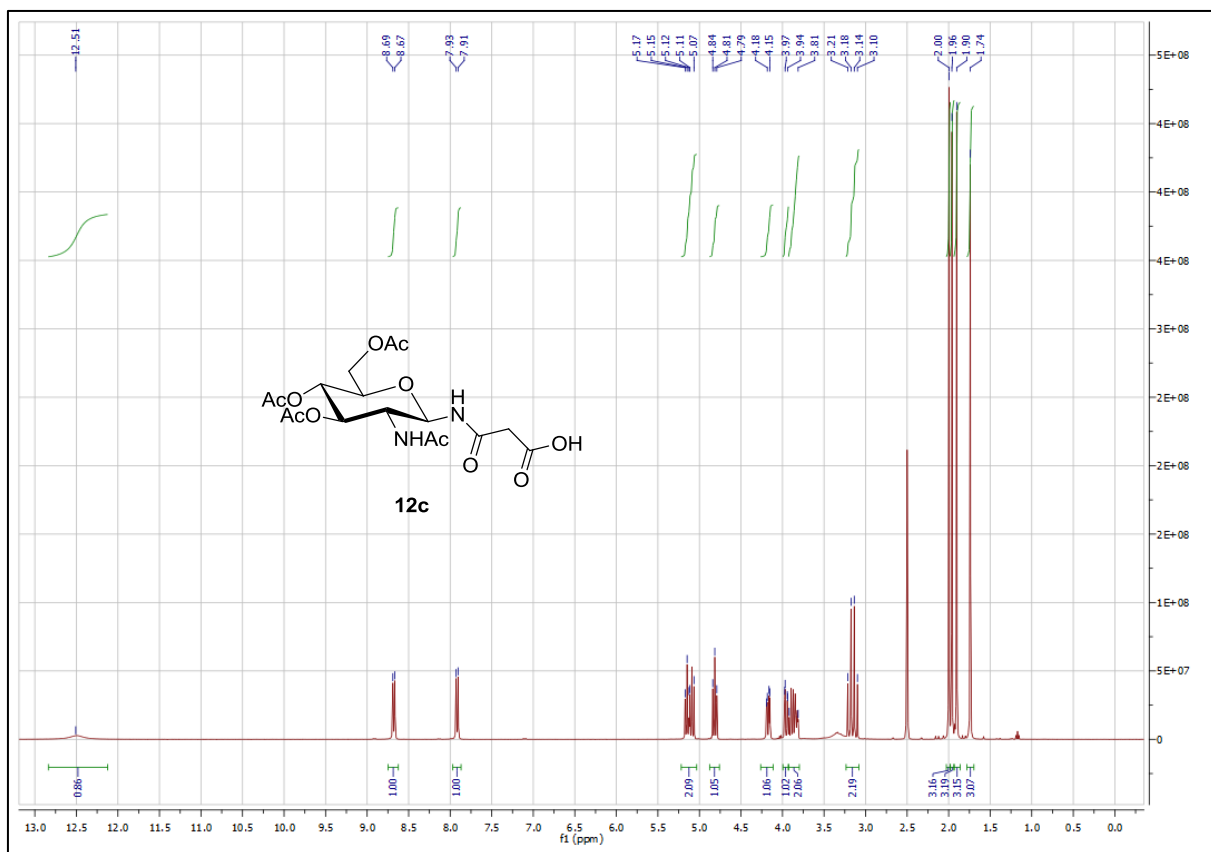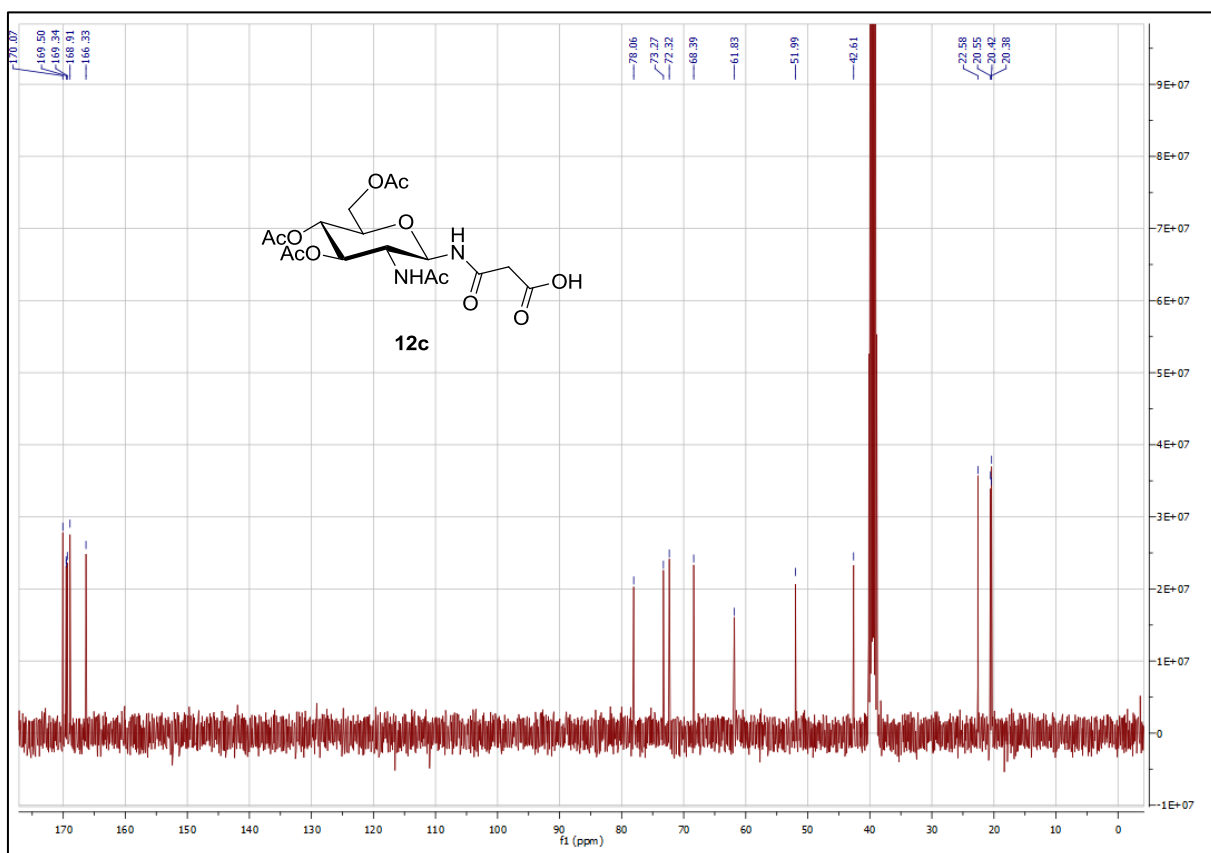

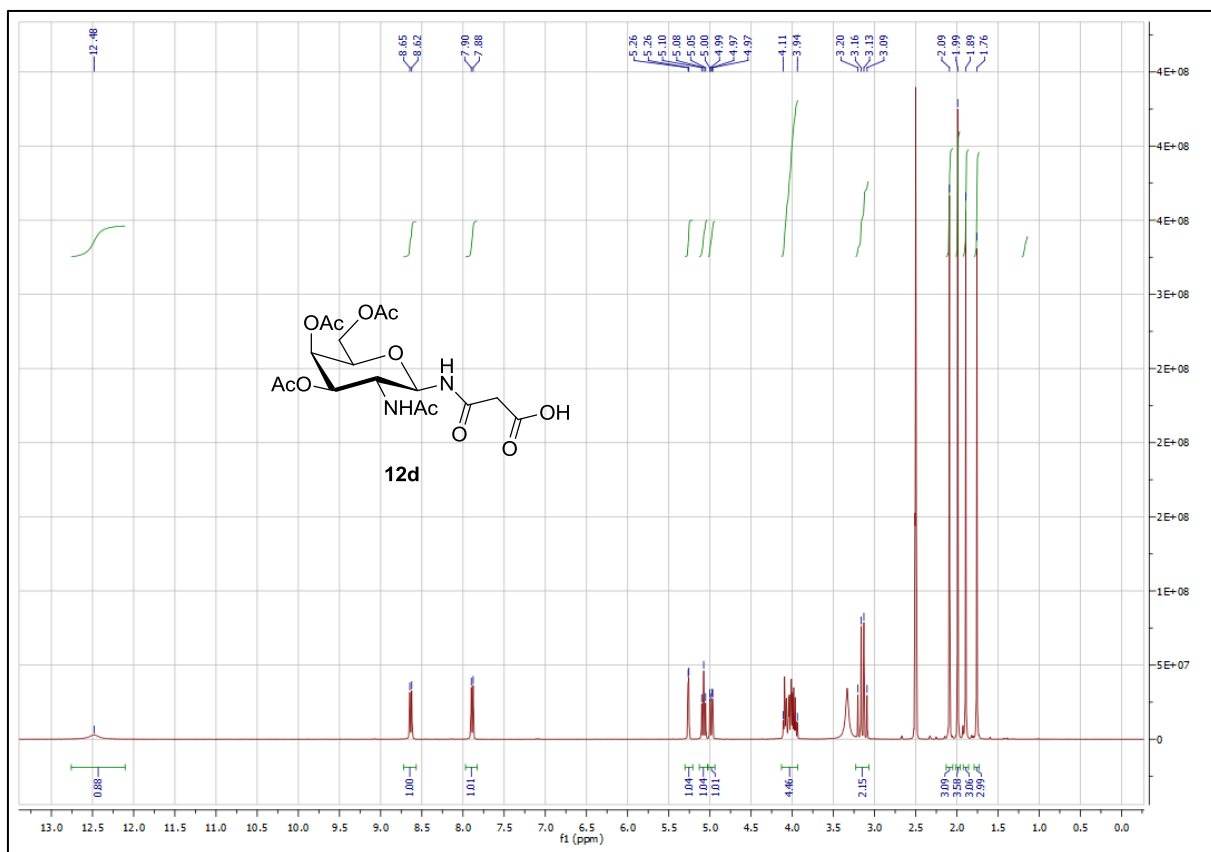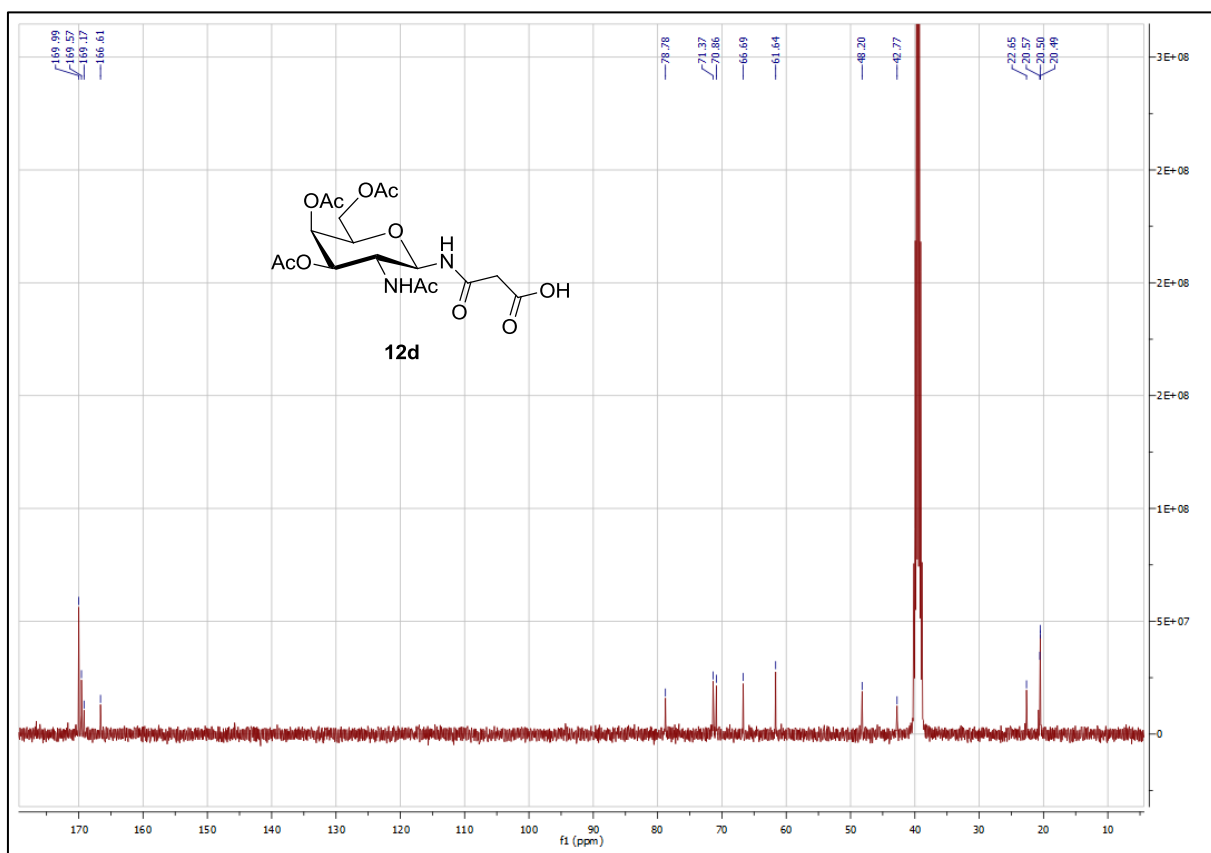

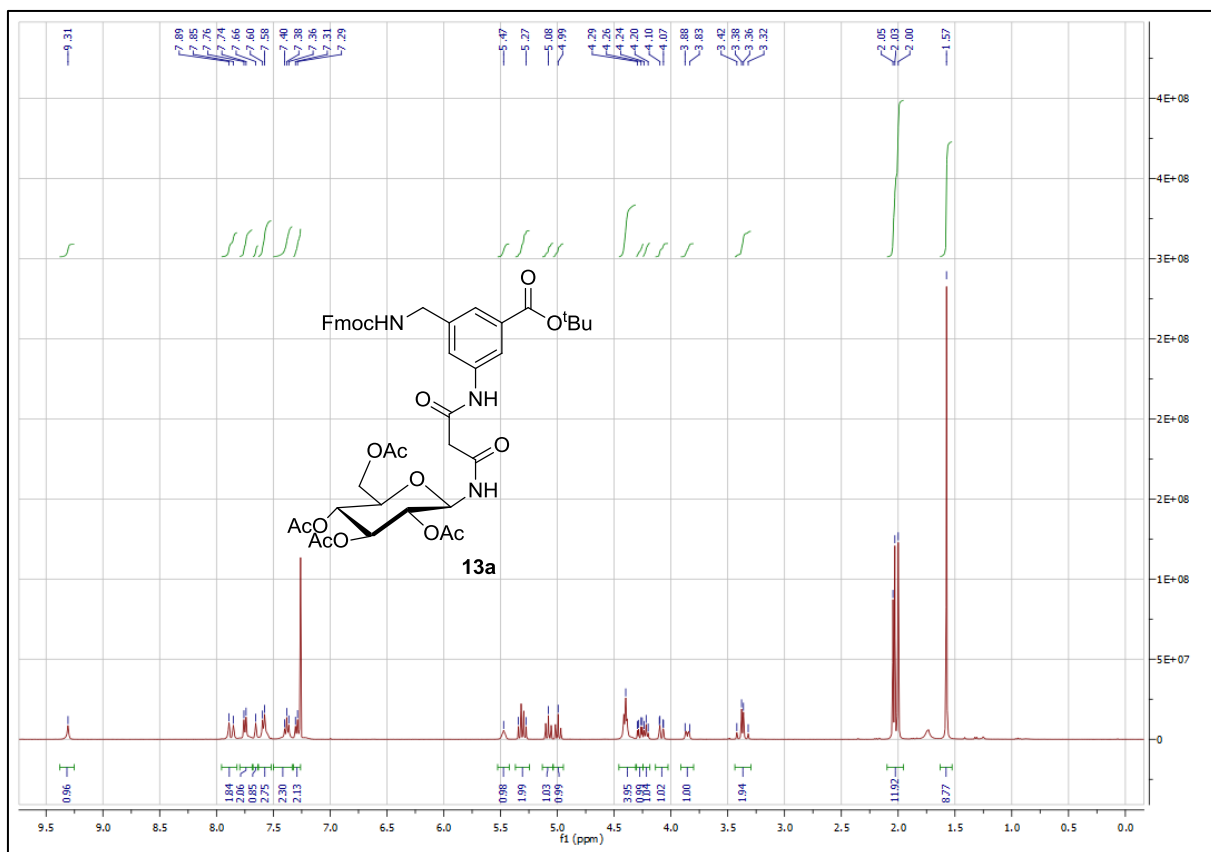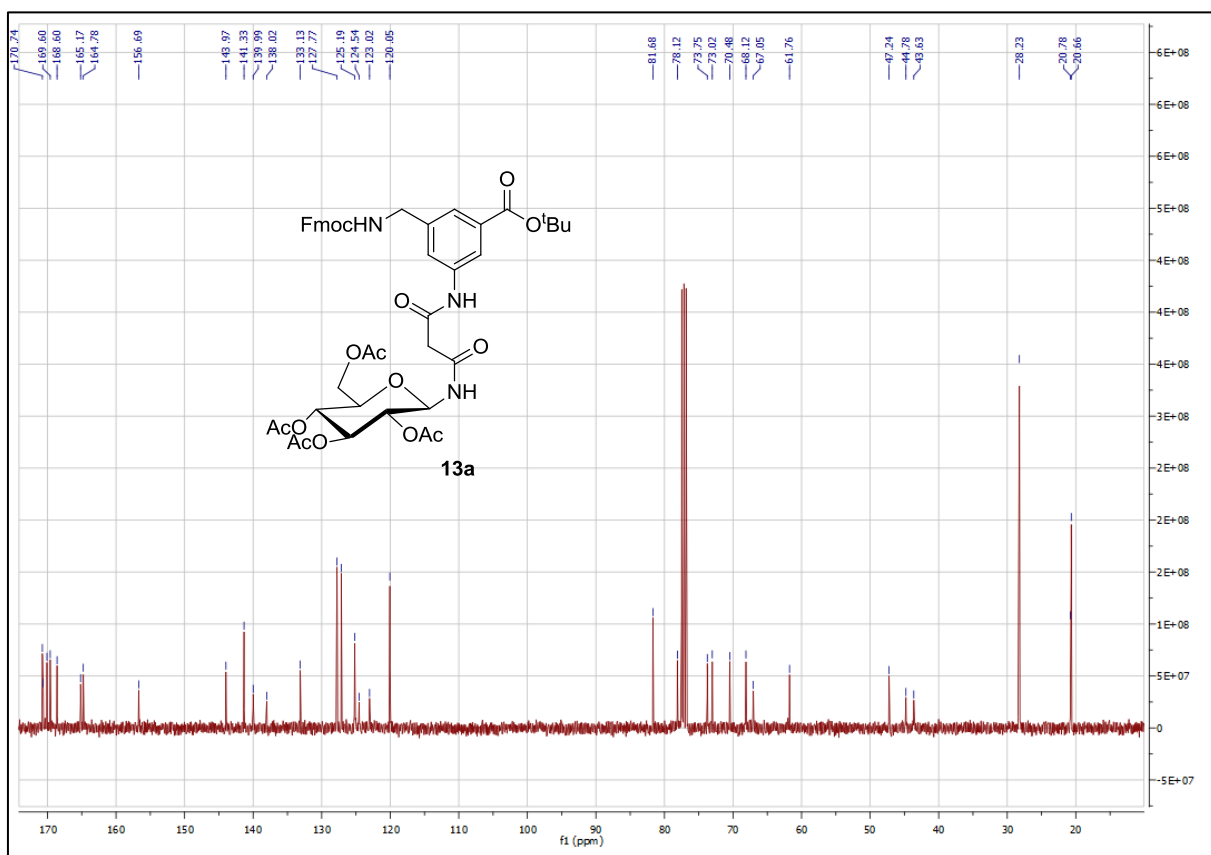



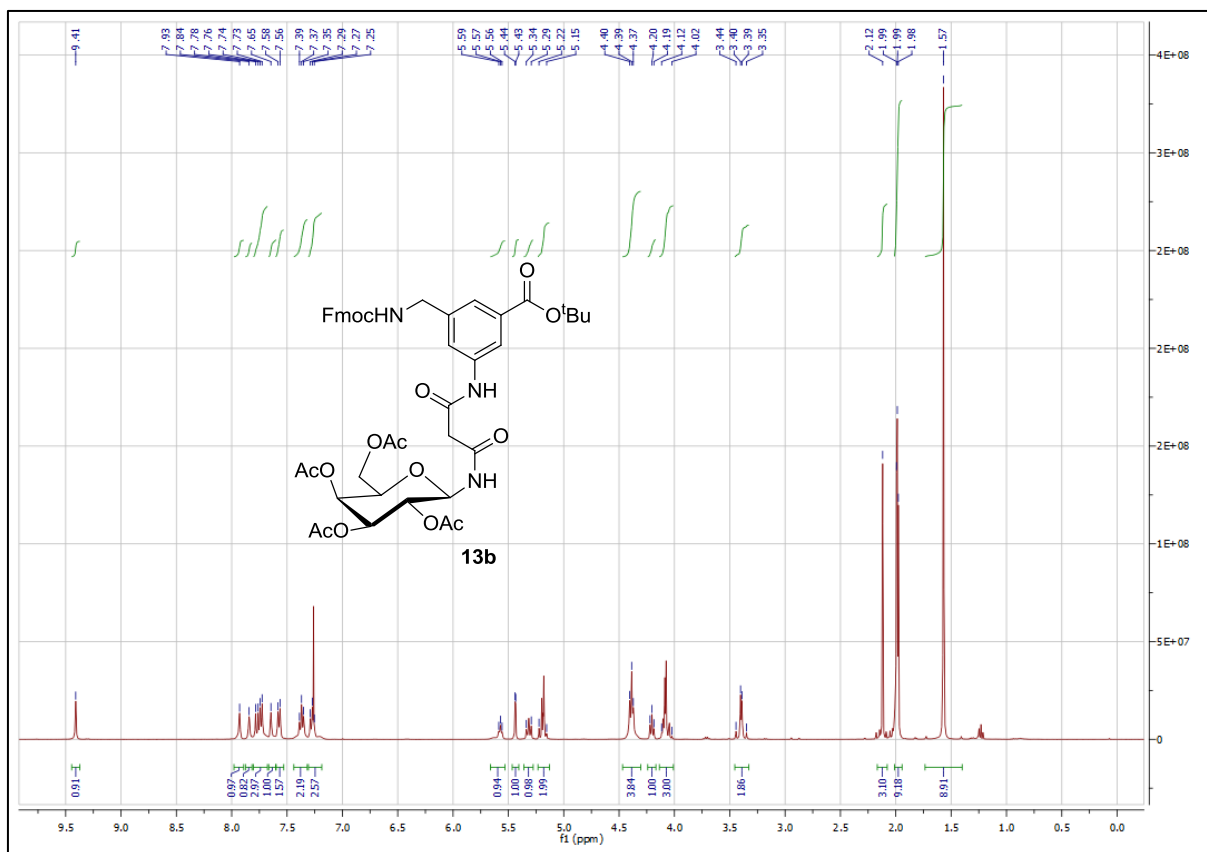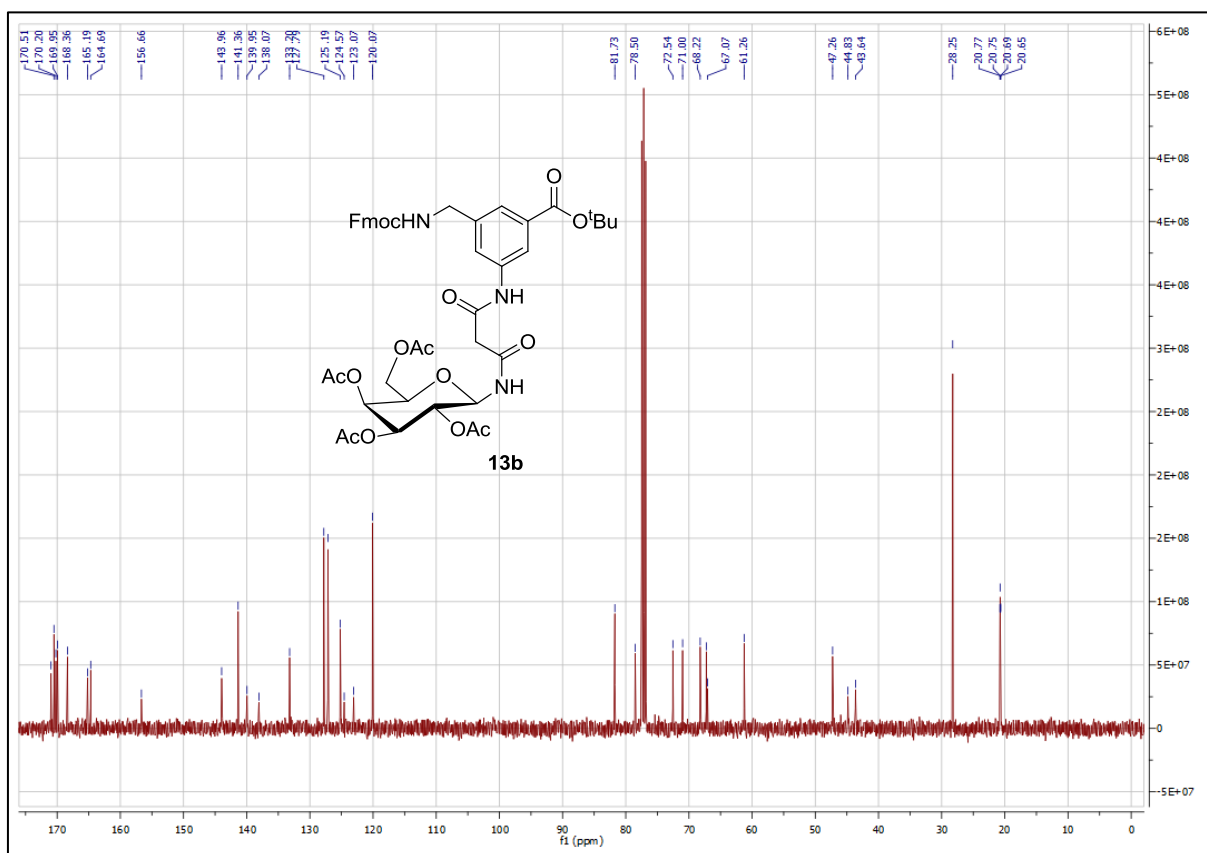

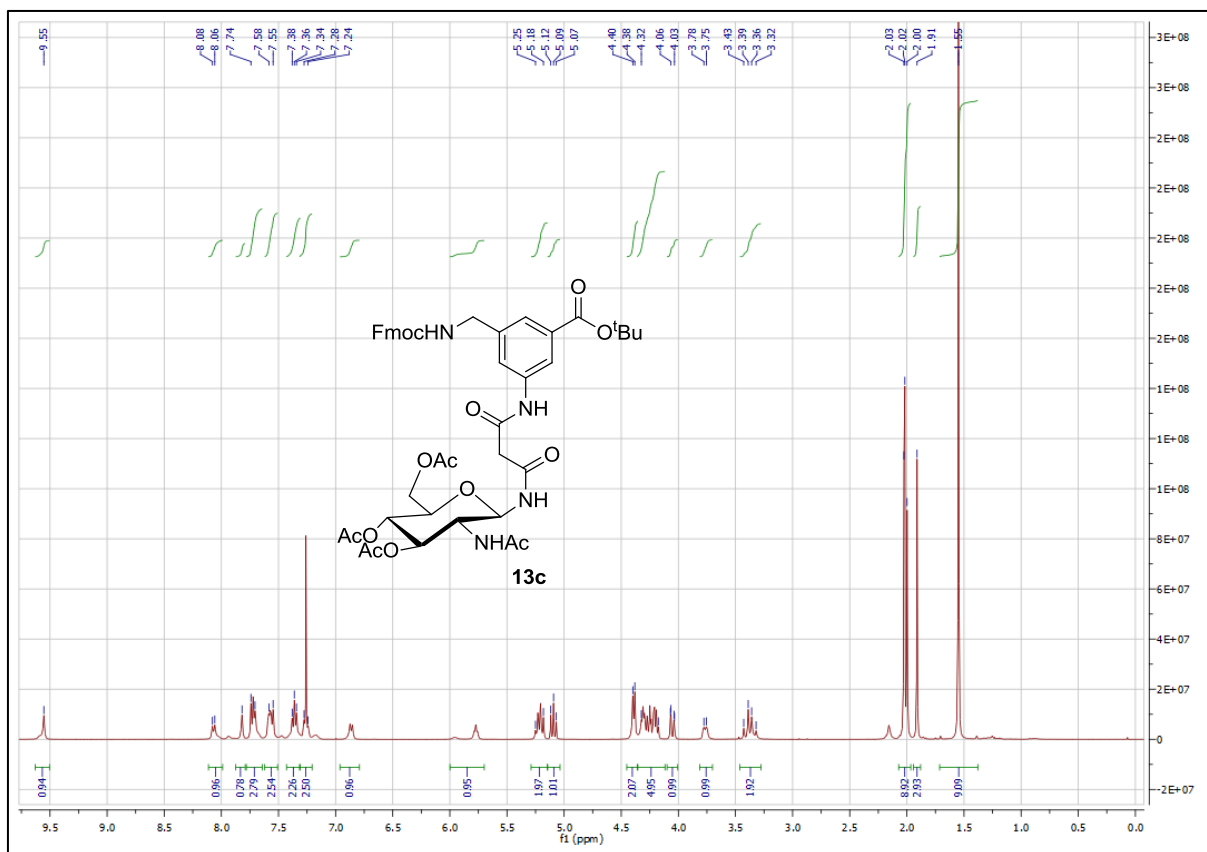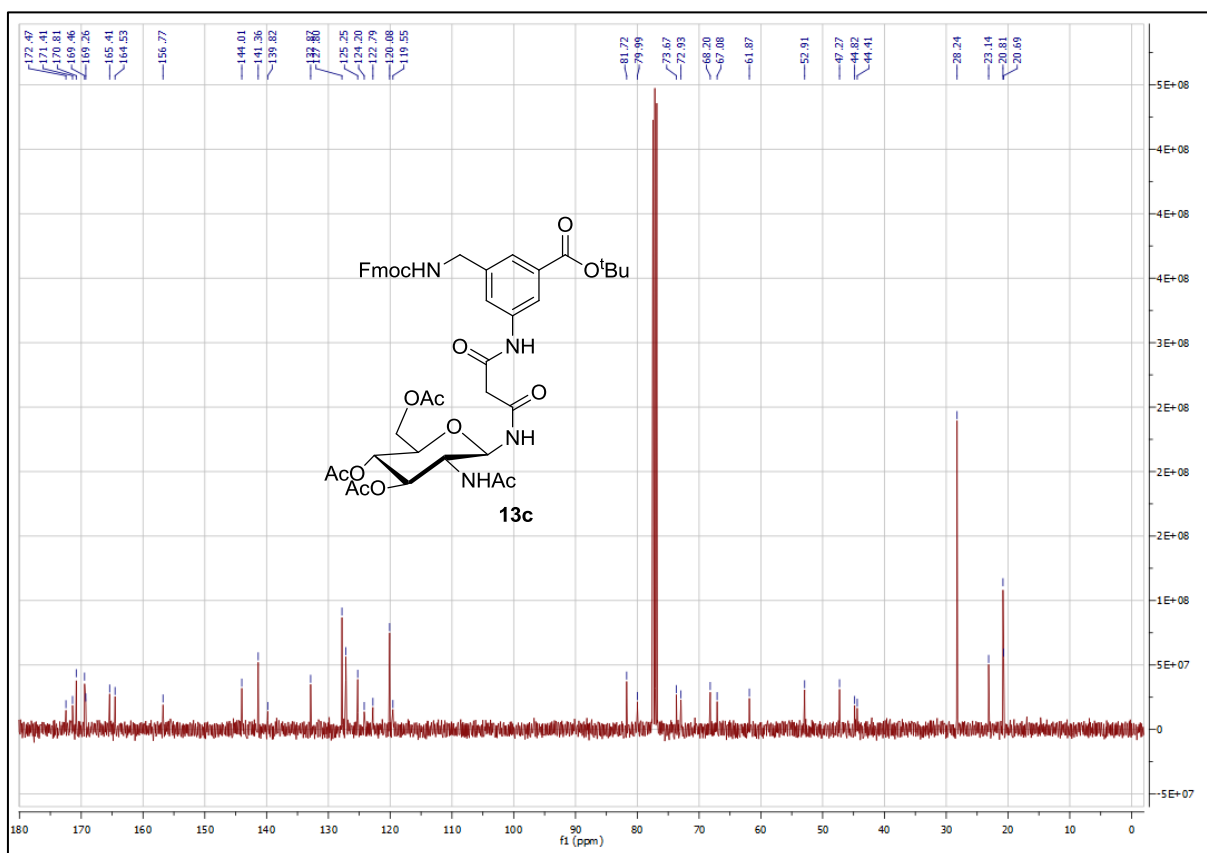

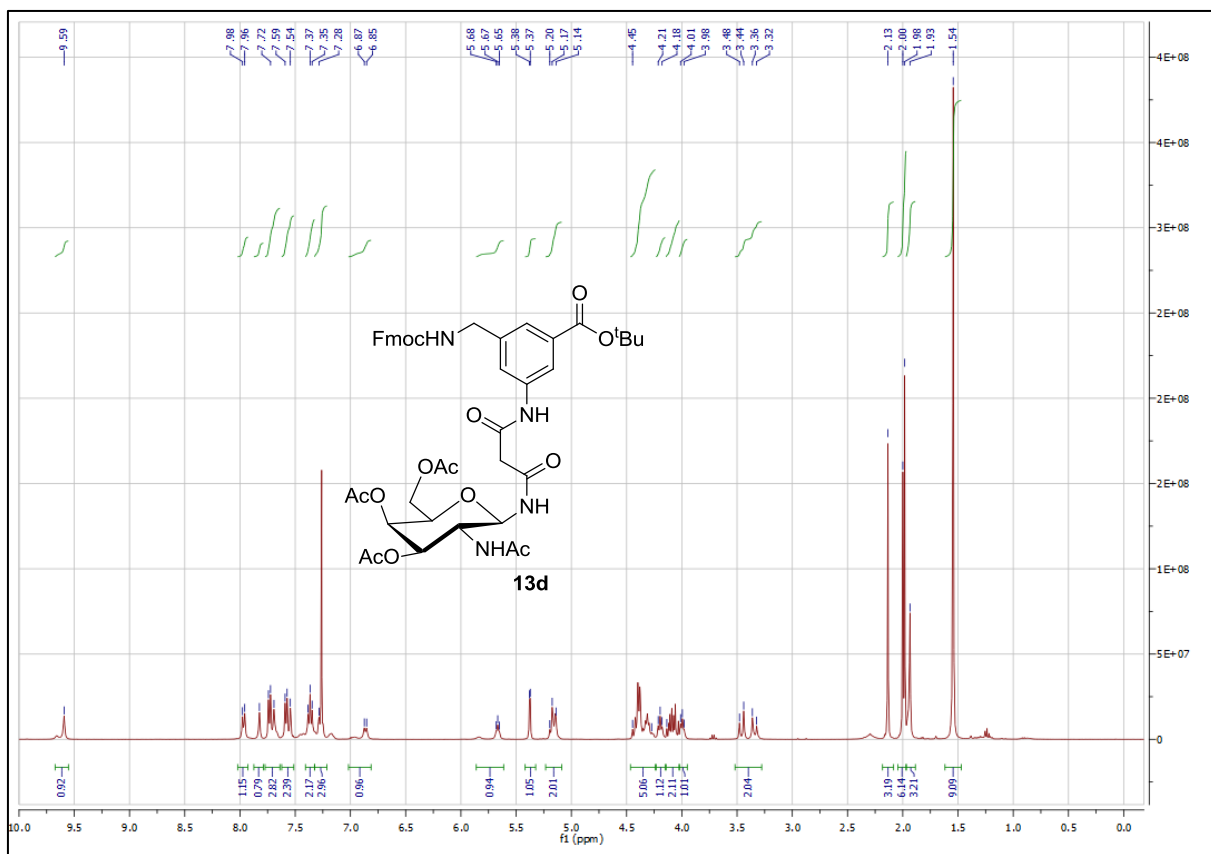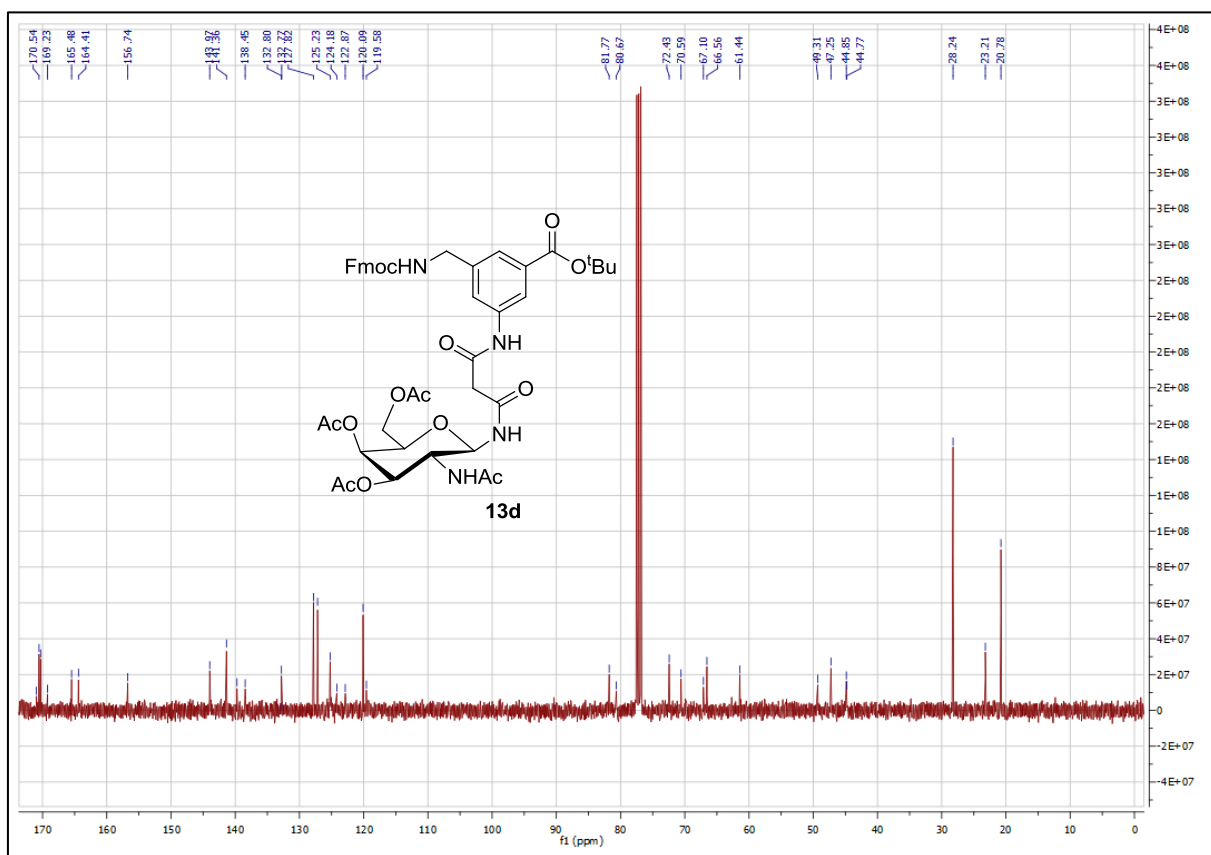

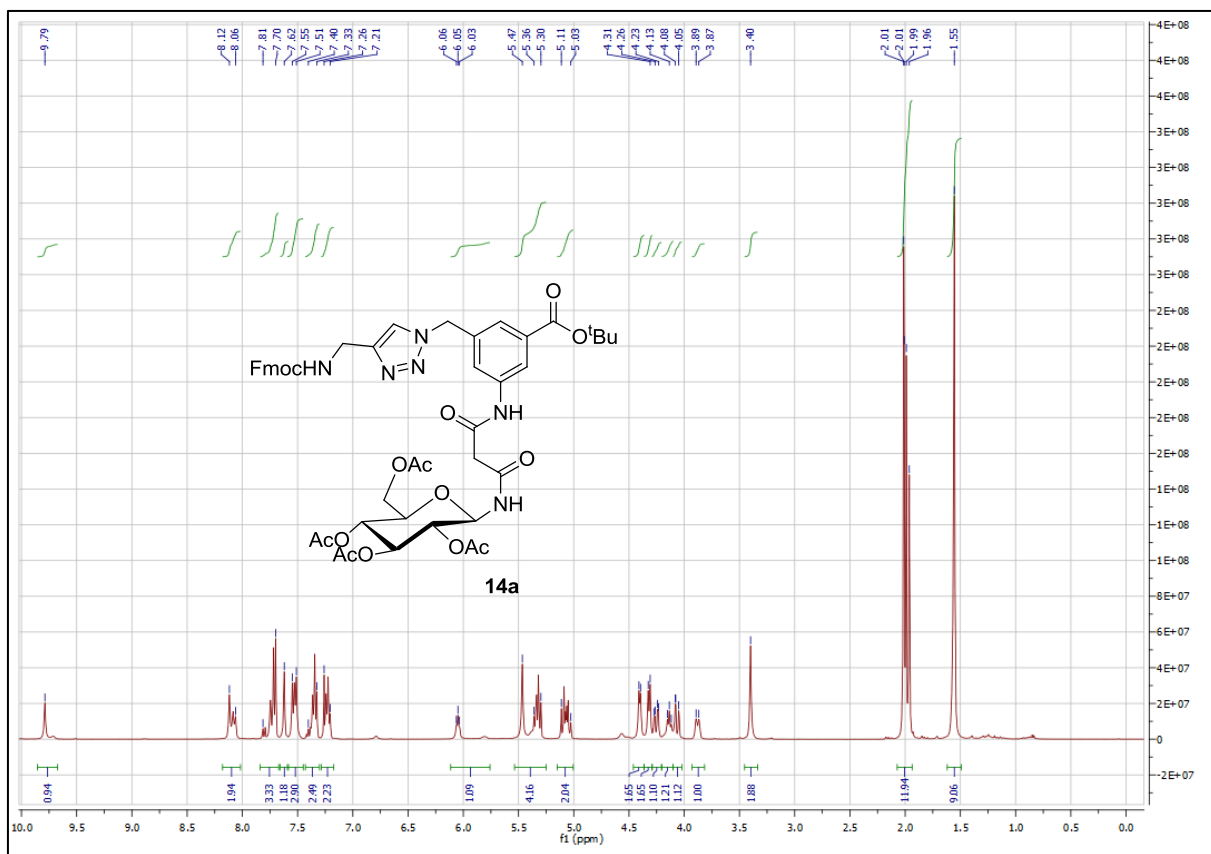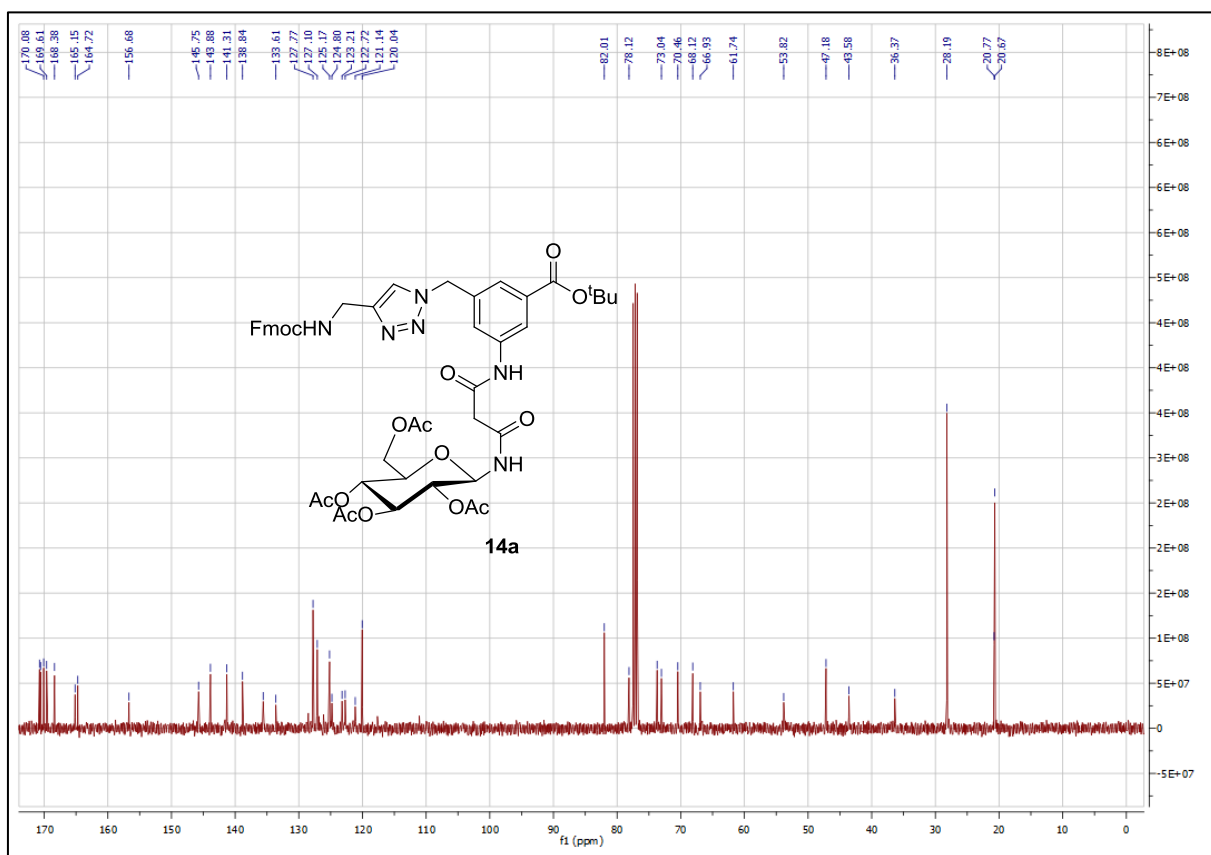

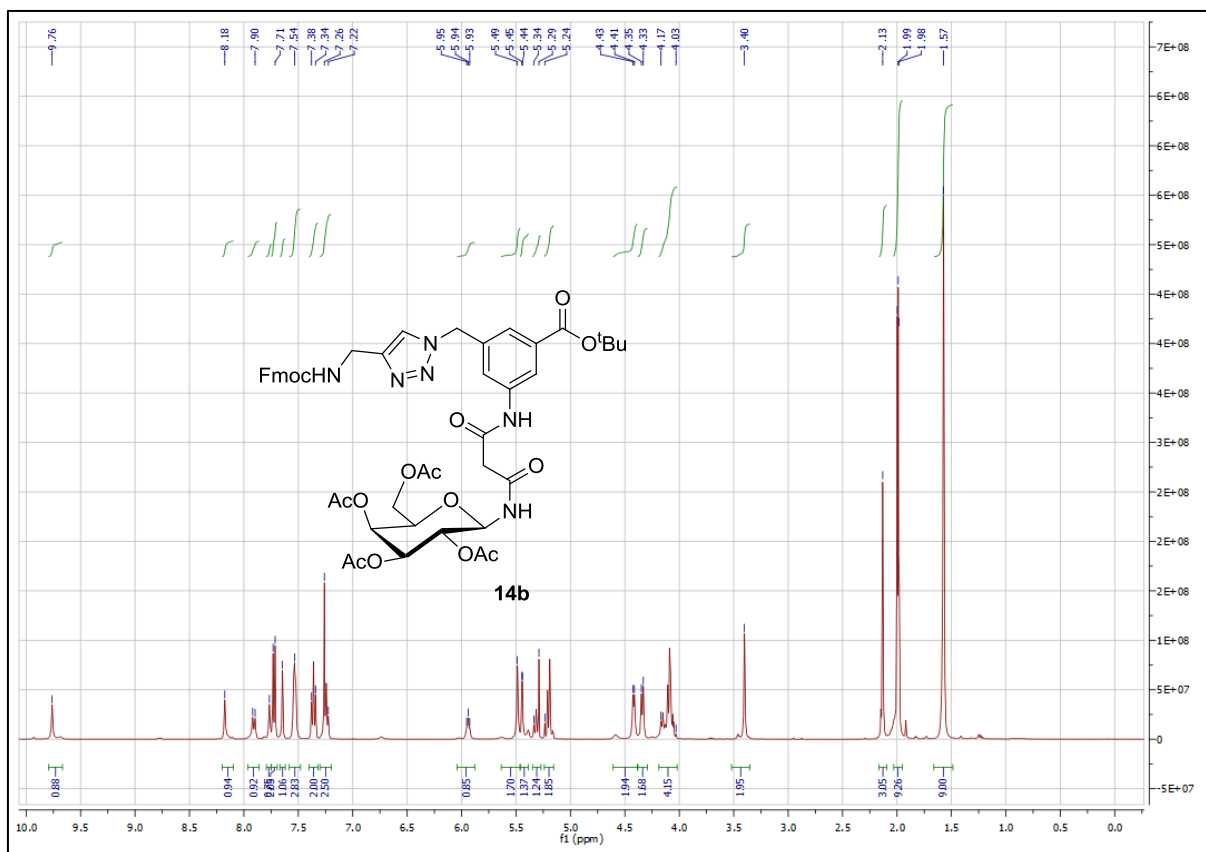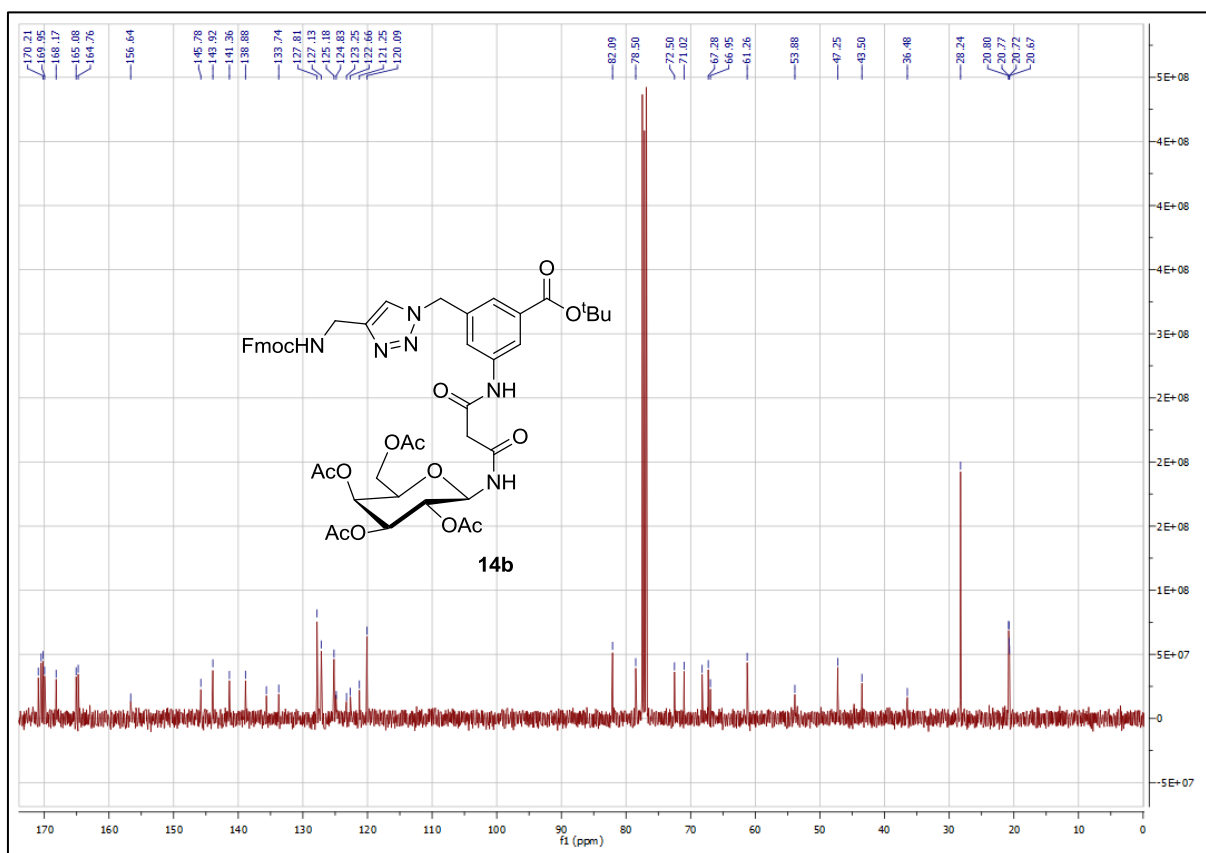

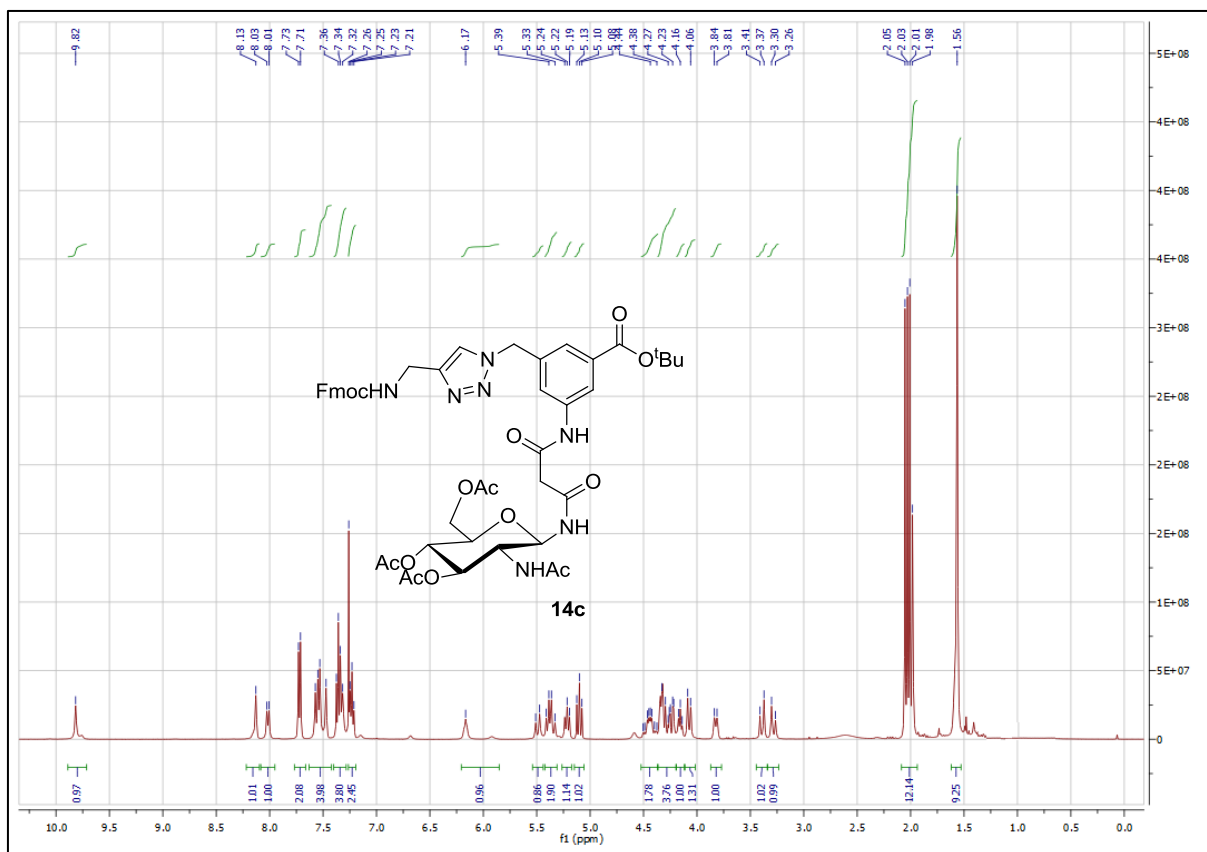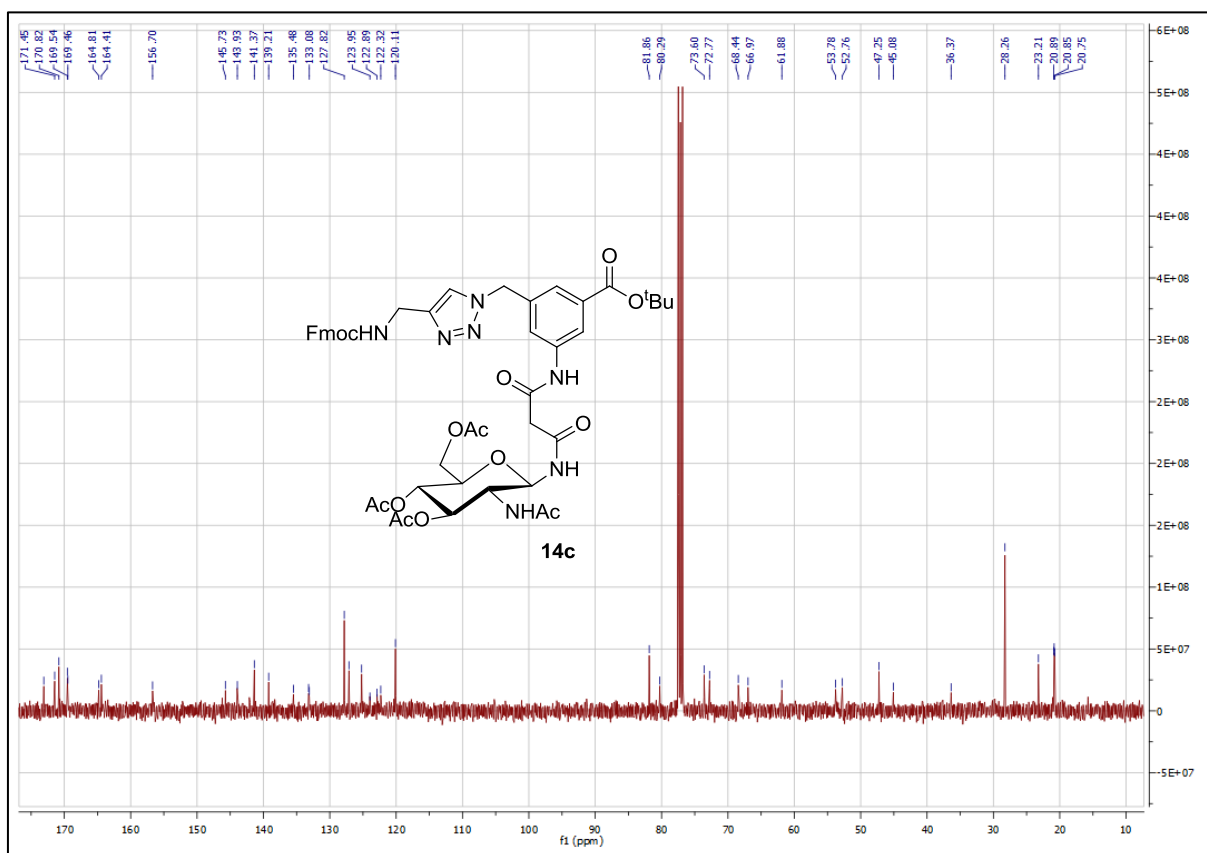

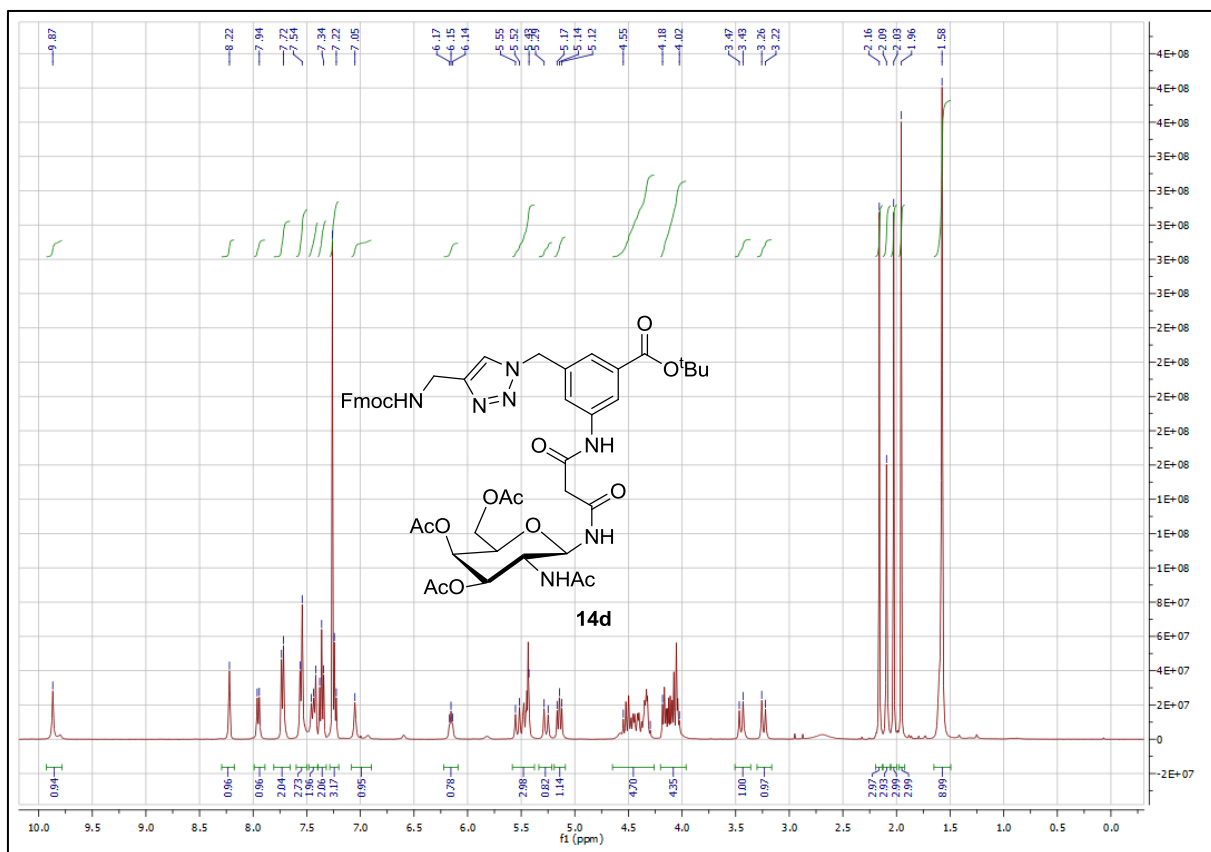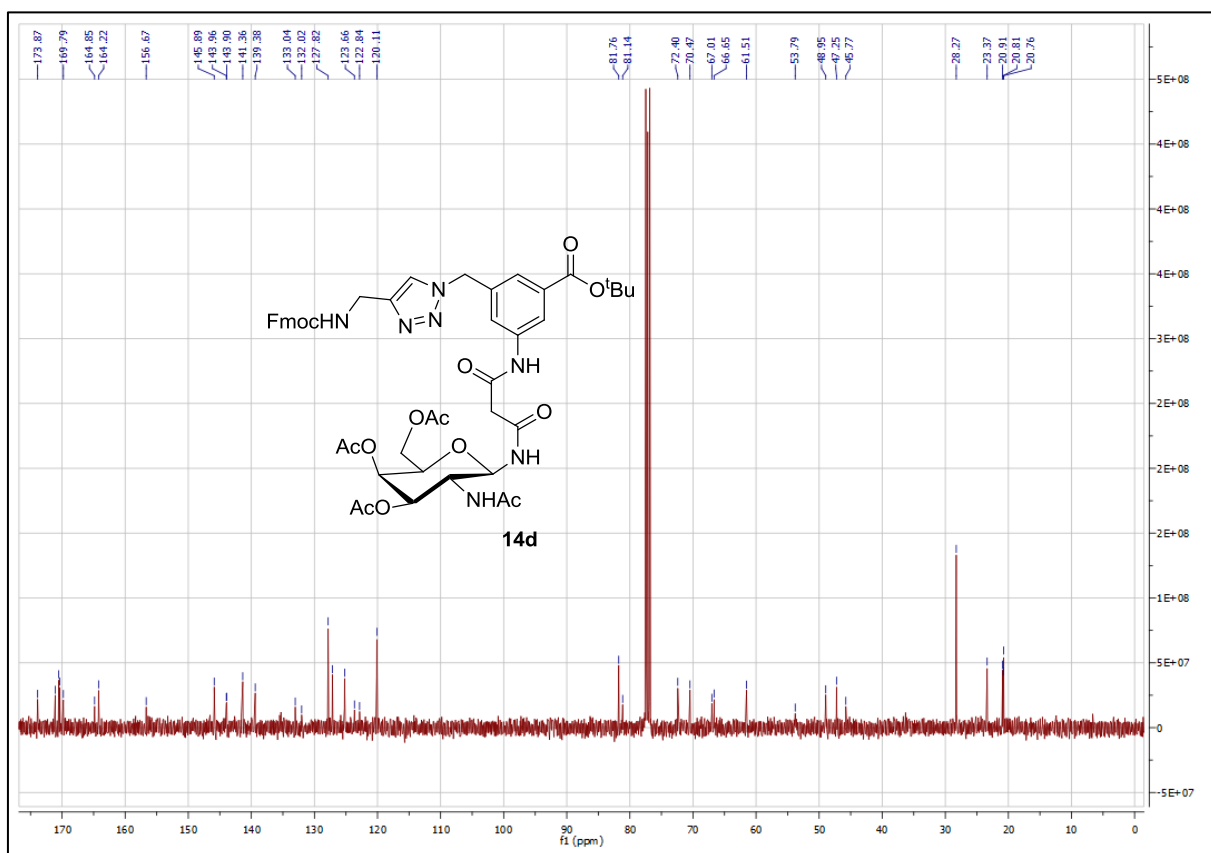

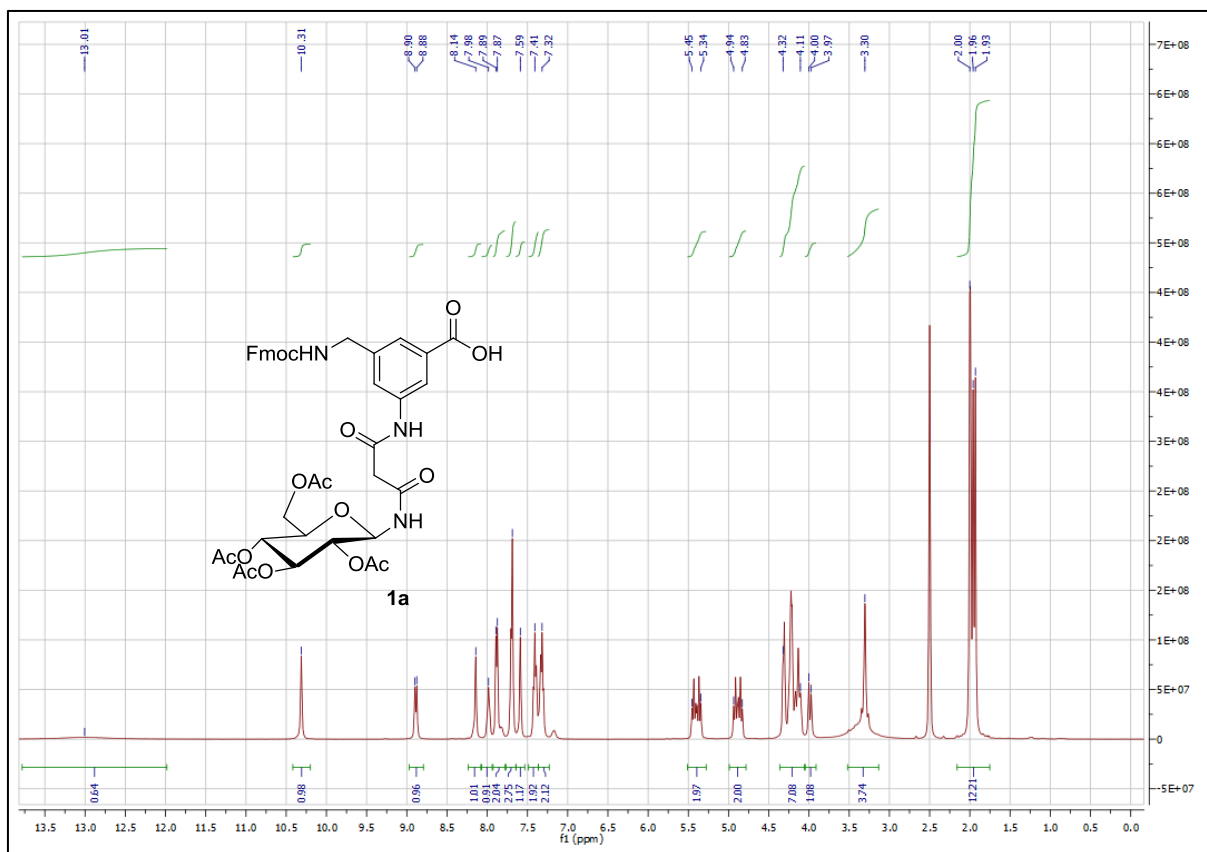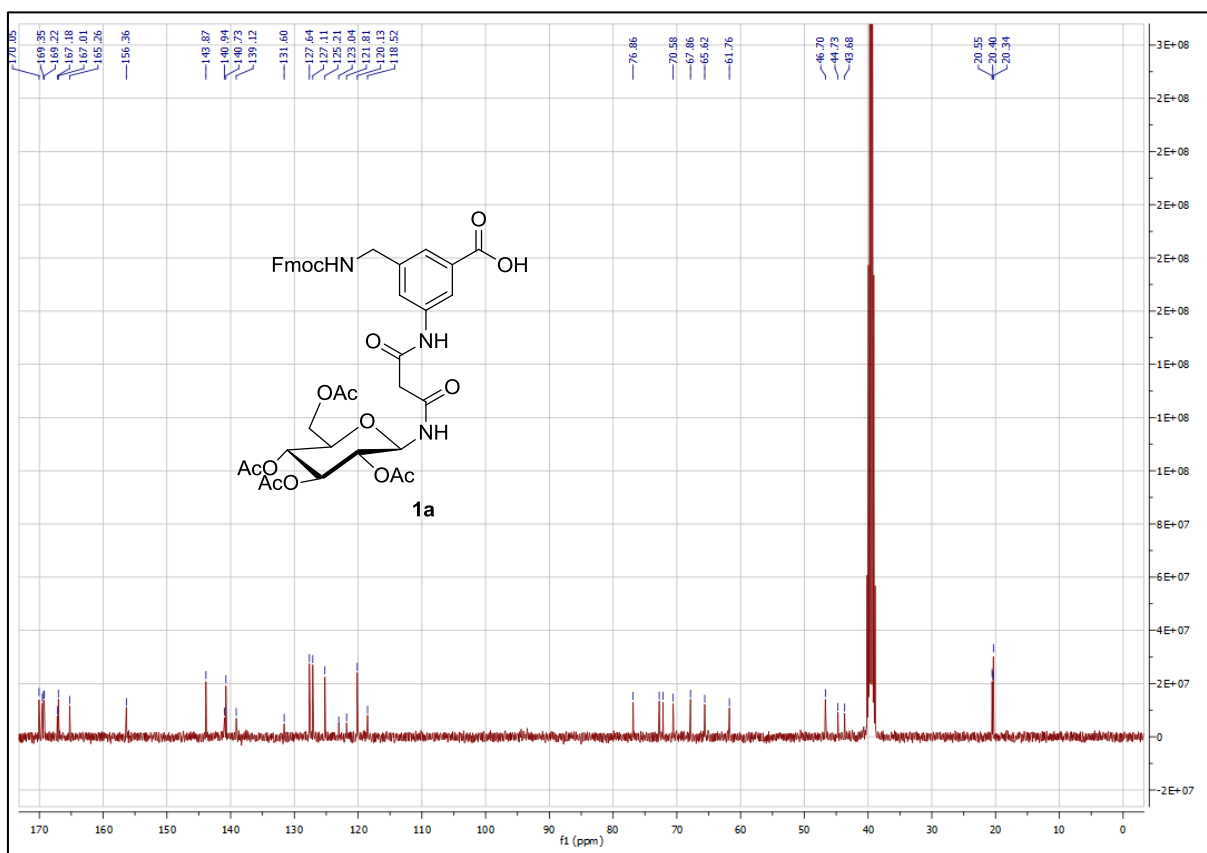



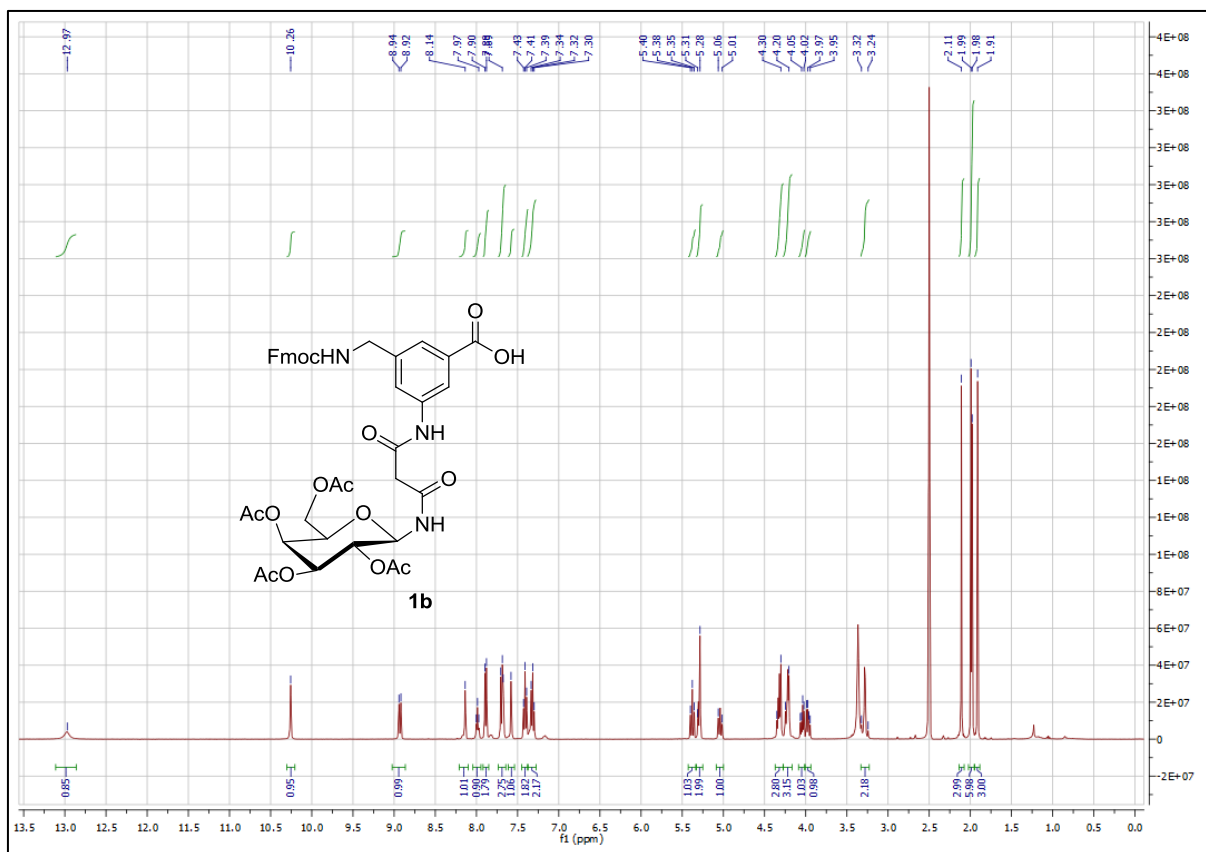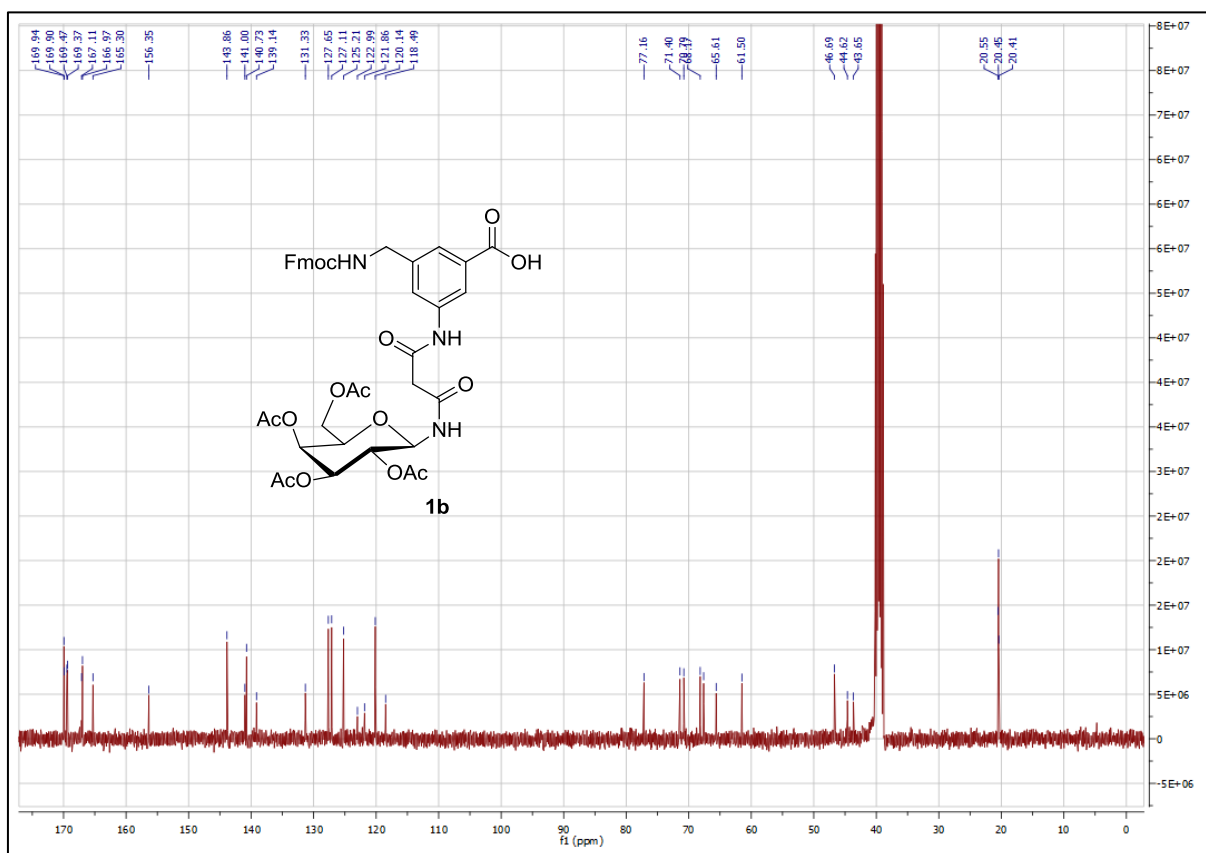

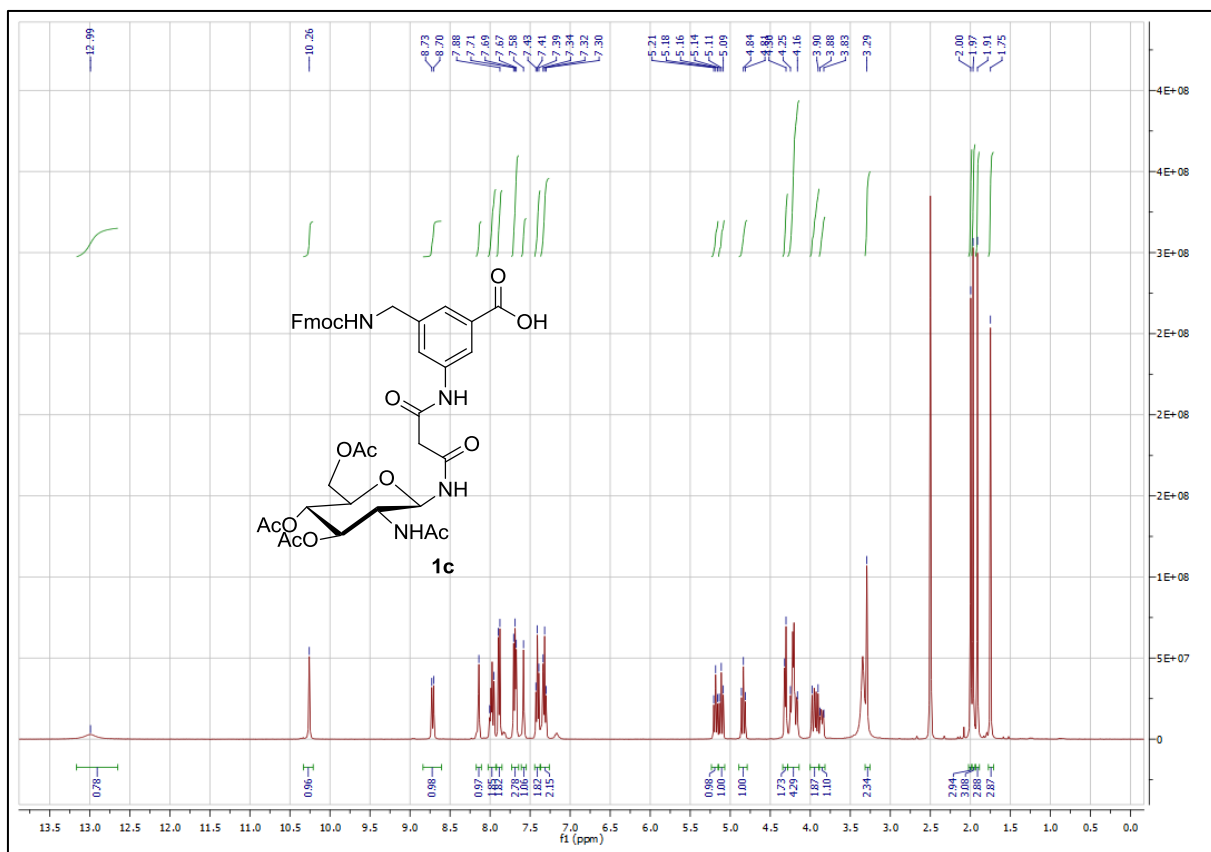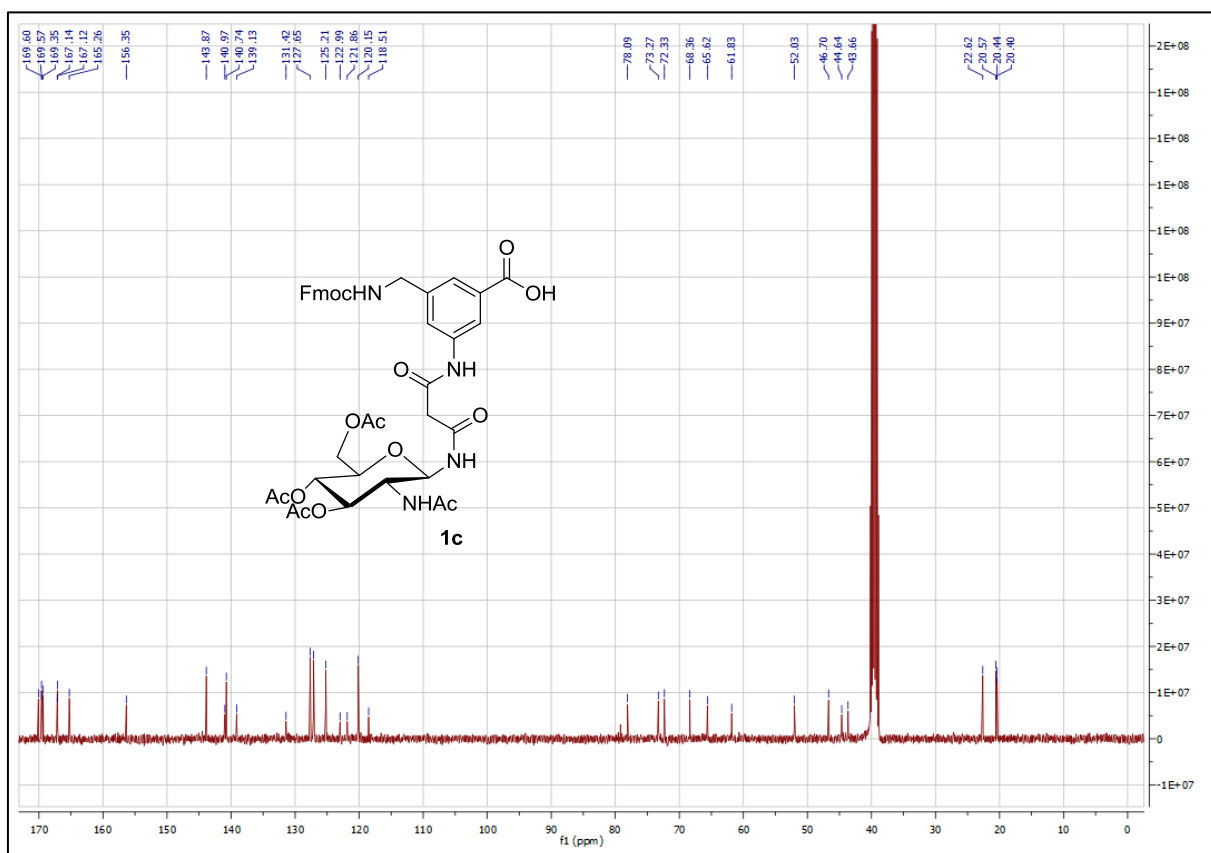

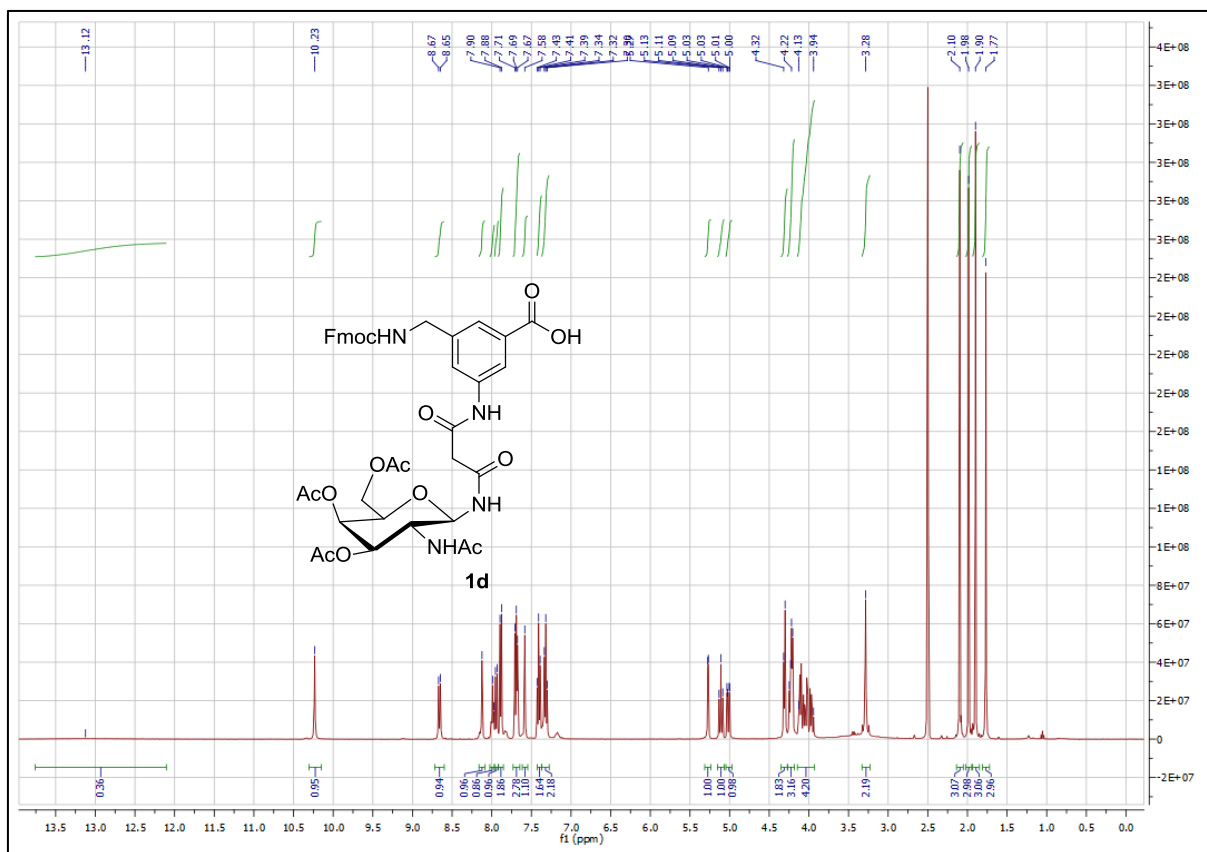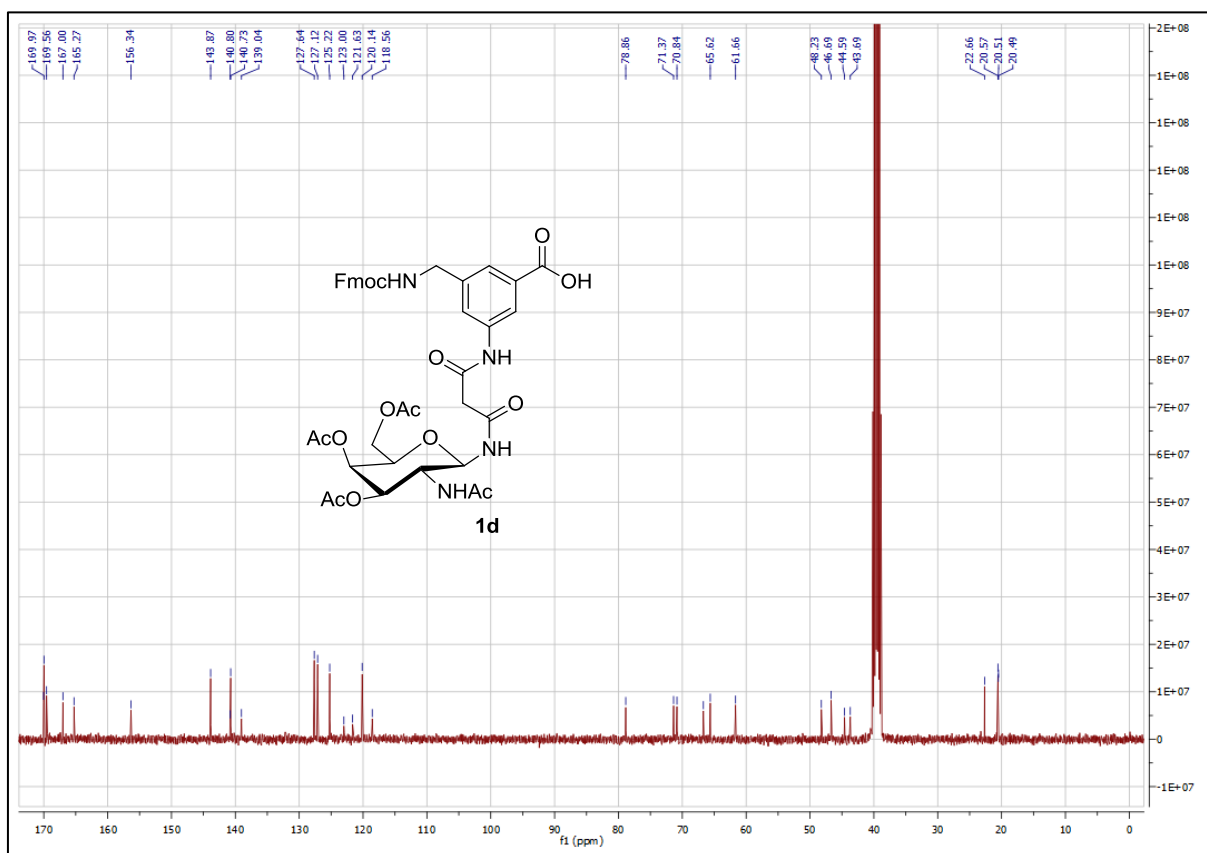

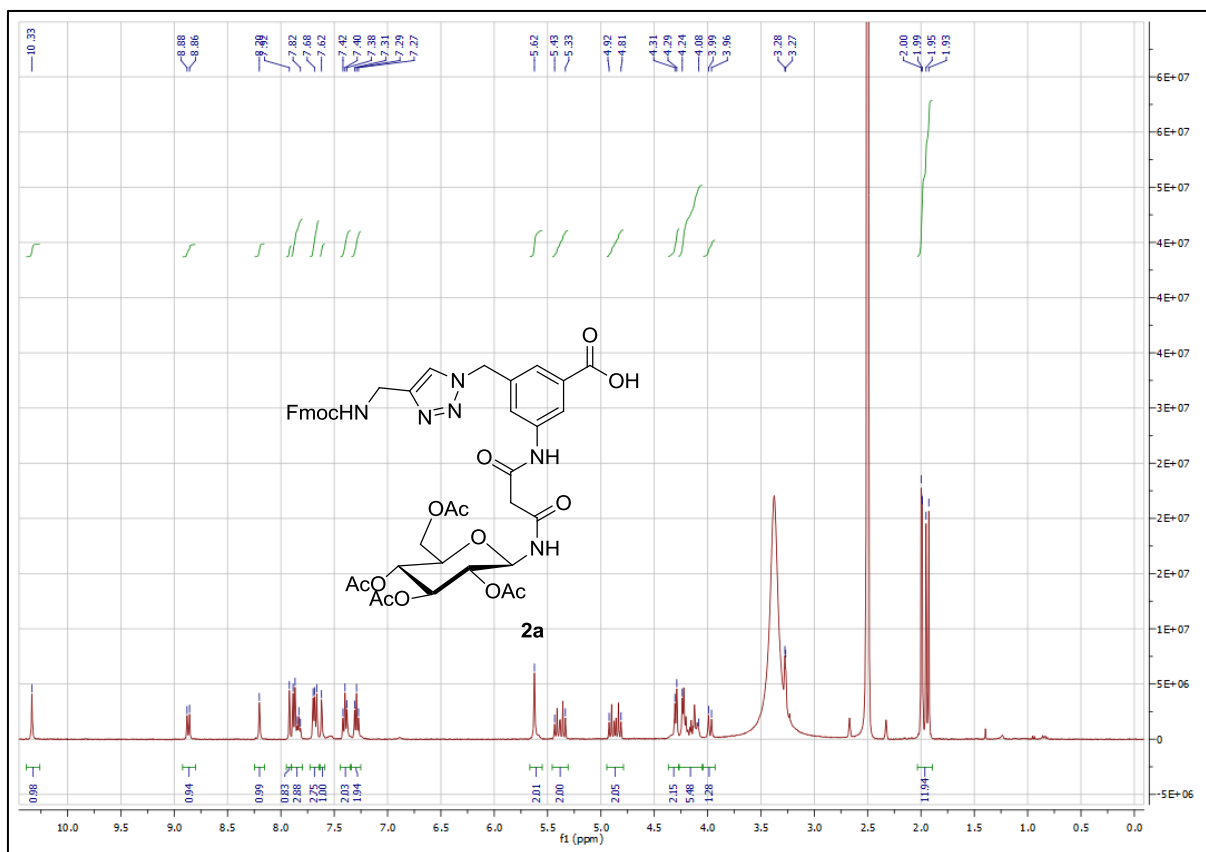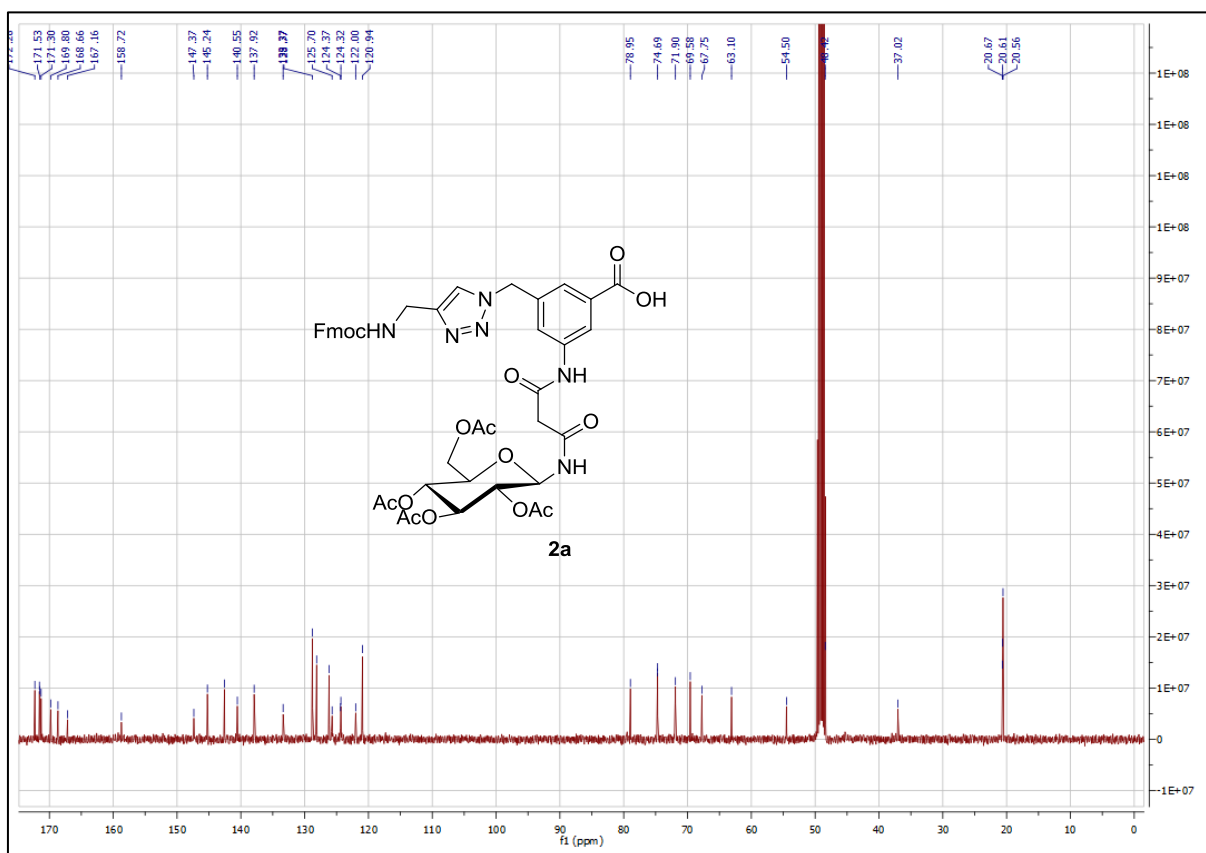

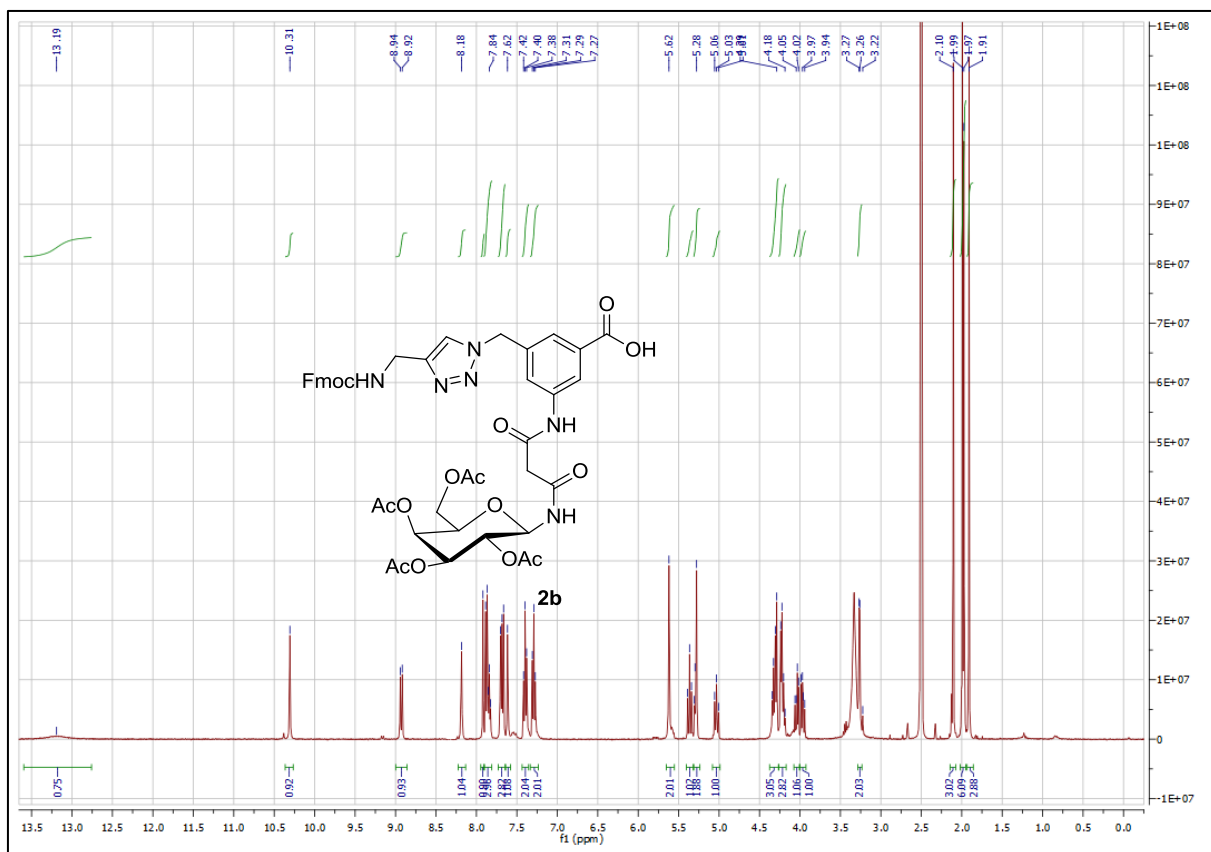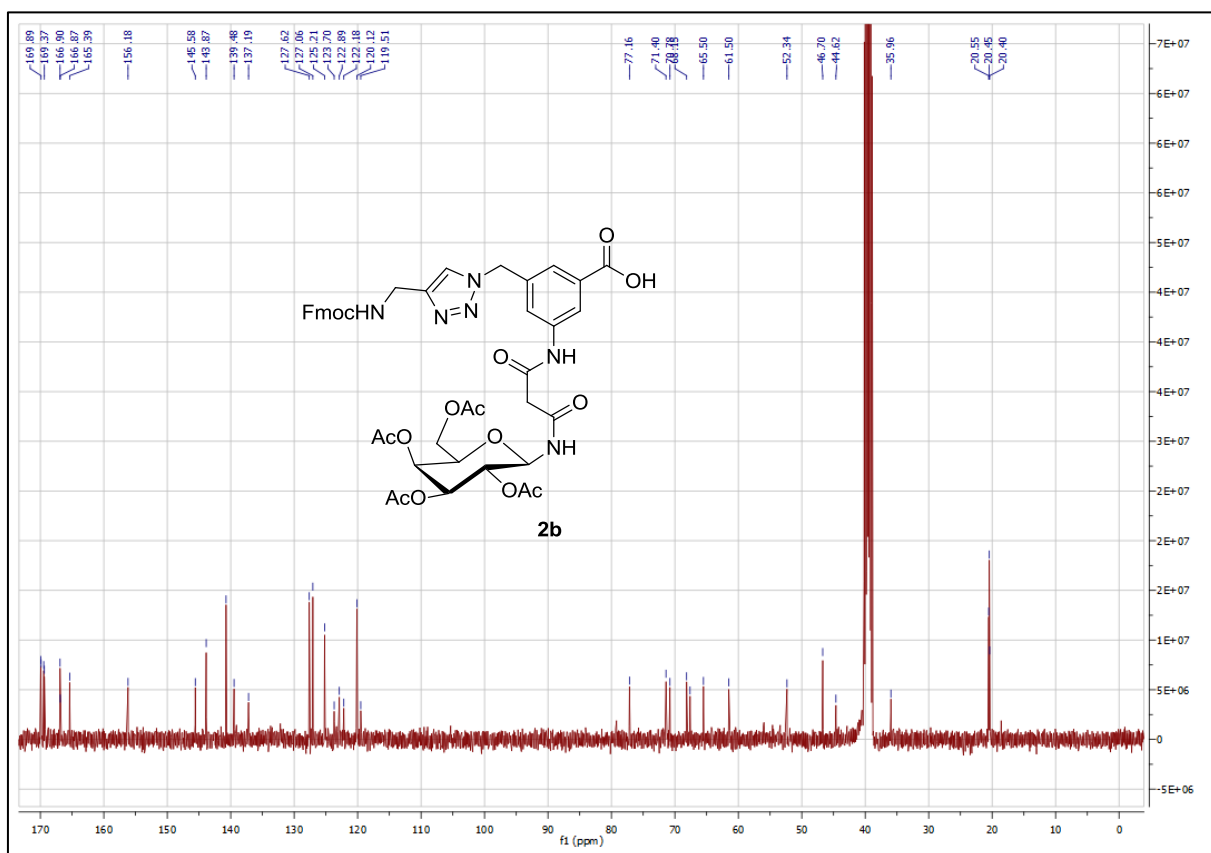

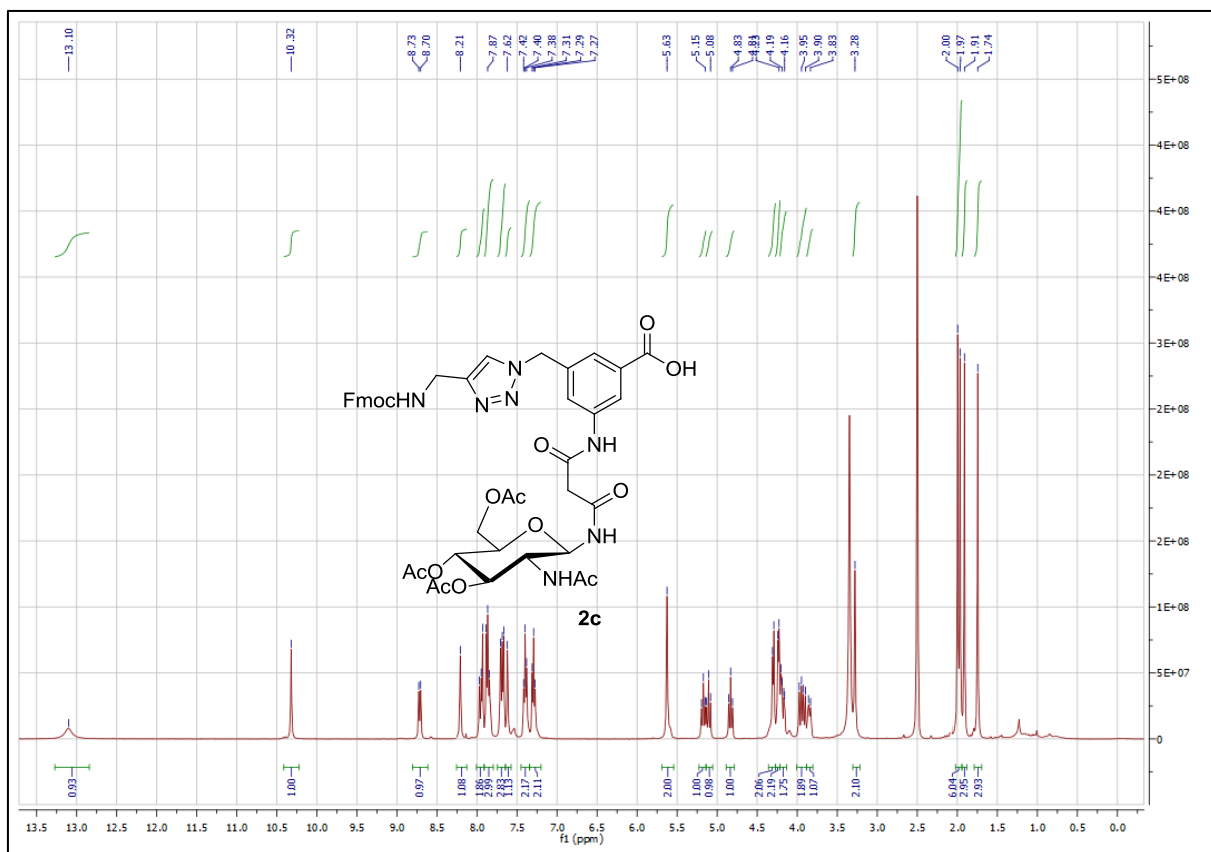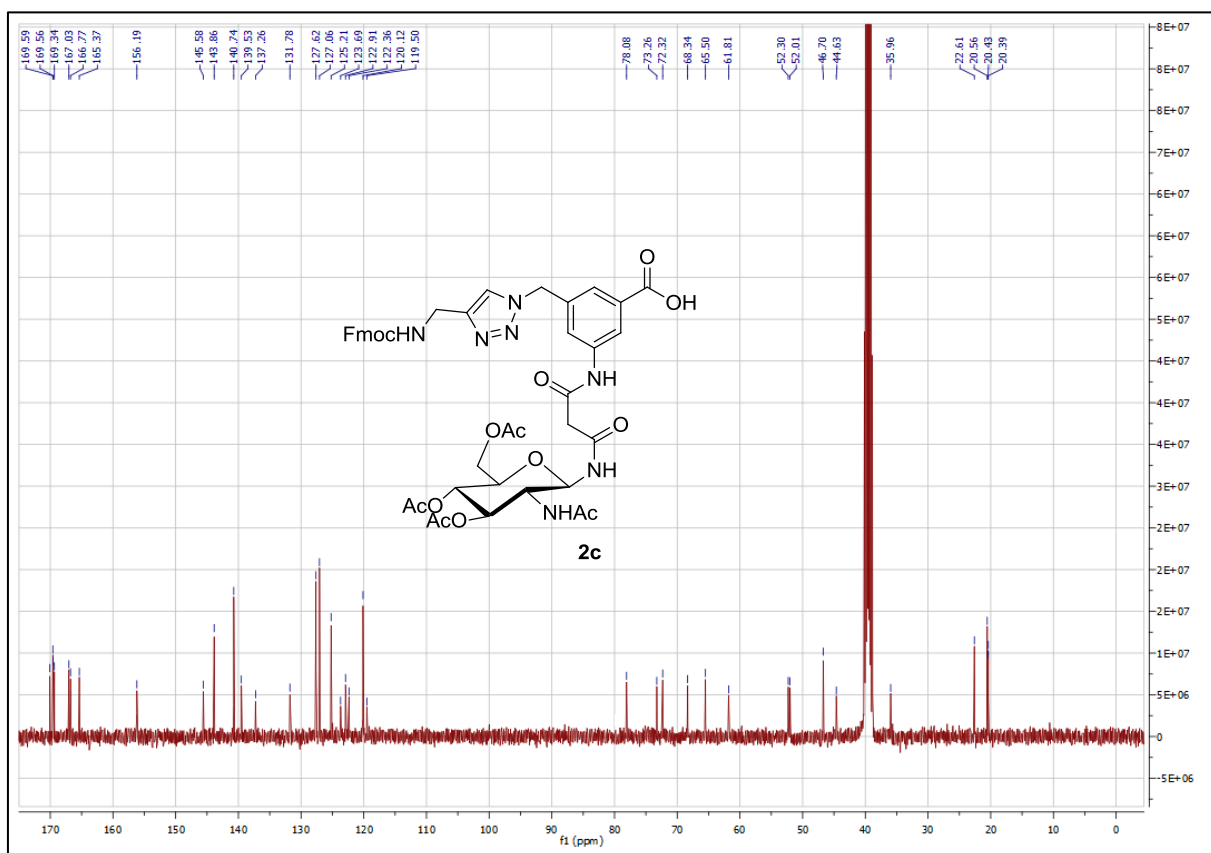

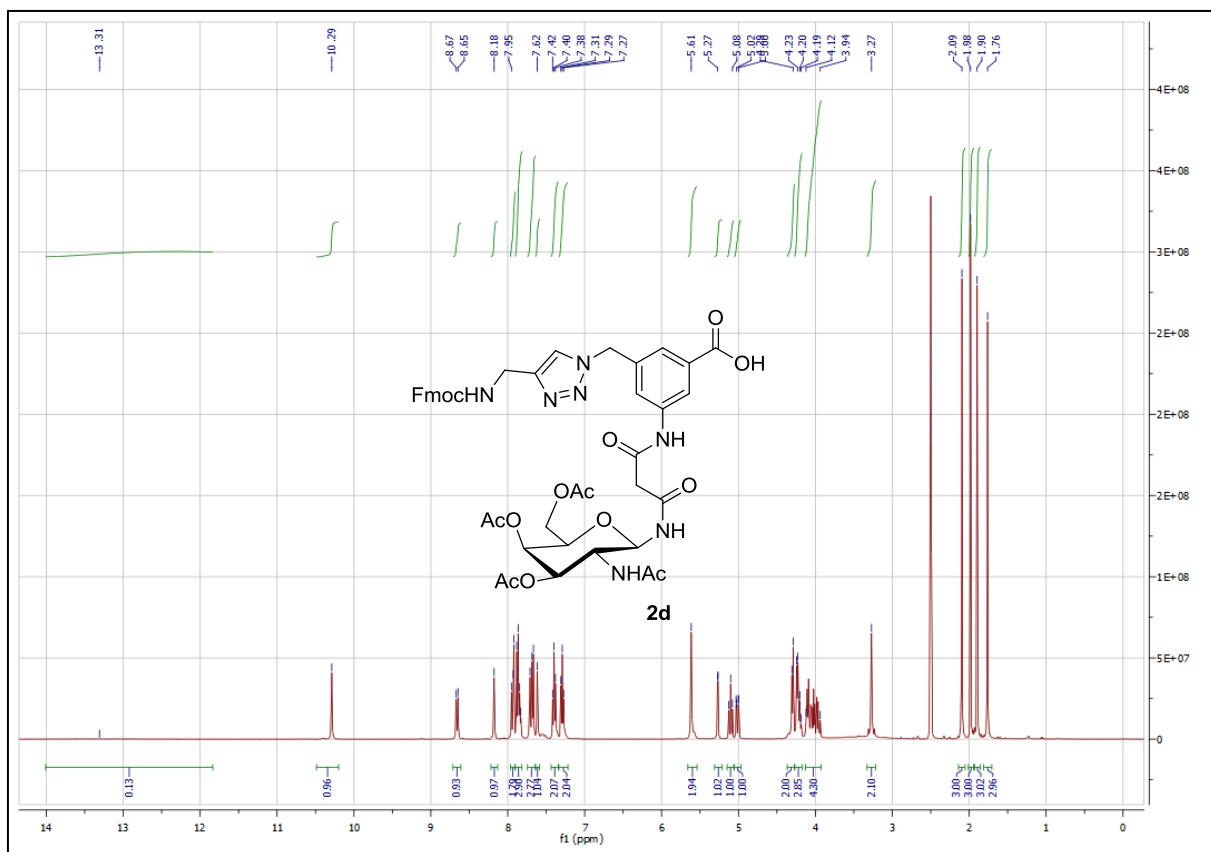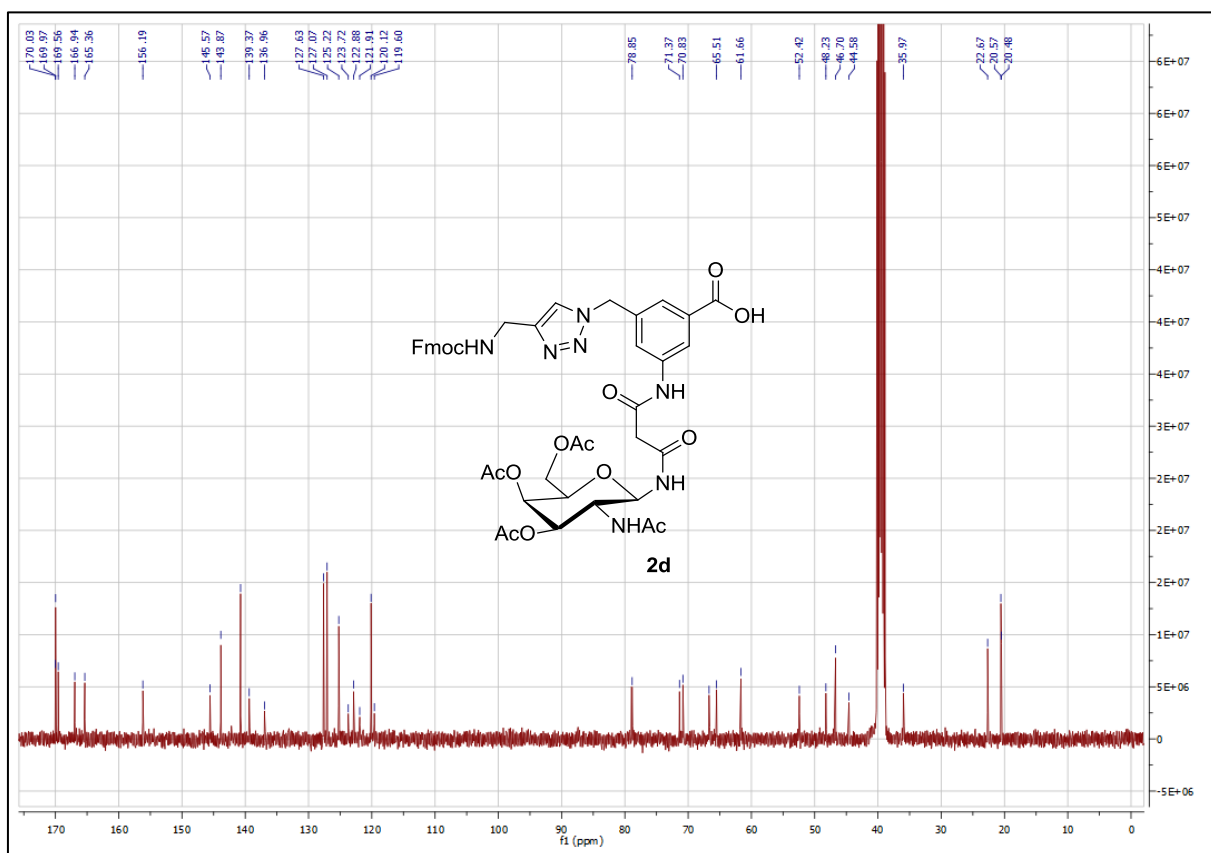

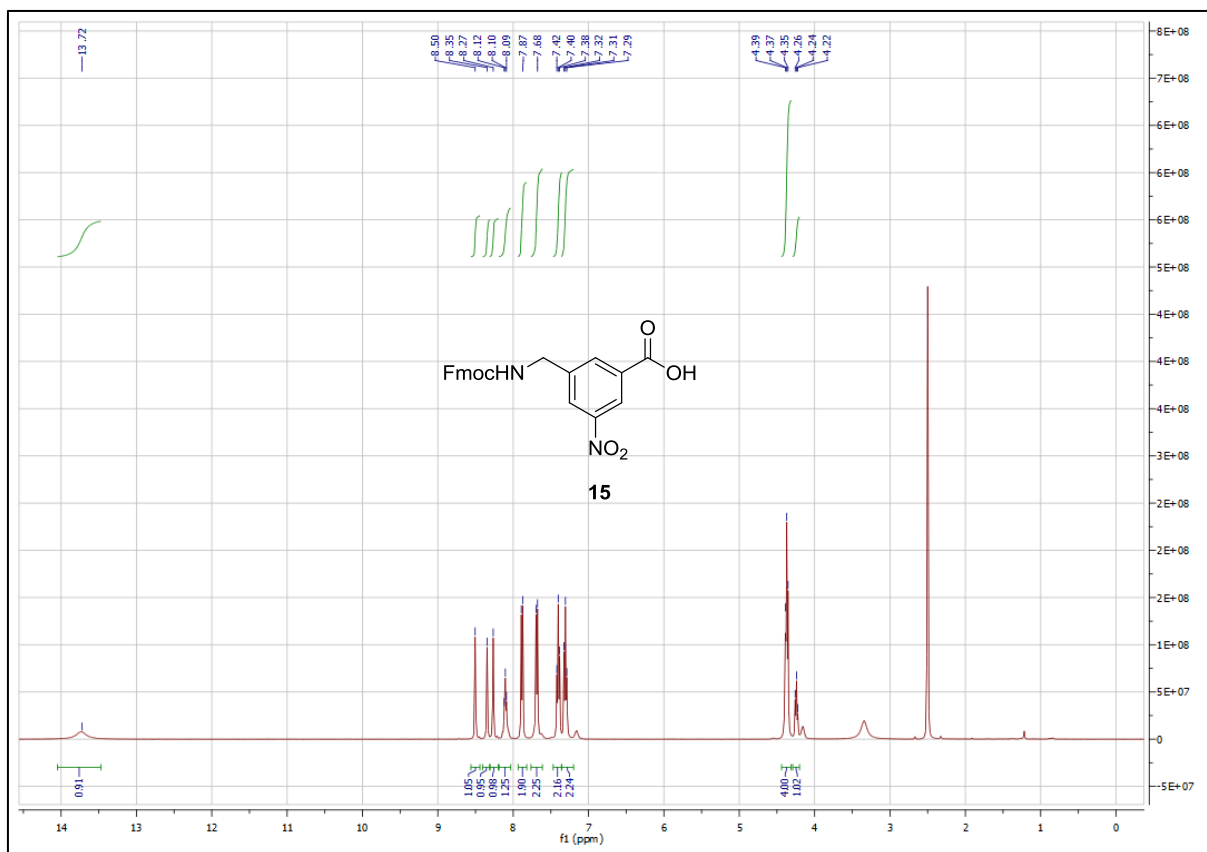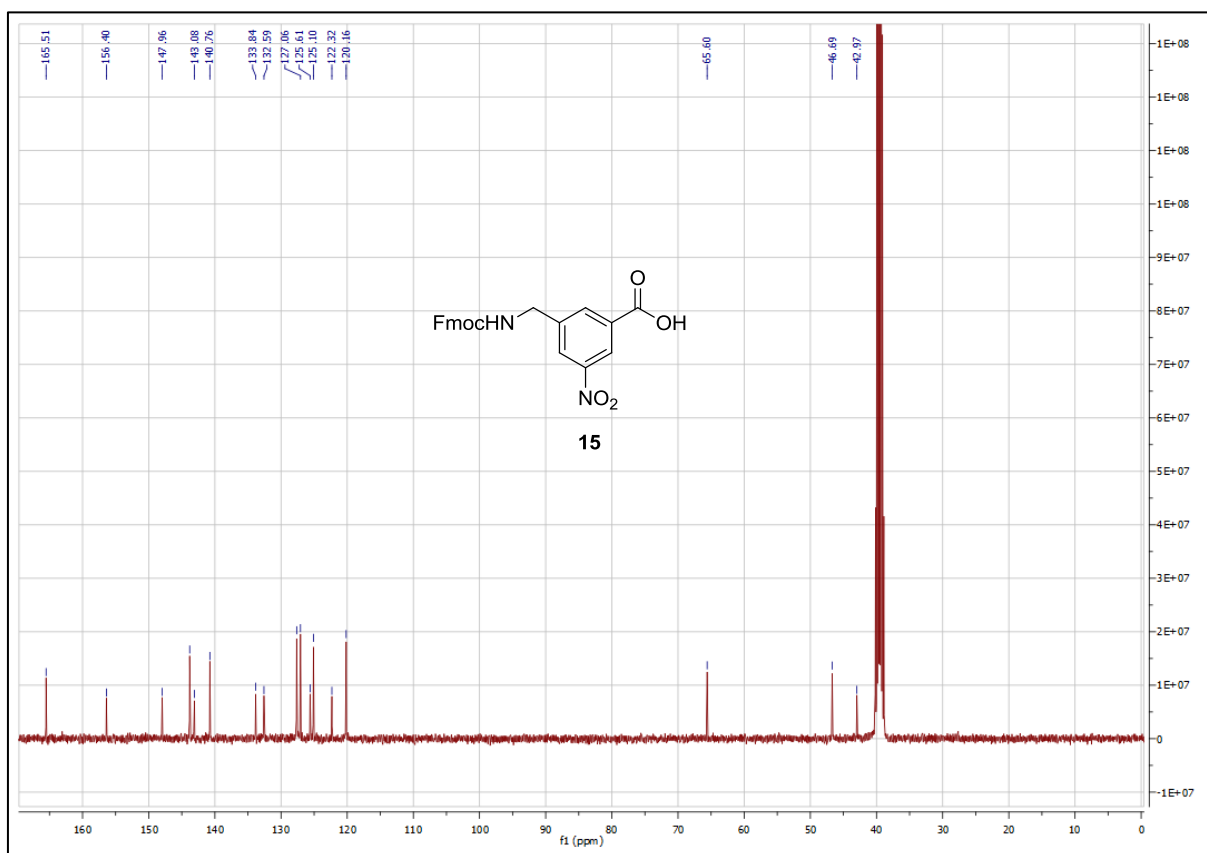



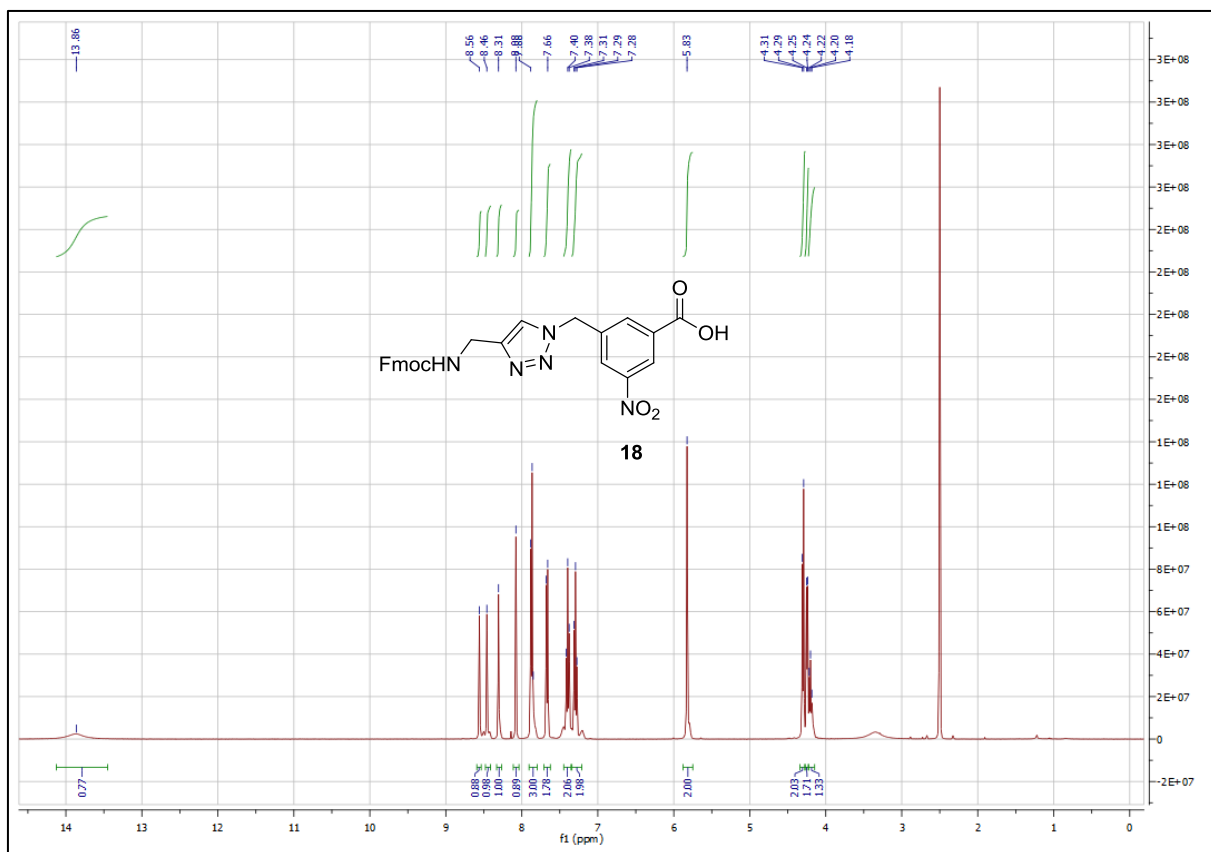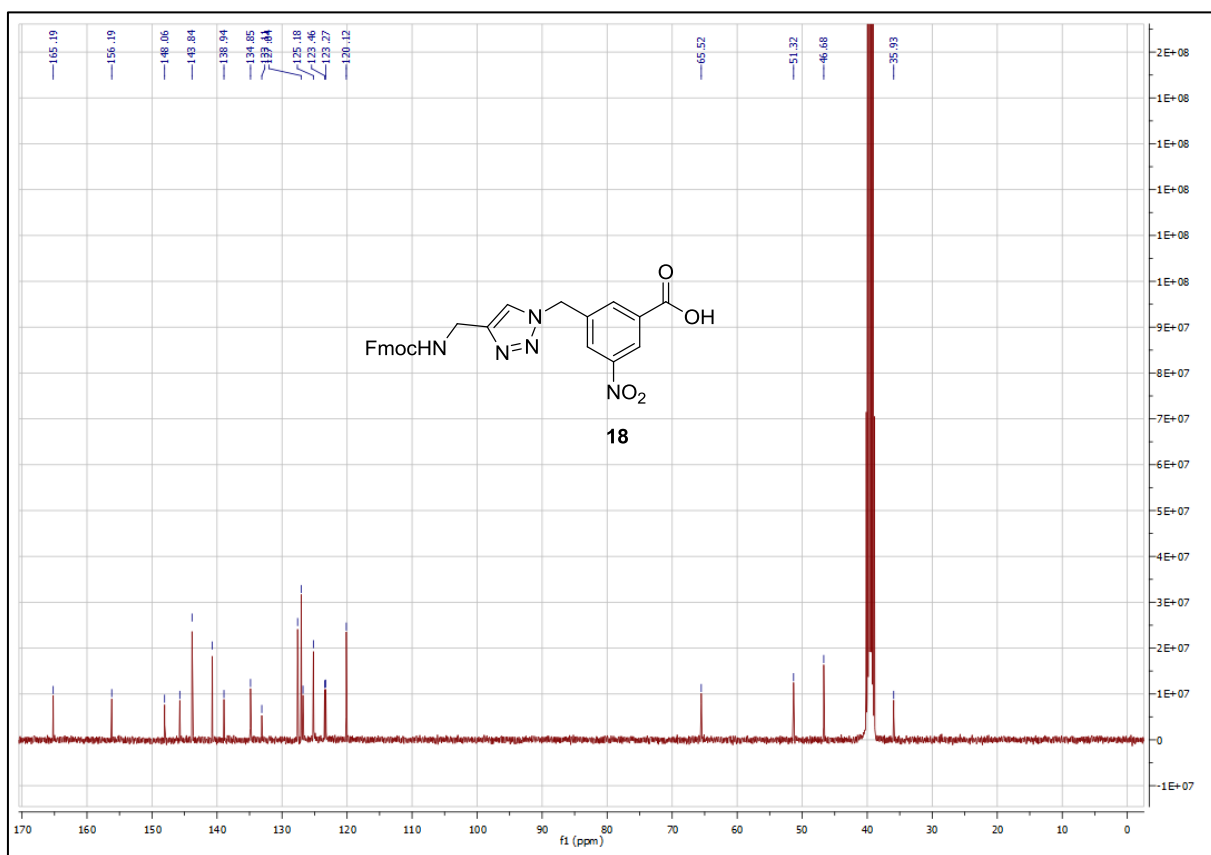

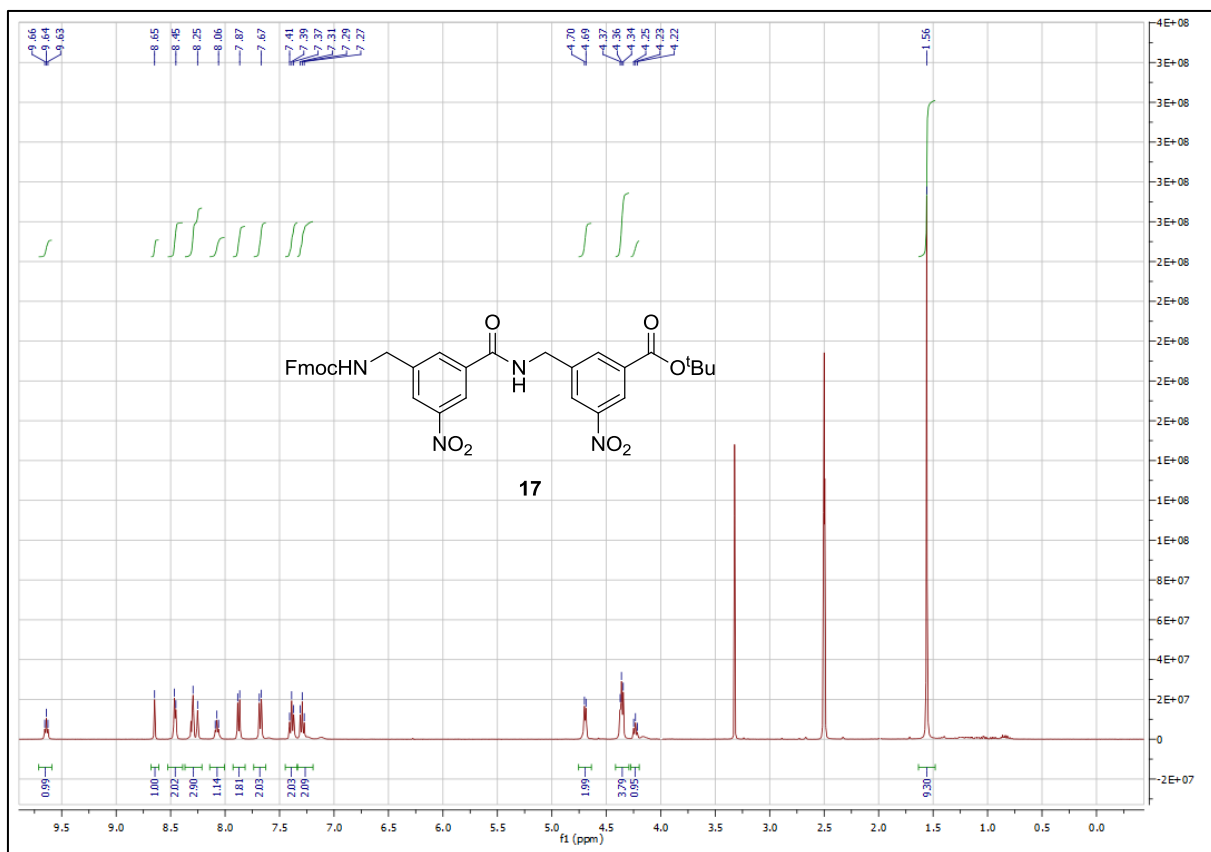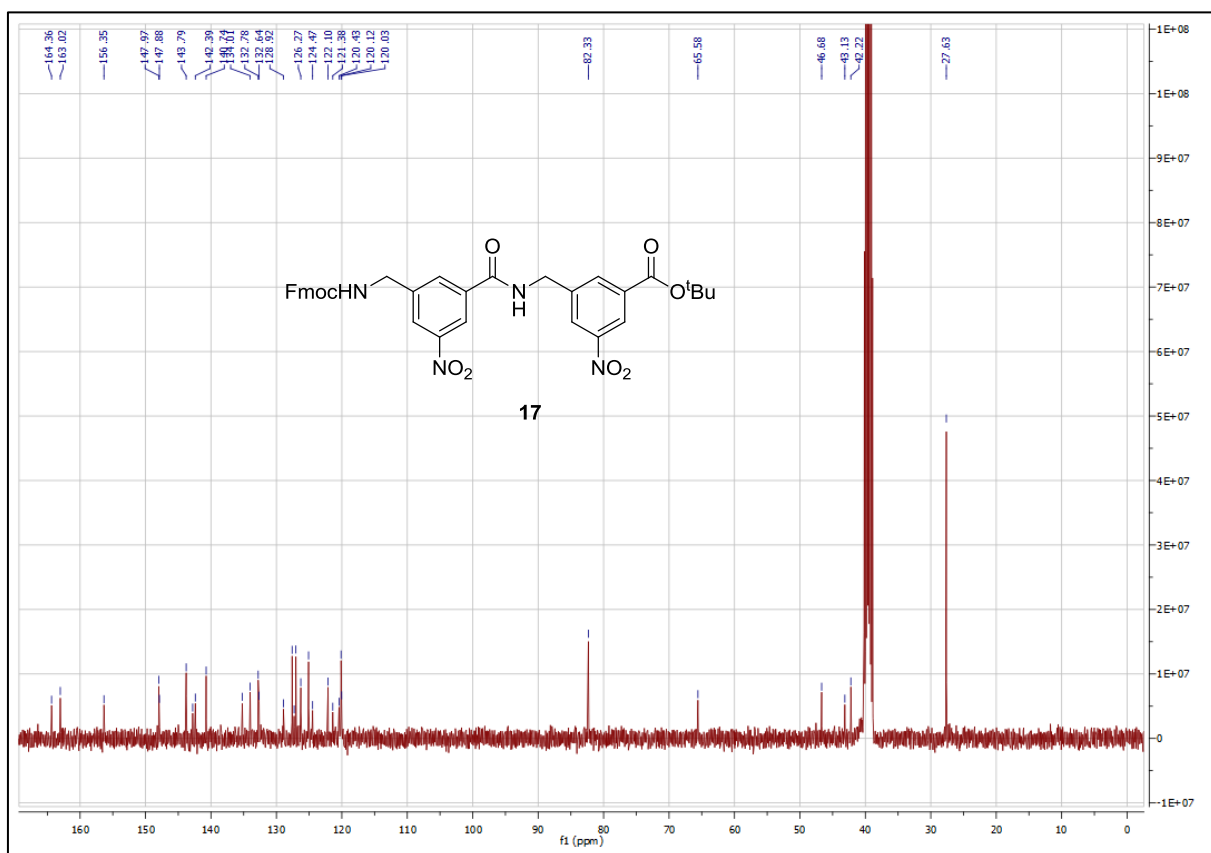

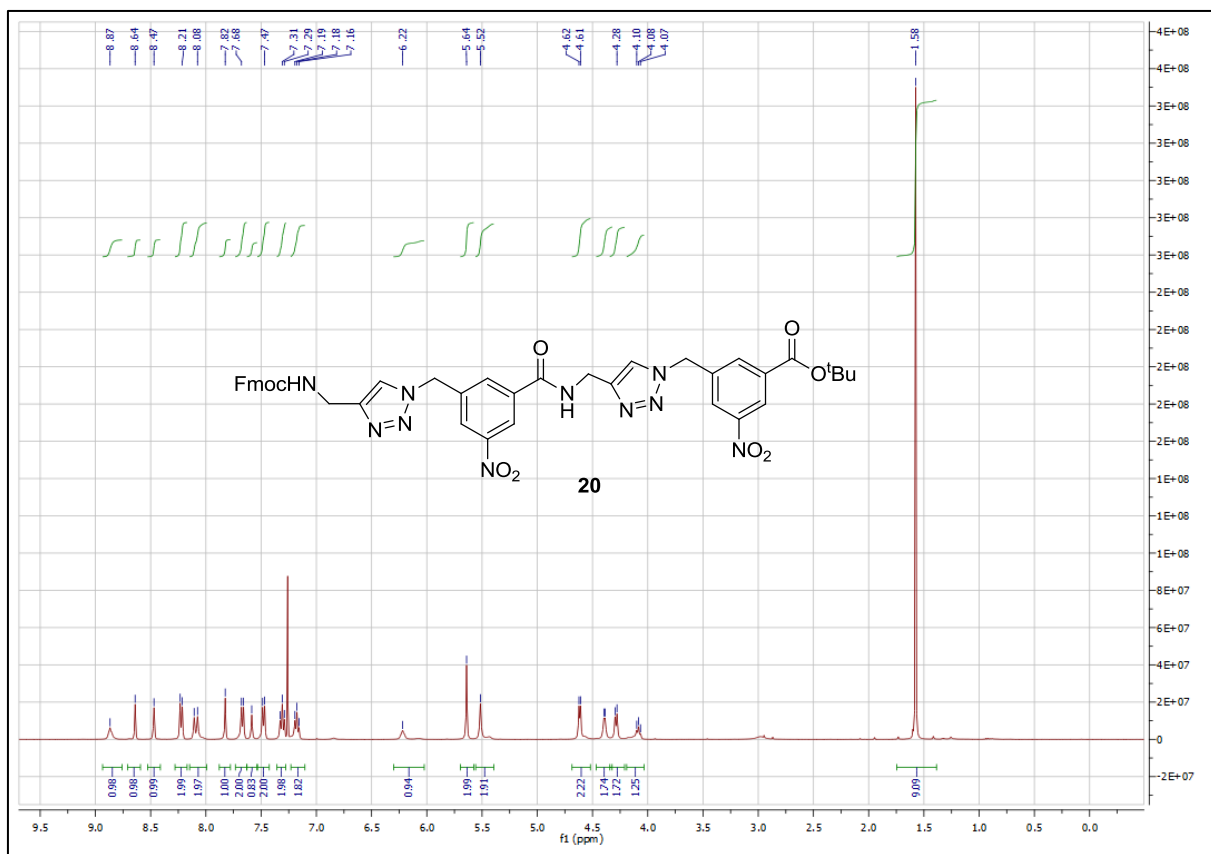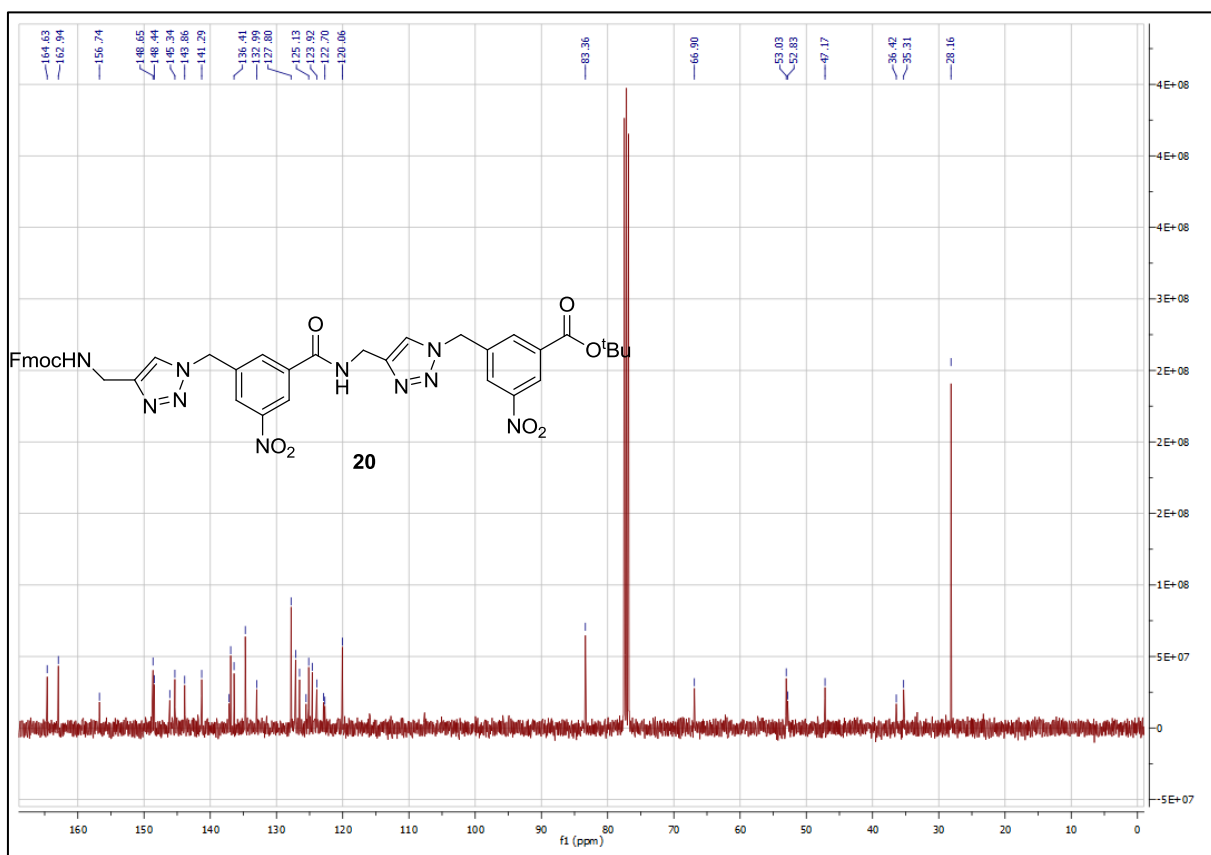

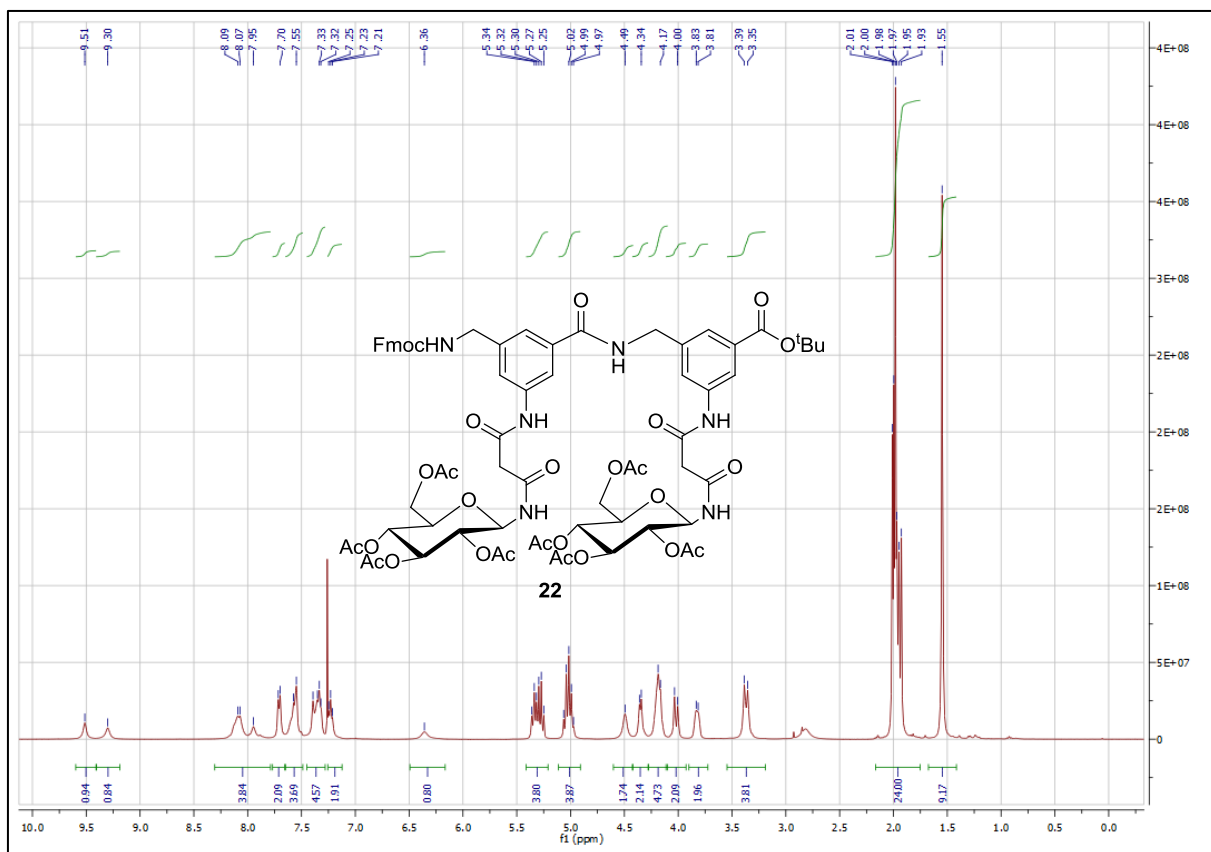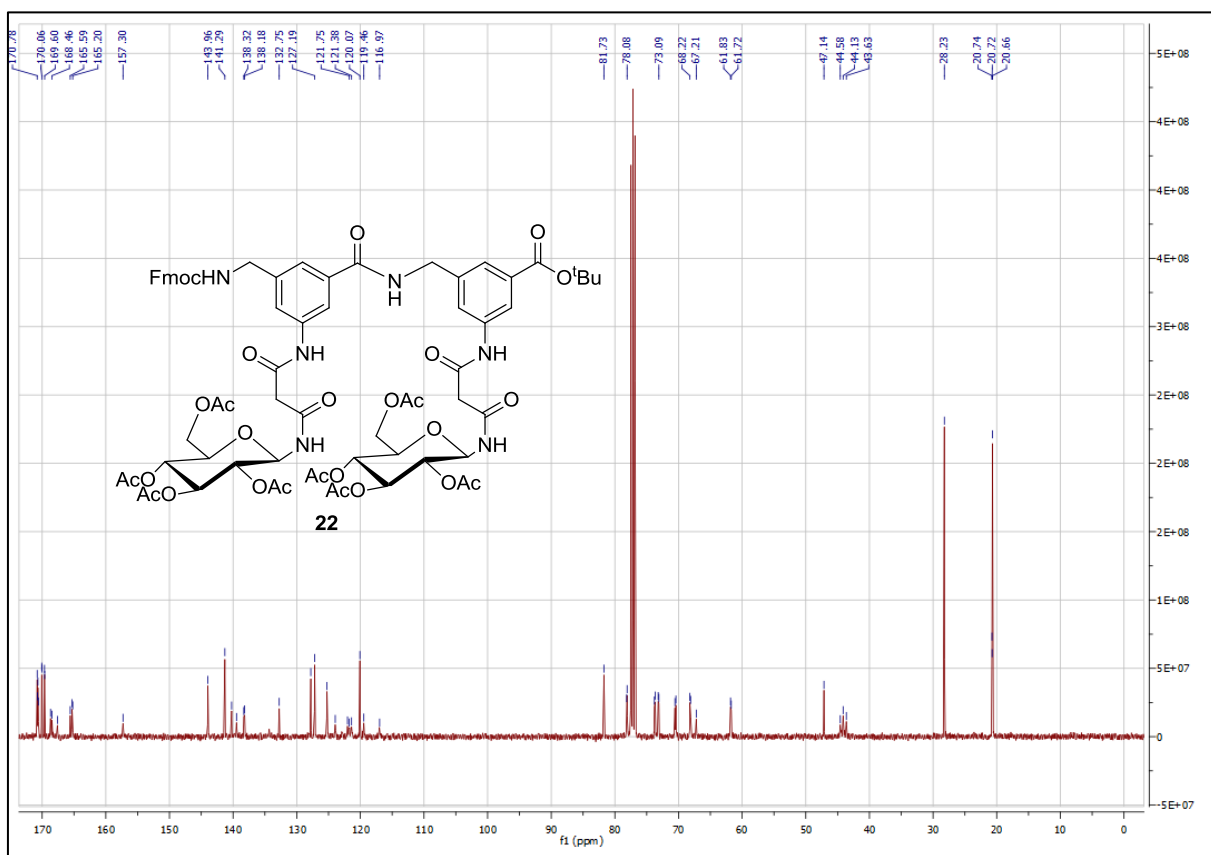

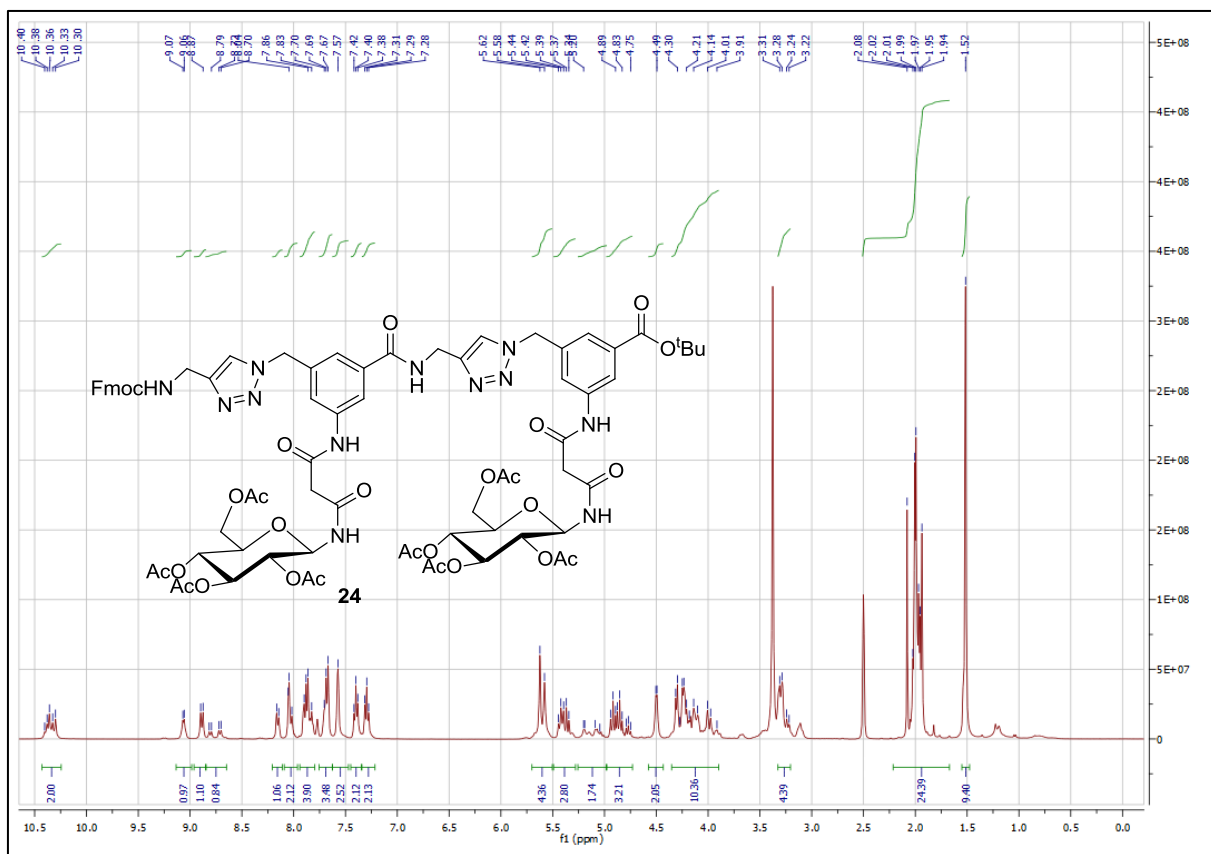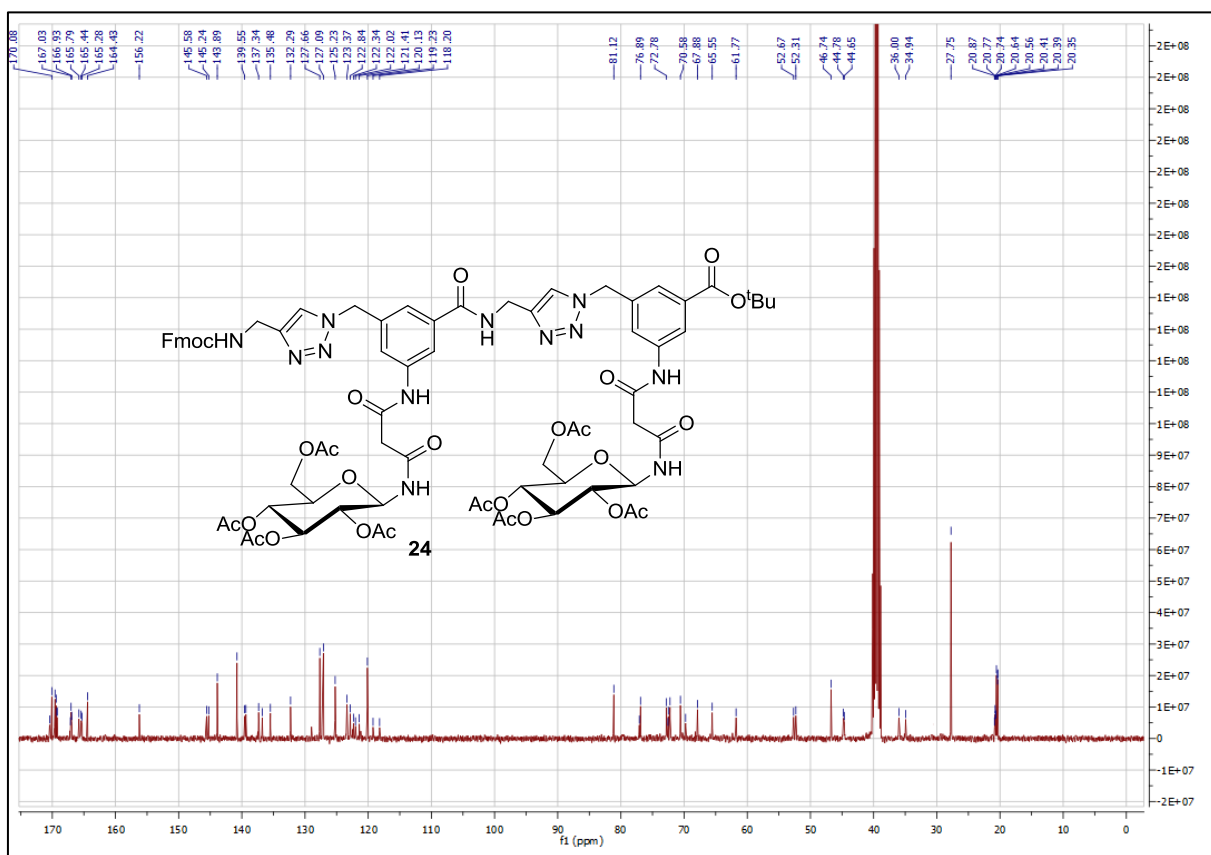

Supplement: Beilstein_J_Org_Chem-10-2453-s002.pdf [file Beilstein_J_Org_Chem-10-2453-s002.pdf]
